# Supplementary material for: Diversity of Fusarium species isolated from UK forage maize and the population structure of F. graminearum from maize and wheat
Source: PeerJ. 2016 Jun 21;4:e2143. doi: 10.7717/peerj.2143 (PMC4924121; doi:10.7717/peerj.2143)
Supplement: Data S1 [file peerj-04-2143-s001.xlsx]

## Sheet: Fspp Identifcation
Fungal ID	Year	Fusarium species	Location	seed/Stalk	JIAf/r (F.avenaceum)	Fc01F/R (F.culmorum)	CRO-AF/R (F.cerealis)	FEF1/R1 (F.equiseti)	Fg16F/R (F.graminearum)	CLOX1/2 (F.oxysporum)	Fp82F/R (F.poae)	PRO1/2 (F.proliferatum)	SUB1/2 (F.subglutinans)	VERT-1/2 (F.verticillioides)
F.spp.1000	2011	F. culmorum	Yorkshire	stalk	−	X	−	−	−	−	−	−	−	−
F.spp.1003	2011	F. graminearum	Yorkshire	stalk	−	−	−	−	X	−	−	−	−	−
F.spp.1004	2011	F. graminearum	Yorkshire	stalk	−	−	−	−	X	−	−	−	−	−
F.spp.1006	2011	F. graminearum	Yorkshire	stalk	−	−	−	−	X	−	−	−	−	−
F.spp.1007	2011	F. graminearum	Yorkshire	stalk	−	−	−	−	X	−	−	−	−	−
F.spp.1010	2011	F. solani	Yorkshire	stalk	−	−	−	−	−	−	−	−	−	−
F.spp.1011	2011	F. solani	Yorkshire	stalk	−	−	−	−	−	−	−	−	−	−
F.spp.1012	2011	F. solani	Yorkshire	stalk	−	−	−	−	−	−	−	−	−	−
F.spp.1014	2011	F. culmorum	Shropshire	seed	−	X	−	−	−	−	−	−	−	−
F.spp.1015	2011	F. cerealis	Shropshire	seed	−	−	X	−	−	−	−	−	−	−
F.spp.1016	2011	F. cerealis	Shropshire	seed	−	−	X	−	−	−	−	−	−	−
F.spp.1017	2011	F. graminearum	Oxfordshire	seed	−	−	−	−	X	−	−	−	−	−
F.spp.1018	2011	F. graminearum	Oxfordshire	seed	−	−	−	−	X	−	−	−	−	−
F.spp.1019	2011	F. cerealis	Shropshire	seed	−	−	X	−	−	−	−	−	−	−
F.spp.1020	2011	F. solani	Yorkshire	stalk	−	−	−	−	−	−	−	−	−	−
F.spp.1023	2011	F. culmorum	Shropshire	stalk	−	X	−	−	−	−	−	−	−	−
F.spp.1025	2011	F. graminearum	Yorkshire	stalk	−	−	−	−	X	−	−	−	−	−
F.spp.1026	2011	F. culmorum	Yorkshire	stalk	−	X	−	−	−	−	−	−	−	−
F.spp.1027	2011	F. culmorum	Shropshire	seed	−	X	−	−	−	−	−	−	−	−
F.spp.1029	2011	F. graminearum	Oxfordshire	seed	−	−	−	−	X	−	−	−	−	−
F.spp.1034	2011	F. solani	Oxfordshire	stalk	−	−	−	−	−	−	−	−	−	−
F.spp.1036	2011	F. graminearum	Yorkshire	stalk	−	−	−	−	X	−	−	−	−	−
F.spp.1037	2011	F. culmorum	Yorkshire	stalk	−	X	−	−	−	−	−	−	−	−
F.spp.1038	2011	F. culmorum	Shropshire	seed	−	X	−	−	−	−	−	−	−	−
F.spp.1040	2011	F. graminearum	Oxfordshire	seed	−	−	−	−	X	−	−	−	−	−
F.spp.1041	2011	F. culmorum	Oxfordshire	seed	−	X	−	−	−	−	−	−	−	−
F.spp.1042	2011	F. culmorum	Shropshire	seed	−	X	−	−	−	−	−	−	−	−
F.spp.1043	2011	F. culmorum	Gloucestershire	seed	−	X	−	−	−	−	−	−	−	−
F.spp.1044	2011	F. culmorum	Shropshire	seed	−	X	−	−	−	−	−	−	−	−
F.spp.1045	2011	F. solani	Shropshire	seed	−	−	−	−	−	−	−	−	−	−
F.spp.1046	2011	F. graminearum	Oxfordshire	seed	−	−	−	−	X	−	−	−	−	−
F.spp.1048	2011	F. graminearum	Yorkshire	stalk	−	−	−	−	X	−	−	−	−	−
F.spp.1049	2011	F. graminearum	Oxfordshire	seed	−	−	−	−	X	−	−	−	−	−
F.spp.1050	2011	F. culmorum	Shropshire	seed	−	X	−	−	−	−	−	−	−	−
F.spp.1051	2011	F. graminearum	Oxfordshire	stalk	−	−	−	−	X	−	−	−	−	−
F.spp.1052	2011	F. subglutinans	Shropshire	stalk	−	−	−	−	−	−	−	−	X	−
F.spp.1054	2011	F. culmorum	Shropshire	stalk	−	X	−	−	−	−	−	−	−	−
F.spp.1060	2011	F. culmorum	Yorkshire	stalk	−	X	−	−	−	−	−	−	−	−
F.spp.1062	2011	F. verticillioides	Yorkshire	stalk	−	−	−	−	−	−	−	−	−	X
F.spp.1063	2011	F. verticillioides	Yorkshire	stalk	−	−	−	−	−	−	−	−	−	X
F.spp.1064	2011	F. avenaceum	Yorkshire	stalk	X	−	−	−	−	−	−	−	−	−
F.spp.1065	2011	F. avenaceum	Yorkshire	stalk	X	−	−	−	−	−	−	−	−	−
F.spp.1066	2011	F. culmorum	Shropshire	stalk	−	X	−	−	−	−	−	−	−	−
F.spp.1067	2011	F. culmorum	Shropshire	stalk	−	X	−	−	−	−	−	−	−	−
F.spp.1068	2011	F. culmorum	Shropshire	stalk	−	X	−	−	−	−	−	−	−	−
F.spp.1070	2011	F. culmorum	Shropshire	stalk	−	X	−	−	−	−	−	−	−	−
F.spp.1072	2011	F. solani	Oxfordshire	stalk	−	−	−	−	−	−	−	−	−	−
F.spp.1073	2011	F. culmorum	Oxfordshire	stalk	−	X	−	−	−	−	−	−	−	−
F.spp.1074	2011	F. graminearum	Yorkshire	stalk	−	−	−	−	X	−	−	−	−	−
F.spp.1076	2011	F. culmorum	Herefordshire	stalk	−	X	−	−	−	−	−	−	−	−
F.spp.1077	2011	F. culmorum	Herefordshire	stalk	−	X	−	−	−	−	−	−	−	−
F.spp.1080	2011	F. culmorum	Herefordshire	stalk	−	X	−	−	−	−	−	−	−	−
F.spp.1081	2011	F. solani	Herefordshire	stalk	−	−	−	−	−	−	−	−	−	−
F.spp.1082	2011	F. solani	Herefordshire	stalk	−	−	−	−	−	−	−	−	−	−
F.spp.1083	2011	F. culmorum	Yorkshire	stalk	−	X	−	−	−	−	−	−	−	−
F.spp.1084	2011	F. solani	Yorkshire	stalk	−	−	−	−	−	−	−	−	−	−
F.spp.1086	2011	F. culmorum	Oxfordshire	stalk	−	X	−	−	−	−	−	−	−	−
F.spp.1090	2011	F. culmorum	Oxfordshire	stalk	−	X	−	−	−	−	−	−	−	−
F.spp.1091	2011	F. culmorum	Oxfordshire	stalk	−	X	−	−	−	−	−	−	−	−
F.spp.1094	2011	F. culmorum	Shropshire	stalk	−	X	−	−	−	−	−	−	−	−
F.spp.1095	2011	F. culmorum	Oxfordshire	stalk	−	X	−	−	−	−	−	−	−	−
F.spp.1096	2011	F. culmorum	Oxfordshire	stalk	−	X	−	−	−	−	−	−	−	−
F.spp.1097	2011	F. graminearum	Oxfordshire	stalk	−	−	−	−	X	−	−	−	−	−
F.spp.1098	2011	F. graminearum	Oxfordshire	stalk	−	−	−	−	X	−	−	−	−	−
F.spp.1100	2011	F. graminearum	Oxfordshire	stalk	−	−	−	−	X	−	−	−	−	−
F.spp.1101	2011	F. culmorum	Shropshire	stalk	−	X	−	−	−	−	−	−	−	−
F.spp.1102	2011	F. culmorum	Shropshire	stalk	−	X	−	−	−	−	−	−	−	−
F.spp.1103	2011	F. culmorum	Herefordshire	stalk	−	X	−	−	−	−	−	−	−	−
F.spp.1105	2011	F. graminearum	Oxfordshire	stalk	−	−	−	−	X	−	−	−	−	−
F.spp.1107	2011	F. culmorum	Shropshire	stalk	−	X	−	−	−	−	−	−	−	−
F.spp.1108	2011	F. culmorum	Oxfordshire	stalk	−	X	−	−	−	−	−	−	−	−
F.spp.1109	2011	F. graminearum	Oxfordshire	stalk	−	−	−	−	X	−	−	−	−	−
F.spp.1110	2011	F. oxysporum	Oxfordshire	stalk	−	−	−	−	−	X	−	−	−	−
F.spp.1111	2011	F. graminearum	Yorkshire	stalk	−	−	−	−	X	−	−	−	−	−
F.spp.1112	2011	F. solani	Yorkshire	stalk	−	−	−	−	−	−	−	−	−	−
F.spp.1113	2011	F. graminearum	Yorkshire	stalk	−	−	−	−	X	−	−	−	−	−
F.spp.1114	2011	F. graminearum	Yorkshire	stalk	−	−	−	−	X	−	−	−	−	−
F.spp.1115	2011	F. solani	Yorkshire	stalk	−	−	−	−	−	−	−	−	−	−
F.spp.1118	2011	F. verticillioides	Yorkshire	stalk	−	−	−	−	−	−	−	−	−	X
F.spp.1121	2011	F. graminearum	Oxfordshire	stalk	−	−	−	−	X	−	−	−	−	−
F.spp.1124	2011	F. graminearum	Oxfordshire	stalk	−	−	−	−	X	−	−	−	−	−
F.spp.1128	2011	F. solani	Herefordshire	stalk	−	−	−	−	−	−	−	−	−	−
F.spp.1129	2011	F. solani	Herefordshire	stalk	−	−	−	−	−	−	−	−	−	−
F.spp.1130	2011	F. graminearum	Oxfordshire	stalk	−	−	−	−	X	−	−	−	−	−
F.spp.1131	2011	F. graminearum	Yorkshire	stalk	−	−	−	−	X	−	−	−	−	−
F.spp.1132	2011	F. culmorum	Yorkshire	stalk	−	X	−	−	−	−	−	−	−	−
F.spp.1133	2011	F. culmorum	Oxfordshire	stalk	−	X	−	−	−	−	−	−	−	−
F.spp.1134	2011	F. verticillioides	Herefordshire	stalk	−	−	−	−	−	−	−	−	−	X
F.spp.1136	2011	F. graminearum	Yorkshire	stalk	−	−	−	−	X	−	−	−	−	−
F.spp.1137	2011	F. culmorum	Yorkshire	stalk	−	X	−	−	−	−	−	−	−	−
F.spp.1138	2011	F. verticillioides	Yorkshire	stalk	−	−	−	−	−	−	−	−	−	X
F.spp.1141	2011	F. graminearum	Yorkshire	stalk	−	−	−	−	X	−	−	−	−	−
F.spp.1144	2011	F. culmorum	Yorkshire	stalk	−	X	−	−	−	−	−	−	−	−
F.spp.1145	2011	F. graminearum	Yorkshire	stalk	−	−	−	−	X	−	−	−	−	−
F.spp.1146	2011	F. solani	Herefordshire	stalk	−	−	−	−	−	−	−	−	−	−
F.spp.1148	2011	F. solani	Herefordshire	stalk	−	−	−	−	−	−	−	−	−	−
F.spp.1149	2011	F. solani	Herefordshire	stalk	−	−	−	−	−	−	−	−	−	−
F.spp.1151	2011	F. culmorum	Herefordshire	stalk	−	X	−	−	−	−	−	−	−	−
F.spp.1153	2011	F. graminearum	Yorkshire	stalk	−	−	−	−	X	−	−	−	−	−
F.spp.1154	2011	F. graminearum	Yorkshire	stalk	−	−	−	−	X	−	−	−	−	−
F.spp.1155	2011	F. solani	Herefordshire	stalk	−	−	−	−	−	−	−	−	−	−
F.spp.1156	2011	F. solani	Shropshire	stalk	−	−	−	−	−	−	−	−	−	−
F.spp.1157	2011	F. culmorum	Shropshire	stalk	−	X	−	−	−	−	−	−	−	−
F.spp.1158	2011	F. cerealis	Shropshire	stalk	−	−	X	−	−	−	−	−	−	−
F.spp.1160	2011	F. graminearum	Shropshire	stalk	−	−	−	−	X	−	−	−	−	−
F.spp.1164	2011	F. solani	Herefordshire	stalk	−	−	−	−	−	−	−	−	−	−
F.spp.1166	2011	F. culmorum	Herefordshire	stalk	−	X	−	−	−	−	−	−	−	−
F.spp.1167	2011	F. culmorum	Herefordshire	stalk	−	X	−	−	−	−	−	−	−	−
F.spp.1170	2011	F. solani	Yorkshire	stalk	−	−	−	−	−	−	−	−	−	−
F.spp.1171	2011	F. solani	Oxfordshire	seed	−	−	−	−	−	−	−	−	−	−
F.spp.1172	2011	F. graminearum	Oxfordshire	seed	−	−	−	−	X	−	−	−	−	−
F.spp.1173	2011	F. culmorum	Shropshire	seed	−	X	−	−	−	−	−	−	−	−
F.spp.1174	2011	F. culmorum	Shropshire	seed	−	X	−	−	−	−	−	−	−	−
F.spp.1175	2011	F. graminearum	Yorkshire	seed	−	−	−	−	X	−	−	−	−	−
F.spp.1176	2011	F. graminearum	Yorkshire	seed	−	−	−	−	X	−	−	−	−	−
F.spp.1177	2011	F. culmorum	Shropshire	seed	−	X	−	−	−	−	−	−	−	−
F.spp.1178	2011	F. solani	Yorkshire	seed	−	−	−	−	−	−	−	−	−	−
F.spp.1179	2011	F. culmorum	Yorkshire	seed	−	X	−	−	−	−	−	−	−	−
F.spp.1180	2011	F. poae	Yorkshire	seed	−	−	−	−	−	−	X	−	−	−
F.spp.1181	2011	F. graminearum	Oxfordshire	seed	−	−	−	−	X	−	−	−	−	−
F.spp.1182	2011	F. culmorum	Yorkshire	seed	−	X	−	−	−	−	−	−	−	−
F.spp.1183	2011	F. solani	Yorkshire	seed	−	−	−	−	−	−	−	−	−	−
F.spp.1185	2011	F. poae	Yorkshire	seed	−	−	−	−	−	−	X	−	−	−
F.spp.1186	2011	F. verticillioides	Yorkshire	seed	−	−	−	−	−	−	−	−	−	X
F.spp.1188	2011	F. avenaceum	Yorkshire	seed	X	−	−	−	−	−	−	−	−	−
F.spp.1189	2011	F. graminearum	Shropshire	seed	−	−	−	−	X	−	−	−	−	−
F.spp.1191	2011	F. culmorum	Shropshire	seed	−	X	−	−	−	−	−	−	−	−
F.spp.1192	2011	F. culmorum	Shropshire	seed	−	X	−	−	−	−	−	−	−	−
F.spp.1193	2011	F. culmorum	Shropshire	seed	−	X	−	−	−	−	−	−	−	−
F.spp.1194	2011	F. graminearum	Oxfordshire	seed	−	−	−	−	X	−	−	−	−	−
F.spp.1195	2011	F. culmorum	Oxfordshire	seed	−	X	−	−	−	−	−	−	−	−
F.spp.1196	2011	F. culmorum	Oxfordshire	seed	−	X	−	−	−	−	−	−	−	−
F.spp.1198	2011	F. culmorum	Shropshire	seed	−	X	−	−	−	−	−	−	−	−
F.spp.1200	2011	F. culmorum	Shropshire	seed	−	X	−	−	−	−	−	−	−	−
F.spp.1201	2011	F. graminearum	Yorkshire	seed	−	−	−	−	X	−	−	−	−	−
F.spp.1202	2011	F. graminearum	Yorkshire	seed	−	−	−	−	X	−	−	−	−	−
F.spp.1204	2011	F. graminearum	Oxfordshire	seed	−	−	−	−	X	−	−	−	−	−
F.spp.1205	2011	F. culmorum	Shropshire	seed	−	X	−	−	−	−	−	−	−	−
F.spp.1206	2011	F. culmorum	Shropshire	seed	−	X	−	−	−	−	−	−	−	−
F.spp.1207	2011	F. culmorum	Shropshire	seed	−	X	−	−	−	−	−	−	−	−
F.spp.1208	2011	F. solani	Shropshire	seed	−	−	−	−	−	−	−	−	−	−
F.spp.1209	2011	F. graminearum	Oxfordshire	seed	−	−	−	−	X	−	−	−	−	−
F.spp.1212	2011	F. graminearum	Oxfordshire	seed	−	−	−	−	X	−	−	−	−	−
F.spp.1213	2011	F. graminearum	Oxfordshire	seed	−	−	−	−	X	−	−	−	−	−
F.spp.1214	2011	F. solani	Yorkshire	seed	−	−	−	−	−	−	−	−	−	−
F.spp.1216	2011	F. solani	Oxfordshire	seed	−	−	−	−	−	−	−	−	−	−
F.spp.1217	2011	F. verticillioides	Yorkshire	seed	−	−	−	−	−	−	−	−	−	X
F.spp.1218	2011	F. oxysporum	Yorkshire	seed	−	−	−	−	−	X	−	−	−	−
F.spp.1219	2011	F. solani	Yorkshire	seed	−	−	−	−	−	−	−	−	−	−
F.spp.1221	2011	F. napiforme	Yorkshire	seed	−	−	−	−	−	−	−	−	−	−
F.spp.1223	2011	F. poae	Yorkshire	seed	−	−	−	−	−	−	X	−	−	−
F.spp.1227	2011	F. solani	Yorkshire	seed	−	−	−	−	−	−	−	−	−	−
F.spp.1230	2011	F. graminearum	Yorkshire	seed	−	−	−	−	X	−	−	−	−	−
F.spp.1231	2011	F. verticillioides	Yorkshire	seed	−	−	−	−	−	−	−	−	−	X
F.spp.1236	2011	F. culmorum	Shropshire	seed	−	X	−	−	−	−	−	−	−	−
F.spp.1237	2011	F. graminearum	Oxfordshire	seed	−	−	−	−	X	−	−	−	−	−
F.spp.1240	2011	F. graminearum	Oxfordshire	seed	−	−	−	−	X	−	−	−	−	−
F.spp.1241	2011	F. graminearum	Oxfordshire	seed	−	−	−	−	X	−	−	−	−	−
F.spp.1243	2011	F. graminearum	Oxfordshire	seed	−	−	−	−	X	−	−	−	−	−
F.spp.1245	2011	F. culmorum	Yorkshire	seed	−	X	−	−	−	−	−	−	−	−
F.spp.1249	2011	F. verticillioides	Yorkshire	seed	−	−	−	−	−	−	−	−	−	X
F.spp.1250	2011	F. graminearum	Oxfordshire	seed	−	−	−	−	X	−	−	−	−	−
F.spp.1251	2011	F. culmorum	Yorkshire	seed	−	X	−	−	−	−	−	−	−	−
F.spp.1252	2011	F. culmorum	Oxfordshire	seed	−	X	−	−	−	−	−	−	−	−
F.spp.1256	2011	F. solani	Herefordshire	seed	−	−	−	−	−	−	−	−	−	−
F.spp.1258	2011	F. graminearum	Oxfordshire	seed	−	−	−	−	X	−	−	−	−	−
F.spp.1261	2011	F. cerealis	Shropshire	seed	−	−	X	−	−	−	−	−	−	−
F.spp.1262	2011	F. poae	Oxfordshire	seed	−	−	−	−	−	−	X	−	−	−
F.spp.1263	2011	F. solani	Yorkshire	seed	−	−	−	−	−	−	−	−	−	−
F.spp.1266	2011	F. poae	Herefordshire	seed	−	−	−	−	−	−	X	−	−	−
F.spp.1268	2011	F. culmorum	Shropshire	seed	−	X	−	−	−	−	−	−	−	−
F.spp.1269	2011	F. solani	Oxfordshire	seed	−	−	−	−	−	−	−	−	−	−
F.spp.1272	2011	F. culmorum	Shropshire	seed	−	X	−	−	−	−	−	−	−	−
F.spp.1273	2011	F. cerealis	Shropshire	seed	−	−	X	−	−	−	−	−	−	−
F.spp.1278	2011	F. graminearum	Yorkshire	seed	−	−	−	−	X	−	−	−	−	−
F.spp.1280	2011	F. graminearum	Yorkshire	seed	−	−	−	−	X	−	−	−	−	−
F.spp.1281	2011	F. poae	Yorkshire	seed	−	−	−	−	−	−	X	−	−	−
F.spp.1283	2011	F. culmorum	Shropshire	seed	−	X	−	−	−	−	−	−	−	−
F.spp.1286	2011	F. solani	Oxfordshire	seed	−	−	−	−	−	−	−	−	−	−
F.spp.1287	2011	F. cerealis	Yorkshire	seed	−	−	X	−	−	−	−	−	−	−
F.spp.1289	2011	F. culmorum	Yorkshire	seed	−	X	−	−	−	−	−	−	−	−
F.spp.1290	2011	F. culmorum	Yorkshire	seed	−	X	−	−	−	−	−	−	−	−
F.spp.1291	2011	F. solani	Yorkshire	seed	−	−	−	−	−	−	−	−	−	−
F.spp.1293	2011	F. solani	Yorkshire	seed	−	−	−	−	−	−	−	−	−	−
F.spp.1296	2011	F. solani	Yorkshire	seed	−	−	−	−	−	−	−	−	−	−
F.spp.1298	2011	F. graminearum	herefordshire	seed	−	−	−	−	X	−	−	−	−	−
F.spp.1299	2011	F. graminearum	Yorkshire	seed	−	−	−	−	X	−	−	−	−	−
F.spp.1300	2011	F. graminearum	Oxfordshire	seed	−	−	−	−	X	−	−	−	−	−
F.spp.1301	2011	F. oxysporum	Yorkshire	seed	−	−	−	−	−	X	−	−	−	−
F.spp.1302	2011	F. graminearum	Oxfordshire	seed	−	−	−	−	X	−	−	−	−	−
F.spp.1305	2011	F. culmorum	Herefordshire	seed	−	X	−	−	−	−	−	−	−	−
F.spp.1306	2011	F. oxysporum	Oxfordshire	seed	−	−	−	−	−	X	−	−	−	−
F.spp.1307	2011	F. graminearum	Shropshire	seed	−	−	−	−	X	−	−	−	−	−
F.spp.1311	2011	F. graminearum	Yorkshire	seed	−	−	−	−	X	−	−	−	−	−
F.spp.1312	2011	F. verticillioides	Yorkshire	seed	−	−	−	−	−	−	−	−	−	X
F.spp.1314	2011	F. solani	Oxfordshire	seed	−	−	−	−	−	−	−	−	−	−
F.spp.1315	2011	F. solani	Oxfordshire	seed	−	−	−	−	−	−	−	−	−	−
F.spp.1316	2011	F. solani	Oxfordshire	seed	−	−	−	−	−	−	−	−	−	−
F.spp.1317	2011	F. graminearum	Yorkshire	seed	−	−	−	−	X	−	−	−	−	−
F.spp.1318	2011	F. culmorum	Shropshire	seed	−	X	−	−	−	−	−	−	−	−
F.spp.1319	2011	F. solani	Yorkshire	seed	−	−	−	−	−	−	−	−	−	−
F.spp.1321	2011	F. solani	Yorkshire	seed	−	−	−	−	−	−	−	−	−	−
F.spp.1322	2011	F. solani	Yorkshire	seed	−	−	−	−	−	−	−	−	−	−
F.spp.1326	2011	F. culmorum	Shropshire	stalk	−	X	−	−	−	−	−	−	−	−
F.spp.1327	2011	F. graminearum	Sussex	stalk	−	−	−	−	X	−	−	−	−	−
F.spp.1328	2011	F. graminearum	Sussex	stalk	−	−	−	−	X	−	−	−	−	−
F.spp.1330	2011	F. avenaceum	Sussex	stalk	X	−	−	−	−	−	−	−	−	−
F.spp.1331	2011	F. culmorum	Shropshire	stalk	−	X	−	−	−	−	−	−	−	−
F.spp.1332	2011	F. culmorum	Sussex	stalk	−	X	−	−	−	−	−	−	−	−
F.spp.1333	2011	F. solani	Devon	stalk	−	−	−	−	−	−	−	−	−	−
F.spp.1338	2011	F. graminearum	Devon	stalk	−	−	−	−	X	−	−	−	−	−
F.spp.1340	2011	F. graminearum	Devon	stalk	−	−	−	−	X	−	−	−	−	−
F.spp.1342	2011	F. culmorum	Herefordshire	stalk	−	X	−	−	−	−	−	−	−	−
F.spp.1344	2011	F. graminearum	Devon	stalk	−	−	−	−	X	−	−	−	−	−
F.spp.1345	2011	F. culmorum	Devon	stalk	−	X	−	−	−	−	−	−	−	−
F.spp.1349	2011	F. subglutinans	Shropshire	stalk	−	−	−	−	−	−	−	−	X	−
F.spp.1351	2011	F. tricinctum	Devon	stalk	−	−	−	−	−	−	−	−	−	−
F.spp.1352	2011	F. culmorum	Devon	stalk	−	X	−	−	−	−	−	−	−	−
F.spp.1353	2011	F. culmorum	Shropshire	stalk	−	X	−	−	−	−	−	−	−	−
F.spp.1354	2011	F. culmorum	Herefordshire	stalk	−	X	−	−	−	−	−	−	−	−
F.spp.1355	2011	F. avenaceum	Devon	stalk	X	−	−	−	−	−	−	−	−	−
F.spp.1356	2011	F. cerealis	Devon	stalk	−	−	X	−	−	−	−	−	−	−
F.spp.1358	2011	F. culmorum	Devon	stalk	−	X	−	−	−	−	−	−	−	−
F.spp.1359	2011	F. culmorum	Herefordshire	stalk	−	X	−	−	−	−	−	−	−	−
F.spp.1360	2011	F. culmorum	Herefordshire	stalk	−	X	−	−	−	−	−	−	−	−
F.spp.1361	2011	F. graminearum	Devon	stalk	−	−	−	−	X	−	−	−	−	−
F.spp.1363	2011	F. culmorum	Oxfordshire	stalk	−	X	−	−	−	−	−	−	−	−
F.spp.1364	2011	F. graminearum	Oxfordshire	stalk	−	−	−	−	X	−	−	−	−	−
F.spp.1365	2011	F. avenaceum	Oxfordshire	stalk	X	−	−	−	−	−	−	−	−	−
F.spp.1366	2011	F. culmorum	Oxfordshire	stalk	−	X	−	−	−	−	−	−	−	−
F.spp.1367	2011	F. culmorum	Oxfordshire	stalk	−	X	−	−	−	−	−	−	−	−
F.spp.1369	2011	F. culmorum	Shropshire	stalk	−	X	−	−	−	−	−	−	−	−
F.spp.1370	2011	F. culmorum	Shropshire	stalk	−	X	−	−	−	−	−	−	−	−
F.spp.1372	2011	F. graminearum	Sussex	stalk	−	−	−	−	X	−	−	−	−	−
F.spp.1373	2011	F. culmorum	Sussex	stalk	−	X	−	−	−	−	−	−	−	−
F.spp.1378	2011	F. graminearum	Oxfordshire	stalk	−	−	−	−	X	−	−	−	−	−
F.spp.1379	2011	F. verticillioides	Sussex	stalk	−	−	−	−	−	−	−	−	−	X
F.spp.1382	2011	F. culmorum	Shropshire	stalk	−	X	−	−	−	−	−	−	−	−
F.spp.1383	2011	F. culmorum	Shropshire	stalk	−	X	−	−	−	−	−	−	−	−
F.spp.1384	2011	F. solani	Somerset	stalk	−	−	−	−	−	−	−	−	−	−
F.spp.1386	2011	F. culmorum	Somerset	stalk	−	X	−	−	−	−	−	−	−	−
F.spp.1387	2011	F. graminearum	Oxfordshire	stalk	−	−	−	−	X	−	−	−	−	−
F.spp.1389	2011	F. solani	Oxfordshire	stalk	−	−	−	−	−	−	−	−	−	−
F.spp.1392	2011	F. graminearum	Devon	stalk	−	−	−	−	X	−	−	−	−	−
F.spp.1393	2011	F. culmorum	Sussex	stalk	−	X	−	−	−	−	−	−	−	−
F.spp.1395	2011	F. culmorum	Sussex	stalk	−	X	−	−	−	−	−	−	−	−
F.spp.1397	2011	F. graminearum	Oxfordshire	stalk	−	−	−	−	X	−	−	−	−	−
F.spp.1398	2011	F. graminearum	Oxfordshire	stalk	−	−	−	−	X	−	−	−	−	−
F.spp.1400	2011	F. culmorum	Oxfordshire	stalk	−	X	−	−	−	−	−	−	−	−
F.spp.1403	2011	F. graminearum	Oxfordshire	stalk	−	−	−	−	X	−	−	−	−	−
F.spp.1404	2011	F. graminearum	Oxfordshire	stalk	−	−	−	−	X	−	−	−	−	−
F.spp.1405	2011	F. culmorum	Devon	stalk	−	X	−	−	−	−	−	−	−	−
F.spp.1407	2011	F. cerealis	Devon	stalk	−	−	X	−	−	−	−	−	−	−
F.spp.1408	2011	F. culmorum	Sussex	stalk	−	X	−	−	−	−	−	−	−	−
F.spp.1409	2011	F. solani	Sussex	stalk	−	−	−	−	−	−	−	−	−	−
F.spp.1410	2011	F. graminearum	Sussex	stalk	−	−	−	−	X	−	−	−	−	−
F.spp.1411	2011	F. culmorum	Somerset	stalk	−	X	−	−	−	−	−	−	−	−
F.spp.1412	2011	F. graminearum	Oxfordshire	stalk	−	−	−	−	X	−	−	−	−	−
F.spp.1414	2011	F. culmorum	Oxfordshire	stalk	−	X	−	−	−	−	−	−	−	−
F.spp.1416	2011	F. culmorum	Shropshire	stalk	−	X	−	−	−	−	−	−	−	−
F.spp.1417	2011	F. culmorum	Shropshire	stalk	−	X	−	−	−	−	−	−	−	−
F.spp.1418	2011	F. culmorum	Devon	stalk	−	X	−	−	−	−	−	−	−	−
F.spp.1419	2011	F. culmorum	Devon	stalk	−	X	−	−	−	−	−	−	−	−
F.spp.1420	2011	F. graminearum	Devon	stalk	−	−	−	−	X	−	−	−	−	−
F.spp.1421	2011	F. graminearum	Shropshire	stalk	−	−	−	−	X	−	−	−	−	−
F.spp.1422	2011	F. culmorum	Shropshire	stalk	−	X	−	−	−	−	−	−	−	−
F.spp.1423	2011	F. graminearum	Shropshire	stalk	−	−	−	−	X	−	−	−	−	−
F.spp.1426	2011	F. culmorum	Shropshire	stalk	−	X	−	−	−	−	−	−	−	−
F.spp.1427	2011	F. culmorum	Shropshire	stalk	−	X	−	−	−	−	−	−	−	−
F.spp.1428	2011	F. culmorum	Shropshire	stalk	−	X	−	−	−	−	−	−	−	−
F.spp.1433	2011	F. oxysporum	Herefordshire	stalk	−	−	−	−	−	X	−	−	−	−
F.spp.1434	2011	F. culmorum	Herefordshire	stalk	−	X	−	−	−	−	−	−	−	−
F.spp.1436	2011	F. graminearum	Sussex	stalk	−	−	−	−	X	−	−	−	−	−
F.spp.1437	2011	F. culmorum	Herefordshire	stalk	−	X	−	−	−	−	−	−	−	−
F.spp.1438	2011	F. culmorum	Herefordshire	stalk	−	X	−	−	−	−	−	−	−	−
F.spp.1439	2011	F. culmorum	Herefordshire	stalk	−	X	−	−	−	−	−	−	−	−
F.spp.1441	2011	F. culmorum	Shropshire	stalk	−	X	−	−	−	−	−	−	−	−
F.spp.1442	2011	F. culmorum	Shropshire	stalk	−	X	−	−	−	−	−	−	−	−
F.spp.1443	2011	F. culmorum	Shropshire	stalk	−	X	−	−	−	−	−	−	−	−
F.spp.1447	2011	F. graminearum	Devon	stalk	−	−	−	−	X	−	−	−	−	−
F.spp.1449	2011	F. culmorum	Herefordshire	stalk	−	X	−	−	−	−	−	−	−	−
F.spp.1450	2011	F. avenaceum	Herefordshire	stalk	X	−	−	−	−	−	−	−	−	−
F.spp.1451	2011	F. graminearum	Oxfordshire	stalk	−	−	−	−	X	−	−	−	−	−
F.spp.1452	2011	F. verticillioides	Oxfordshire	stalk	−	−	−	−	−	−	−	−	−	X
F.spp.1456	2011	F. graminearum	Somerset	stalk	−	−	−	−	X	−	−	−	−	−
F.spp.1458	2011	F. culmorum	Shropshire	stalk	−	X	−	−	−	−	−	−	−	−
F.spp.1460	2011	F. culmorum	Somerset	stalk	−	X	−	−	−	−	−	−	−	−
F.spp.1464	2011	F. culmorum	Herefordshire	stalk	−	X	−	−	−	−	−	−	−	−
F.spp.1468	2011	F. graminearum	Devon	stalk	−	−	−	−	X	−	−	−	−	−
F.spp.1469	2011	F. culmorum	Devon	stalk	−	X	−	−	−	−	−	−	−	−
F.spp.1471	2011	F. graminearum	Devon	stalk	−	−	−	−	X	−	−	−	−	−
F.spp.1473	2011	F. culmorum	Herefordshire	stalk	−	X	−	−	−	−	−	−	−	−
F.spp.1474	2011	F. culmorum	Herefordshire	stalk	−	X	−	−	−	−	−	−	−	−
F.spp.1476	2011	F. graminearum	Devon	stalk	−	−	−	−	X	−	−	−	−	−
F.spp.1477	2011	F. graminearum	Devon	stalk	−	−	−	−	X	−	−	−	−	−
F.spp.1479	2011	F. culmorum	Somerset	stalk	−	X	−	−	−	−	−	−	−	−
F.spp.1480	2011	F. graminearum	Oxfordshire	stalk	−	−	−	−	X	−	−	−	−	−
F.spp.1481	2011	F. culmorum	Oxfordshire	stalk	−	X	−	−	−	−	−	−	−	−
F.spp.1485	2011	F. solani	Devon	stalk	−	−	−	−	−	−	−	−	−	−
F.spp.1489	2011	F. graminearum	Somerset	seed	−	−	−	−	X	−	−	−	−	−
F.spp.1490	2011	F. graminearum	Somerset	seed	−	−	−	−	X	−	−	−	−	−
F.spp.1491	2011	F. poae	Oxfordshire	seed	−	−	−	−	−	−	X	−	−	−
F.spp.1493	2011	F. solani	Oxfordshire	seed	−	−	−	−	−	−	−	−	−	−
F.spp.1494	2011	F. graminearum	Oxfordshire	stalk	−	−	−	−	X	−	−	−	−	−
F.spp.1496	2011	F. cerealis	Shropshire	stalk	−	−	X	−	−	−	−	−	−	−
F.spp.1497	2011	F. cerealis	Oxfordshire	stalk	−	−	X	−	−	−	−	−	−	−
F.spp.1498	2011	F. graminearum	Oxfordshire	stalk	−	−	−	−	X	−	−	−	−	−
F.spp.1499	2011	F. culmorum	Oxfordshire	stalk	−	X	−	−	−	−	−	−	−	−
F.spp.1503	2011	F. culmorum	Oxfordshire	stalk	−	X	−	−	−	−	−	−	−	−
F.spp.1505	2011	F. graminearum	Oxfordshire	stalk	−	−	−	−	X	−	−	−	−	−
F.spp.1506	2011	F. langsethiae	Oxfordshire	stalk	−	−	−	−	−	−	−	−	−	−
F.spp.1507	2011	F. graminearum	Devon	stalk	−	−	−	−	X	−	−	−	−	−
F.spp.1508	2011	F. avenaceum	Herefordshire	stalk	X	−	−	−	−	−	−	−	−	−
F.spp.1511	2011	F. culmorum	Herefordshire	stalk	−	X	−	−	−	−	−	−	−	−
F.spp.1513	2011	F. graminearum	Shropshire	seed	−	−	−	−	X	−	−	−	−	−
F.spp.1514	2011	F. graminearum	Oxfordshire	seed	−	−	−	−	X	−	−	−	−	−
F.spp.1515	2011	F. graminearum	Oxfordshire	seed	−	−	−	−	X	−	−	−	−	−
F.spp.1516	2011	F. culmorum	Oxfordshire	seed	−	X	−	−	−	−	−	−	−	−
F.spp.1520	2011	F. graminearum	Devon	stalk	−	−	−	−	X	−	−	−	−	−
F.spp.1522	2011	F. culmorum	Somerset	stalk	−	X	−	−	−	−	−	−	−	−
F.spp.1523	2011	F. solani	Somerset	stalk	−	−	−	−	−	−	−	−	−	−
F.spp.1526	2011	F. culmorum	Shropshire	stalk	−	X	−	−	−	−	−	−	−	−
F.spp.1531	2011	F. culmorum	Shropshire	stalk	−	X	−	−	−	−	−	−	−	−
F.spp.1533	2011	F. graminearum	Oxfordshire	stalk	−	−	−	−	X	−	−	−	−	−
F.spp.1536	2011	F. culmorum	Somerset	stalk	−	X	−	−	−	−	−	−	−	−
F.spp.1537	2011	F. culmorum	Shropshire	stalk	−	X	−	−	−	−	−	−	−	−
F.spp.1539	2011	F. graminearum	Devon	seed	−	−	−	−	X	−	−	−	−	−
F.spp.1541	2011	F. graminearum	Devon	stalk	−	−	−	−	X	−	−	−	−	−
F.spp.1542	2011	F. solani	Devon	stalk	−	−	−	−	−	−	−	−	−	−
F.spp.1544	2011	F. culmorum	Shropshire	stalk	−	X	−	−	−	−	−	−	−	−
F.spp.1545	2011	F. culmorum	Shropshire	stalk	−	X	−	−	−	−	−	−	−	−
F.spp.1546	2011	F. culmorum	Oxfordshire	stalk	−	X	−	−	−	−	−	−	−	−
F.spp.1547	2011	F. graminearum	Oxfordshire	seed	−	−	−	−	X	−	−	−	−	−
F.spp.1549	2011	F. poae	Oxfordshire	seed	−	−	−	−	−	−	X	−	−	−
F.spp.1551	2011	F. verticillioides	Devon	stalk	−	−	−	−	−	−	−	−	−	X
F.spp.1553	2011	F. solani	Devon	stalk	−	−	−	−	−	−	−	−	−	−
F.spp.1554	2011	F. culmorum	Sussex	stalk	−	X	−	−	−	−	−	−	−	−
F.spp.1555	2011	F. graminearum	Sussex	stalk	−	−	−	−	X	−	−	−	−	−
F.spp.1557	2011	F. culmorum	Oxfordshire	stalk	−	X	−	−	−	−	−	−	−	−
F.spp.1560	2011	F. graminearum	Oxfordshire	stalk	−	−	−	−	X	−	−	−	−	−
F.spp.1561	2011	F. culmorum	Somerset	stalk	−	X	−	−	−	−	−	−	−	−
F.spp.1562	2011	F. culmorum	Somerset	stalk	−	X	−	−	−	−	−	−	−	−
F.spp.1563	2011	F. poae	Somerset	seed	−	−	−	−	−	−	X	−	−	−
F.spp.1564	2011	F. avenaceum	Herefordshire	seed	X	−	−	−	−	−	−	−	−	−
F.spp.1565	2011	F. avenaceum	Herefordshire	seed	X	−	−	−	−	−	−	−	−	−
F.spp.1566	2011	F. solani	Oxfordshire	seed	−	−	−	−	−	−	−	−	−	−
F.spp.1567	2011	F. culmorum	Somerset	seed	−	X	−	−	−	−	−	−	−	−
F.spp.1568	2011	F. culmorum	Somerset	seed	−	X	−	−	−	−	−	−	−	−
F.spp.1569	2011	F. poae	Somerset	seed	−	−	−	−	−	−	X	−	−	−
F.spp.1570	2011	F. graminearum	Oxfordshire	seed	−	−	−	−	X	−	−	−	−	−
F.spp.1571	2011	F. poae	Somerset	seed	−	−	−	−	−	−	X	−	−	−
F.spp.1572	2011	F. poae	Somerset	seed	−	−	−	−	−	−	X	−	−	−
F.spp.1573	2011	F. culmorum	Somerset	seed	−	X	−	−	−	−	−	−	−	−
F.spp.1574	2011	F. cerealis	Somerset	seed	−	−	X	−	−	−	−	−	−	−
F.spp.1577	2011	F. culmorum	Somerset	stalk	−	X	−	−	−	−	−	−	−	−
F.spp.1579	2011	F. culmorum	Devon	stalk	−	X	−	−	−	−	−	−	−	−
F.spp.1580	2011	F. culmorum	Herefordshire	stalk	−	X	−	−	−	−	−	−	−	−
F.spp.1581	2011	F. graminearum	Sussex	stalk	−	−	−	−	X	−	−	−	−	−
F.spp.1582	2011	F. oxysporum	Shropshire	stalk	−	−	−	−	−	X	−	−	−	−
F.spp.1583	2011	F. culmorum	Shropshire	stalk	−	X	−	−	−	−	−	−	−	−
F.spp.1584	2011	F. culmorum	Shropshire	stalk	−	X	−	−	−	−	−	−	−	−
F.spp.1586	2011	F. graminearum	Somerset	stalk	−	−	−	−	X	−	−	−	−	−
F.spp.1590	2011	F. graminearum	Sussex	stalk	−	−	−	−	X	−	−	−	−	−
F.spp.1591	2011	F. graminearum	Sussex	stalk	−	−	−	−	X	−	−	−	−	−
F.spp.1592	2011	F. culmorum	Sussex	stalk	−	X	−	−	−	−	−	−	−	−
F.spp.1593	2011	F. culmorum	Sussex	stalk	−	X	−	−	−	−	−	−	−	−
F.spp.1594	2011	F. solani	Shropshire	stalk	−	−	−	−	−	−	−	−	−	−
F.spp.1595	2011	F. oxysporum	Herefordshire	stalk	−	−	−	−	−	X	−	−	−	−
F.spp.1597	2011	F. culmorum	Shropshire	stalk	−	X	−	−	−	−	−	−	−	−
F.spp.1603	2011	F. culmorum	Sussex	stalk	−	X	−	−	−	−	−	−	−	−
F.spp.1604	2011	F. solani	Herefordshire	stalk	−	−	−	−	−	−	−	−	−	−
F.spp.1605	2011	F. solani	Herefordshire	stalk	−	−	−	−	−	−	−	−	−	−
F.spp.1610	2011	F. graminearum	Sussex	stalk	−	−	−	−	X	−	−	−	−	−
F.spp.1611	2011	F. graminearum	Oxfordshire	stalk	−	−	−	−	X	−	−	−	−	−
F.spp.1617	2011	F. graminearum	Oxfordshire	stalk	−	−	−	−	X	−	−	−	−	−
F.spp.1621	2011	F. graminearum	Sussex	stalk	−	−	−	−	X	−	−	−	−	−
F.spp.1623	2011	F. graminearum	Sussex	stalk	−	−	−	−	X	−	−	−	−	−
F.spp.1624	2011	F. culmorum	Sussex	stalk	−	X	−	−	−	−	−	−	−	−
F.spp.1626	2011	F. culmorum	Devon	stalk	−	X	−	−	−	−	−	−	−	−
F.spp.1627	2011	F. graminearum	Devon	stalk	−	−	−	−	X	−	−	−	−	−
F.spp.1628	2011	F. culmorum	Herefordshire	stalk	−	X	−	−	−	−	−	−	−	−
F.spp.1629	2011	F. graminearum	herefordshire	stalk	−	−	−	−	X	−	−	−	−	−
F.spp.1630	2011	F. culmorum	Devon	stalk	−	X	−	−	−	−	−	−	−	−
F.spp.1633	2011	F. culmorum	Devon	stalk	−	X	−	−	−	−	−	−	−	−
F.spp.1635	2011	F. culmorum	Herefordshire	stalk	−	X	−	−	−	−	−	−	−	−
F.spp.1636	2011	F. culmorum	Shropshire	stalk	−	X	−	−	−	−	−	−	−	−
F.spp.1637	2011	F. culmorum	Devon	stalk	−	X	−	−	−	−	−	−	−	−
F.spp.1638	2011	F. graminearum	Sussex	stalk	−	−	−	−	X	−	−	−	−	−
F.spp.1639	2011	F. graminearum	Sussex	stalk	−	−	−	−	X	−	−	−	−	−
F.spp.1640	2011	F. graminearum	Sussex	stalk	−	−	−	−	X	−	−	−	−	−
F.spp.1643	2011	F. graminearum	Devon	stalk	−	−	−	−	X	−	−	−	−	−
F.spp.1646	2011	F. verticillioides	Devon	stalk	−	−	−	−	−	−	−	−	−	X
F.spp.1648	2011	F. culmorum	Devon	stalk	−	X	−	−	−	−	−	−	−	−
F.spp.1649	2011	F. culmorum	Somerset	stalk	−	X	−	−	−	−	−	−	−	−
F.spp.1651	2011	F. culmorum	Somerset	stalk	−	X	−	−	−	−	−	−	−	−
F.spp.1652	2011	F. culmorum	Somerset	stalk	−	X	−	−	−	−	−	−	−	−
F.spp.1653	2011	F. solani	Somerset	stalk	−	−	−	−	−	−	−	−	−	−
F.spp.1654	2011	F. graminearum	Somerset	stalk	−	−	−	−	X	−	−	−	−	−
F.spp.1655	2011	F. culmorum	Somerset	stalk	−	X	−	−	−	−	−	−	−	−
F.spp.1656	2011	F. culmorum	Herefordshire	seed	−	X	−	−	−	−	−	−	−	−
F.spp.1659	2011	F. graminearum	Sussex	seed	−	−	−	−	X	−	−	−	−	−
F.spp.1660	2011	F. poae	Herefordshire	seed	−	−	−	−	−	−	X	−	−	−
F.spp.1661	2011	F. graminearum	Oxfordshire	seed	−	−	−	−	X	−	−	−	−	−
F.spp.1662	2011	F. graminearum	Oxfordshire	seed	−	−	−	−	X	−	−	−	−	−
F.spp.1663	2011	F. graminearum	Oxfordshire	seed	−	−	−	−	X	−	−	−	−	−
F.spp.1664	2011	F. graminearum	Oxfordshire	seed	−	−	−	−	X	−	−	−	−	−
F.spp.1666	2011	F. cerealis	Devon	seed	−	−	X	−	−	−	−	−	−	−
F.spp.1667	2011	F. culmorum	Shropshire	seed	−	X	−	−	−	−	−	−	−	−
F.spp.1669	2011	F. culmorum	Shropshire	seed	−	X	−	−	−	−	−	−	−	−
F.spp.1670	2011	F. graminearum	Oxfordshire	seed	−	−	−	−	X	−	−	−	−	−
F.spp.1671	2011	F. graminearum	Oxfordshire	seed	−	−	−	−	X	−	−	−	−	−
F.spp.1673	2011	F. graminearum	Sussex	seed	−	−	−	−	X	−	−	−	−	−
F.spp.1674	2011	F. culmorum	Shropshire	seed	−	X	−	−	−	−	−	−	−	−
F.spp.1675	2011	F. graminearum	Shropshire	seed	−	−	−	−	X	−	−	−	−	−
F.spp.1676	2011	F. graminearum	Sussex	seed	−	−	−	−	X	−	−	−	−	−
F.spp.1685	2011	F. graminearum	Sussex	seed	−	−	−	−	X	−	−	−	−	−
F.spp.1686	2011	F. culmorum	Herefordshire	seed	−	X	−	−	−	−	−	−	−	−
F.spp.1687	2011	F. avenaceum	Herefordshire	seed	X	−	−	−	−	−	−	−	−	−
F.spp.1688	2011	F. culmorum	Herefordshire	seed	−	X	−	−	−	−	−	−	−	−
F.spp.1692	2011	F. poae	Oxfordshire	seed	−	−	−	−	−	−	X	−	−	−
F.spp.1694	2011	F. culmorum	Shropshire	seed	−	X	−	−	−	−	−	−	−	−
F.spp.1695	2011	F. culmorum	Sussex	seed	−	X	−	−	−	−	−	−	−	−
F.spp.1697	2011	F. culmorum	Shropshire	seed	−	X	−	−	−	−	−	−	−	−
F.spp.1699	2011	F. graminearum	Shropshire	seed	−	−	−	−	X	−	−	−	−	−
F.spp.1700	2011	F. proliferatrum	Oxfordshire	seed	−	−	−	−	−	−	−	X	−	−
F.spp.1701	2011	F. poae	Sussex	seed	−	−	−	−	−	−	X	−	−	−
F.spp.1702	2011	F. culmorum	Herefordshire	seed	−	X	−	−	−	−	−	−	−	−
F.spp.1703	2011	F. culmorum	Herefordshire	seed	−	X	−	−	−	−	−	−	−	−
F.spp.1704	2011	F. graminearum	Devon	seed	−	−	−	−	X	−	−	−	−	−
F.spp.1705	2011	F. graminearum	Devon	seed	−	−	−	−	X	−	−	−	−	−
F.spp.1707	2011	F. poae	Somerset	seed	−	−	−	−	−	−	X	−	−	−
F.spp.1708	2011	F. poae	Somerset	seed	−	−	−	−	−	−	X	−	−	−
F.spp.1709	2011	F. poae	Somerset	seed	−	−	−	−	−	−	X	−	−	−
F.spp.1710	2011	F. poae	Somerset	seed	−	−	−	−	−	−	X	−	−	−
F.spp.1712	2011	F. poae	Somerset	seed	−	−	−	−	−	−	X	−	−	−
F.spp.1713	2011	F. culmorum	Sussex	seed	−	X	−	−	−	−	−	−	−	−
F.spp.1714	2011	F. graminearum	Oxfordshire	seed	−	−	−	−	X	−	−	−	−	−
F.spp.1715	2011	F. culmorum	Shropshire	seed	−	X	−	−	−	−	−	−	−	−
F.spp.1716	2011	F. culmorum	Shropshire	seed	−	X	−	−	−	−	−	−	−	−
F.spp.1717	2011	F. culmorum	Shropshire	seed	−	X	−	−	−	−	−	−	−	−
F.spp.1718	2011	F. graminearum	Oxfordshire	seed	−	−	−	−	X	−	−	−	−	−
F.spp.1719	2011	F. culmorum	Shropshire	seed	−	X	−	−	−	−	−	−	−	−
F.spp.1720	2011	F. graminearum	Somerset	seed	−	−	−	−	X	−	−	−	−	−
F.spp.1721	2011	F. culmorum	Sussex	seed	−	X	−	−	−	−	−	−	−	−
F.spp.1722	2011	F. graminearum	Sussex	seed	−	−	−	−	X	−	−	−	−	−
F.spp.1723	2011	F. culmorum	Herefordshire	seed	−	X	−	−	−	−	−	−	−	−
F.spp.1724	2011	F. culmorum	Herefordshire	seed	−	X	−	−	−	−	−	−	−	−
F.spp.1725	2011	F. solani	Oxfordshire	seed	−	−	−	−	−	−	−	−	−	−
F.spp.1726	2011	F. graminearum	Oxfordshire	seed	−	−	−	−	X	−	−	−	−	−
F.spp.1734	2011	F. graminearum	Oxfordshire	seed	−	−	−	−	X	−	−	−	−	−
F.spp.1735	2011	F. graminearum	Oxfordshire	seed	−	−	−	−	X	−	−	−	−	−
F.spp.1738	2011	F. poae	Somerset	seed	−	−	−	−	−	−	X	−	−	−
F.spp.1740	2011	F. graminearum	Sussex	seed	−	−	−	−	X	−	−	−	−	−
F.spp.1741	2011	F. poae	Somerset	seed	−	−	−	−	−	−	X	−	−	−
F.spp.1742	2011	F. culmorum	Shropshire	seed	−	X	−	−	−	−	−	−	−	−
F.spp.1743	2011	F. culmorum	Shropshire	seed	−	X	−	−	−	−	−	−	−	−
F.spp.1744	2011	F. graminearum	Oxfordshire	seed	−	−	−	−	X	−	−	−	−	−
F.spp.1745	2011	F. graminearum	Oxfordshire	seed	−	−	−	−	X	−	−	−	−	−
F.spp.1746	2011	F. graminearum	Oxfordshire	seed	−	−	−	−	X	−	−	−	−	−
F.spp.1747	2011	F. solani	Oxfordshire	seed	−	−	−	−	−	−	−	−	−	−
F.spp.1748	2011	F. graminearum	Oxfordshire	seed	−	−	−	−	X	−	−	−	−	−
F.spp.1749	2011	F. graminearum	Oxfordshire	seed	−	−	−	−	X	−	−	−	−	−
F.spp.1750	2011	F. culmorum	Sussex	seed	−	X	−	−	−	−	−	−	−	−
F.spp.1752	2011	F. culmorum	Shropshire	seed	−	X	−	−	−	−	−	−	−	−
F.spp.1757	2011	F. culmorum	Shropshire	seed	−	X	−	−	−	−	−	−	−	−
F.spp.1761	2011	F. graminearum	Oxfordshire	seed	−	−	−	−	X	−	−	−	−	−
F.spp.1762	2011	F. graminearum	Oxfordshire	seed	−	−	−	−	X	−	−	−	−	−
F.spp.1765	2011	F. graminearum	Oxfordshire	seed	−	−	−	−	X	−	−	−	−	−
F.spp.1766	2011	F. solani	Herefordshire	seed	−	−	−	−	−	−	−	−	−	−
F.spp.1768	2011	F. culmorum	Herefordshire	seed	−	X	−	−	−	−	−	−	−	−
F.spp.1769	2011	F. culmorum	Herefordshire	seed	−	X	−	−	−	−	−	−	−	−
F.spp.1771	2011	F. poae	Oxfordshire	seed	−	−	−	−	−	−	X	−	−	−
F.spp.1772	2011	F. graminearum	Oxfordshire	seed	−	−	−	−	X	−	−	−	−	−
F.spp.1773	2011	F. graminearum	Oxfordshire	seed	−	−	−	−	X	−	−	−	−	−
F.spp.1774	2011	F. graminearum	Sussex	seed	−	−	−	−	X	−	−	−	−	−
F.spp.1776	2011	F. poae	Oxfordshire	seed	−	−	−	−	−	−	X	−	−	−
F.spp.1777	2011	F. poae	Oxfordshire	seed	−	−	−	−	−	−	X	−	−	−
F.spp.1778	2011	F. solani	Oxfordshire	seed	−	−	−	−	−	−	−	−	−	−
F.spp.1779	2011	F. culmorum	Shropshire	seed	−	X	−	−	−	−	−	−	−	−
F.spp.1780	2011	F. culmorum	Shropshire	seed	−	X	−	−	−	−	−	−	−	−
F.spp.1781	2011	F. culmorum	Shropshire	seed	−	X	−	−	−	−	−	−	−	−
F.spp.1782	2011	F. graminearum	Oxfordshire	seed	−	−	−	−	X	−	−	−	−	−
F.spp.1783	2011	F. culmorum	Devon	seed	−	X	−	−	−	−	−	−	−	−
F.spp.1784	2011	F. culmorum	Shropshire	seed	−	X	−	−	−	−	−	−	−	−
F.spp.1785	2011	F. culmorum	Oxfordshire	seed	−	X	−	−	−	−	−	−	−	−
F.spp.1786	2011	F. culmorum	Shropshire	seed	−	X	−	−	−	−	−	−	−	−
F.spp.1788	2011	F. culmorum	Shropshire	seed	−	X	−	−	−	−	−	−	−	−
F.spp.1789	2011	F. culmorum	Shropshire	seed	−	X	−	−	−	−	−	−	−	−
F.spp.1790	2011	F. graminearum	Devon	seed	−	−	−	−	X	−	−	−	−	−
F.spp.1791	2011	F. solani	Devon	seed	−	−	−	−	−	−	−	−	−	−
F.spp.1794	2011	F. poae	Oxfordshire	seed	−	−	−	−	−	−	X	−	−	−
F.spp.1795	2011	F. graminearum	Oxfordshire	seed	−	−	−	−	X	−	−	−	−	−
F.spp.1796	2011	F. solani	Somerset	seed	−	−	−	−	−	−	−	−	−	−
F.spp.1797	2011	F. culmorum	Herefordshire	seed	−	X	−	−	−	−	−	−	−	−
F.spp.1798	2011	F. culmorum	Sussex	seed	−	X	−	−	−	−	−	−	−	−
F.spp.1800	2011	F. graminearum	Somerset	seed	−	−	−	−	X	−	−	−	−	−
F.spp.1802	2011	F. culmorum	Herefordshire	seed	−	X	−	−	−	−	−	−	−	−
F.spp.1804	2011	F. culmorum	Herefordshire	seed	−	X	−	−	−	−	−	−	−	−
F.spp.1806	2011	F. solani	Herefordshire	seed	−	−	−	−	−	−	−	−	−	−
F.spp.1807	2011	F. graminearum	Herefordshire	seed	−	−	−	−	X	−	−	−	−	−
F.spp.1808	2011	F. graminearum	Sussex	seed	−	−	−	−	X	−	−	−	−	−
F.spp.1809	2011	F. solani	Herefordshire	seed	−	−	−	−	−	−	−	−	−	−
F.spp.1810	2011	F. graminearum	herefordshire	seed	−	−	−	−	X	−	−	−	−	−
F.spp.1815	2011	F. solani	Somerset	seed	−	−	−	−	−	−	−	−	−	−
F.spp.1816	2011	F. solani	Somerset	seed	−	−	−	−	−	−	−	−	−	−
F.spp.1817	2011	F. proliferatrum	Somerset	seed	−	−	−	−	−	−	−	X	−	−
F.spp.1819	2011	F. culmorum	Sussex	seed	−	X	−	−	−	−	−	−	−	−
F.spp.1821	2011	F. graminearum	Oxfordshire	seed	−	−	−	−	X	−	−	−	−	−
F.spp.1822	2011	F. solani	Devon	seed	−	−	−	−	−	−	−	−	−	−
F.spp.1825	2011	F. poae	Somerset	seed	−	−	−	−	−	−	X	−	−	−
F.spp.1826	2011	F. culmorum	Shropshire	seed	−	X	−	−	−	−	−	−	−	−
F.spp.1827	2011	F. graminearum	Oxfordshire	seed	−	−	−	−	X	−	−	−	−	−
F.spp.1828	2011	F. culmorum	Oxfordshire	seed	−	X	−	−	−	−	−	−	−	−
F.spp.1831	2011	F. langsethiae	Herefordshire	seed	−	−	−	−	−	−	−	−	−	−
F.spp.1832	2011	F. poae	Devon	seed	−	−	−	−	−	−	X	−	−	−
F.spp.1835	2011	F. poae	Somerset	seed	−	−	−	−	−	−	X	−	−	−
F.spp.1836	2011	F. graminearum	Devon	seed	−	−	−	−	X	−	−	−	−	−
F.spp.1837	2011	F. solani	Devon	seed	−	−	−	−	−	−	−	−	−	−
F.spp.1838	2011	F. culmorum	Shropshire	seed	−	X	−	−	−	−	−	−	−	−
F.spp.1839	2011	F. culmorum	Shropshire	seed	−	X	−	−	−	−	−	−	−	−
F.spp.1840	2011	F. culmorum	Shropshire	seed	−	X	−	−	−	−	−	−	−	−
F.spp.1841	2011	F. poae	Devon	seed	−	−	−	−	−	−	X	−	−	−
F.spp.1842	2011	F. graminearum	Devon	seed	−	−	−	−	X	−	−	−	−	−
F.spp.1843	2011	F. culmorum	Devon	seed	−	X	−	−	−	−	−	−	−	−
F.spp.1844	2011	F. graminearum	Devon	seed	−	−	−	−	X	−	−	−	−	−
F.spp.1845	2011	F. solani	Herefordshire	seed	−	−	−	−	−	−	−	−	−	−
F.spp.1846	2011	F. solani	Sussex	seed	−	−	−	−	−	−	−	−	−	−
F.spp.1847	2011	F. culmorum	Sussex	seed	−	X	−	−	−	−	−	−	−	−
F.spp.1848	2011	F. graminearum	Somerset	seed	−	−	−	−	X	−	−	−	−	−
F.spp.1851	2011	F. graminearum	Devon	stalk	−	−	−	−	X	−	−	−	−	−
F.spp.1853	2011	F. avenaceum	Lincolnshire	stalk	X	−	−	−	−	−	−	−	−	−
F.spp.1854	2011	F. graminearum	Lincolnshire	stalk	−	−	−	−	X	−	−	−	−	−
F.spp.1855	2011	F. graminearum	Lincolnshire	stalk	−	−	−	−	X	−	−	−	−	−
F.spp.1859	2011	F. graminearum	Devon	stalk	−	−	−	−	X	−	−	−	−	−
F.spp.1861	2011	F. oxysporum	Lincolnshire	stalk	−	−	−	−	−	X	−	−	−	−
F.spp.1862	2011	F. solani	Herefordshire	stalk	−	−	−	−	−	−	−	−	−	−
F.spp.1865	2011	F. solani	Lincolnshire	stalk	−	−	−	−	−	−	−	−	−	−
F.spp.1867	2011	F. graminearum	Lincolnshire	stalk	−	−	−	−	X	−	−	−	−	−
F.spp.1868	2011	F. graminearum	Lincolnshire	stalk	−	−	−	−	X	−	−	−	−	−
F.spp.1869	2011	F. graminearum	Lincolnshire	stalk	−	−	−	−	X	−	−	−	−	−
F.spp.1870	2011	F. graminearum	Lincolnshire	stalk	−	−	−	−	X	−	−	−	−	−
F.spp.1873	2011	F. culmorum	Herefordshire	stalk	−	X	−	−	−	−	−	−	−	−
F.spp.1875	2011	F. solani	Herefordshire	stalk	−	−	−	−	−	−	−	−	−	−
F.spp.1876	2011	F. solani	Lincolnshire	stalk	−	−	−	−	−	−	−	−	−	−
F.spp.1877	2011	F. graminearum	Nottinghamshire	stalk	−	−	−	−	X	−	−	−	−	−
F.spp.1878	2011	F. oxysporum	Nottinghamshire	stalk	−	−	−	−	−	X	−	−	−	−
F.spp.1880	2011	F. solani	Lincolnshire	stalk	−	−	−	−	−	−	−	−	−	−
F.spp.1881	2011	F. solani	Lincolnshire	stalk	−	−	−	−	−	−	−	−	−	−
F.spp.1882	2011	F. graminearum	Lincolnshire	stalk	−	−	−	−	X	−	−	−	−	−
F.spp.1883	2011	F. solani	Nottinghamshire	stalk	−	−	−	−	−	−	−	−	−	−
F.spp.1885	2011	F. culmorum	Nottinghamshire	stalk	−	X	−	−	−	−	−	−	−	−
F.spp.1886	2011	F. culmorum	Nottinghamshire	stalk	−	X	−	−	−	−	−	−	−	−
F.spp.1889	2011	F. culmorum	Nottinghamshire	stalk	−	X	−	−	−	−	−	−	−	−
F.spp.1891	2011	F. culmorum	Nottinghamshire	stalk	−	X	−	−	−	−	−	−	−	−
F.spp.1892	2011	F. graminearum	Nottinghamshire	stalk	−	−	−	−	X	−	−	−	−	−
F.spp.1896	2011	F. culmorum	Nottinghamshire	stalk	−	X	−	−	−	−	−	−	−	−
F.spp.1897	2011	F. graminearum	Nottinghamshire	stalk	−	−	−	−	X	−	−	−	−	−
F.spp.1901	2011	F. oxysporum	Nottinghamshire	stalk	−	−	−	−	−	X	−	−	−	−
F.spp.1905	2011	F. graminearum	Lincolnshire	stalk	−	−	−	−	X	−	−	−	−	−
F.spp.1908	2011	F. culmorum	Lincolnshire	stalk	−	X	−	−	−	−	−	−	−	−
F.spp.1909	2011	F. culmorum	Herefordshire	stalk	−	X	−	−	−	−	−	−	−	−
F.spp.1911	2011	F. graminearum	Oxfordshire	seed	−	−	−	−	X	−	−	−	−	−
F.spp.1912	2011	F. culmorum	Shropshire	seed	−	X	−	−	−	−	−	−	−	−
F.spp.1913	2011	F. culmorum	Sussex	seed	−	X	−	−	−	−	−	−	−	−
F.spp.1914	2011	F. graminearum	herefordshire	stalk	−	−	−	−	X	−	−	−	−	−
F.spp.1915	2011	F. solani	Lincolnshire	stalk	−	−	−	−	−	−	−	−	−	−
F.spp.1917	2011	F. graminearum	Lincolnshire	stalk	−	−	−	−	X	−	−	−	−	−
F.spp.1918	2011	F. solani	Lincolnshire	stalk	−	−	−	−	−	−	−	−	−	−
F.spp.1920	2011	F. culmorum	Nottinghamshire	stalk	−	X	−	−	−	−	−	−	−	−
F.spp.1921	2011	F. graminearum	Oxfordshire	seed	−	−	−	−	X	−	−	−	−	−
F.spp.1922	2011	F. solani	Devon	seed	−	−	−	−	−	−	−	−	−	−
F.spp.1923	2011	F. solani	Devon	seed	−	−	−	−	−	−	−	−	−	−
F.spp.1924	2011	F. culmorum	Devon	seed	−	X	−	−	−	−	−	−	−	−
F.spp.1925	2011	F. culmorum	Sussex	seed	−	X	−	−	−	−	−	−	−	−
F.spp.1926	2011	F. culmorum	Nottinghamshire	stalk	−	X	−	−	−	−	−	−	−	−
F.spp.1929	2011	F. graminearum	Somerset	stalk	−	−	−	−	X	−	−	−	−	−
F.spp.1931	2011	F. graminearum	Somerset	stalk	−	−	−	−	X	−	−	−	−	−
F.spp.1934	2011	F. culmorum	Nottinghamshire	stalk	−	X	−	−	−	−	−	−	−	−
F.spp.1935	2011	F. culmorum	Nottinghamshire	stalk	−	X	−	−	−	−	−	−	−	−
F.spp.1936	2011	F. culmorum	Devon	stalk	−	X	−	−	−	−	−	−	−	−
F.spp.1937	2011	F. culmorum	Herefordshire	stalk	−	X	−	−	−	−	−	−	−	−
F.spp.1938	2011	F. graminearum	Devon	stalk	−	−	−	−	X	−	−	−	−	−
F.spp.1939	2011	F. culmorum	Lincolnshire	stalk	−	X	−	−	−	−	−	−	−	−
F.spp.1941	2011	F. graminearum	Nottinghamshire	stalk	−	−	−	−	X	−	−	−	−	−
F.spp.1943	2011	F. culmorum	Devon	stalk	−	X	−	−	−	−	−	−	−	−
F.spp.1944	2011	F. culmorum	Devon	stalk	−	X	−	−	−	−	−	−	−	−
F.spp.1947	2011	F. graminearum	Devon	stalk	−	−	−	−	X	−	−	−	−	−
F.spp.1948	2011	F. graminearum	Lincolnshire	stalk	−	−	−	−	X	−	−	−	−	−
F.spp.1949	2011	F. cerealis	Somerset	stalk	−	−	X	−	−	−	−	−	−	−
F.spp.1950	2011	F. culmorum	Lincolnshire	stalk	−	X	−	−	−	−	−	−	−	−
F.spp.1953	2011	F. graminearum	Lincolnshire	stalk	−	−	−	−	X	−	−	−	−	−
F.spp.1954	2011	F. culmorum	Somerset	stalk	−	X	−	−	−	−	−	−	−	−
F.spp.1958	2011	F. solani	Lincolnshire	stalk	−	−	−	−	−	−	−	−	−	−
F.spp.1961	2011	F. culmorum	Nottinghamshire	stalk	−	X	−	−	−	−	−	−	−	−
F.spp.1964	2011	F. graminearum	Nottinghamshire	stalk	−	−	−	−	X	−	−	−	−	−
F.spp.1965	2011	F. solani	Nottinghamshire	stalk	−	−	−	−	−	−	−	−	−	−
F.spp.1967	2011	F. graminearum	Devon	stalk	−	−	−	−	X	−	−	−	−	−
F.spp.1968	2011	F. graminearum	Devon	stalk	−	−	−	−	X	−	−	−	−	−
F.spp.1970	2011	F. culmorum	Nottinghamshire	stalk	−	X	−	−	−	−	−	−	−	−
F.spp.1971	2011	F. solani	Nottinghamshire	stalk	−	−	−	−	−	−	−	−	−	−
F.spp.1972	2011	F. graminearum	Lincolnshire	stalk	−	−	−	−	X	−	−	−	−	−
F.spp.1975	2011	F. culmorum	Nottinghamshire	stalk	−	X	−	−	−	−	−	−	−	−
F.spp.1976	2011	F. graminearum	Nottinghamshire	stalk	−	−	−	−	X	−	−	−	−	−
F.spp.1978	2011	F. culmorum	Lincolnshire	stalk	−	X	−	−	−	−	−	−	−	−
F.spp.1980	2011	F. culmorum	Lincolnshire	stalk	−	X	−	−	−	−	−	−	−	−
F.spp.1981	2011	F. culmorum	Nottinghamshire	stalk	−	X	−	−	−	−	−	−	−	−
F.spp.1982	2011	F. oxysporum	Nottinghamshire	stalk	−	−	−	−	−	X	−	−	−	−
F.spp.1983	2011	F. graminearum	Nottinghamshire	stalk	−	−	−	−	X	−	−	−	−	−
F.spp.1984	2011	F. culmorum	Nottinghamshire	stalk	−	X	−	−	−	−	−	−	−	−
F.spp.1985	2011	F. graminearum	Nottinghamshire	stalk	−	−	−	−	X	−	−	−	−	−
F.spp.1986	2011	F. culmorum	Somerset	stalk	−	X	−	−	−	−	−	−	−	−
F.spp.1988	2011	F. culmorum	Somerset	stalk	−	X	−	−	−	−	−	−	−	−
F.spp.1989	2011	F. graminearum	Somerset	stalk	−	−	−	−	X	−	−	−	−	−
F.spp.1990	2011	F. graminearum	Somerset	stalk	−	−	−	−	X	−	−	−	−	−
F.spp.1998	2011	F. culmorum	Lincolnshire	stalk	−	X	−	−	−	−	−	−	−	−
F.spp.1999	2011	F. solani	Lincolnshire	stalk	−	−	−	−	−	−	−	−	−	−
F.spp.2000	2011	F. graminearum	Nottinghamshire	stalk	−	−	−	−	X	−	−	−	−	−
F.spp.2001	2011	F. graminearum	Devon	stalk	−	−	−	−	X	−	−	−	−	−
F.spp.2004	2011	F. solani	Lincolnshire	stalk	−	−	−	−	−	−	−	−	−	−
F.spp.2005	2011	F. solani	Herefordshire	stalk	−	−	−	−	−	−	−	−	−	−
F.spp.2006	2011	F. culmorum	Herefordshire	stalk	−	X	−	−	−	−	−	−	−	−
F.spp.2007	2011	F. graminearum	Devon	stalk	−	−	−	−	X	−	−	−	−	−
F.spp.2009	2011	F. graminearum	Devon	stalk	−	−	−	−	X	−	−	−	−	−
F.spp.2010	2011	F. culmorum	Devon	stalk	−	X	−	−	−	−	−	−	−	−
F.spp.2011	2011	F. culmorum	Herefordshire	stalk	−	X	−	−	−	−	−	−	−	−
F.spp.2012	2011	F. culmorum	Herefordshire	stalk	−	X	−	−	−	−	−	−	−	−
F.spp.2013	2011	F. graminearum	Somerset	stalk	−	−	−	−	X	−	−	−	−	−
F.spp.2014	2011	F. culmorum	Somerset	stalk	−	X	−	−	−	−	−	−	−	−
F.spp.2015	2011	F. culmorum	Somerset	stalk	−	X	−	−	−	−	−	−	−	−
F.spp.2016	2011	F. culmorum	Devon	stalk	−	X	−	−	−	−	−	−	−	−
F.spp.2018	2011	F. graminearum	Nottinghamshire	stalk	−	−	−	−	X	−	−	−	−	−
F.spp.2019	2011	F. culmorum	Nottinghamshire	stalk	−	X	−	−	−	−	−	−	−	−
F.spp.2021	2011	F. solani	Herefordshire	stalk	−	−	−	−	−	−	−	−	−	−
F.spp.2022	2011	F. culmorum	Herefordshire	stalk	−	X	−	−	−	−	−	−	−	−
F.spp.2023	2011	F. culmorum	Herefordshire	stalk	−	X	−	−	−	−	−	−	−	−
F.spp.2024	2011	F. avenaceum	Herefordshire	stalk	X	−	−	−	−	−	−	−	−	−
F.spp.2025	2011	F. avenaceum	Herefordshire	stalk	X	−	−	−	−	−	−	−	−	−
F.spp.2027	2011	F. solani	Nottinghamshire	stalk	−	−	−	−	−	−	−	−	−	−
F.spp.2028	2011	F. solani	Herefordshire	seed	−	−	−	−	−	−	−	−	−	−
F.spp.2030	2011	F. culmorum	Herefordshire	seed	−	X	−	−	−	−	−	−	−	−
F.spp.2031	2011	F. culmorum	Herefordshire	seed	−	X	−	−	−	−	−	−	−	−
F.spp.2035	2011	F. solani	Lincolnshire	seed	−	−	−	−	−	−	−	−	−	−
F.spp.2036	2011	F. graminearum	Sussex	seed	−	−	−	−	X	−	−	−	−	−
F.spp.2037	2011	F. graminearum	Sussex	seed	−	−	−	−	X	−	−	−	−	−
F.spp.2038	2011	F. graminearum	Sussex	seed	−	−	−	−	X	−	−	−	−	−
F.spp.2039	2011	F. graminearum	Sussex	seed	−	−	−	−	X	−	−	−	−	−
F.spp.2040	2011	F. graminearum	Devon	seed	−	−	−	−	X	−	−	−	−	−
F.spp.2041	2011	F. avenaceum	Lincolnshire	seed	X	−	−	−	−	−	−	−	−	−
F.spp.2042	2011	F. solani	Lincolnshire	seed	−	−	−	−	−	−	−	−	−	−
F.spp.2045	2011	F. graminearum	Lincolnshire	seed	−	−	−	−	X	−	−	−	−	−
F.spp.2046	2011	F. graminearum	Lincolnshire	seed	−	−	−	−	X	−	−	−	−	−
F.spp.2048	2011	F. graminearum	herefordshire	seed	−	−	−	−	X	−	−	−	−	−
F.spp.2049	2011	F. solani	Herefordshire	seed	−	−	−	−	−	−	−	−	−	−
F.spp.2054	2011	F. culmorum	Nottinghamshire	seed	−	X	−	−	−	−	−	−	−	−
F.spp.2055	2011	F. solani	Nottinghamshire	seed	−	−	−	−	−	−	−	−	−	−
F.spp.2057	2011	F. graminearum	Sussex	seed	−	−	−	−	X	−	−	−	−	−
F.spp.2058	2011	F. culmorum	Sussex	seed	−	X	−	−	−	−	−	−	−	−
F.spp.2059	2011	F. culmorum	Devon	seed	−	X	−	−	−	−	−	−	−	−
F.spp.2060	2011	F. culmorum	Herefordshire	seed	−	X	−	−	−	−	−	−	−	−
F.spp.2061	2011	F. culmorum	Lincolnshire	seed	−	X	−	−	−	−	−	−	−	−
F.spp.2063	2011	F. graminearum	Lincolnshire	seed	−	−	−	−	X	−	−	−	−	−
F.spp.2068	2011	F. graminearum	Lincolnshire	seed	−	−	−	−	X	−	−	−	−	−
F.spp.2073	2011	F. culmorum	Devon	seed	−	X	−	−	−	−	−	−	−	−
F.spp.2074	2011	F. culmorum	Devon	seed	−	X	−	−	−	−	−	−	−	−
F.spp.2077	2011	F. graminearum	Nottinghamshire	seed	−	−	−	−	X	−	−	−	−	−
F.spp.2078	2011	F. graminearum	Nottinghamshire	seed	−	−	−	−	X	−	−	−	−	−
F.spp.2080	2011	F. culmorum	Nottinghamshire	seed	−	X	−	−	−	−	−	−	−	−
F.spp.2081	2011	F. culmorum	Lincolnshire	stalk	−	X	−	−	−	−	−	−	−	−
F.spp.2083	2011	F. cerealis	Shropshire	seed	−	−	X	−	−	−	−	−	−	−
F.spp.2084	2011	F. graminearum	Devon	seed	−	−	−	−	X	−	−	−	−	−
F.spp.2085	2011	F. graminearum	Devon	seed	−	−	−	−	X	−	−	−	−	−
F.spp.2086	2011	F. graminearum	Devon	seed	−	−	−	−	X	−	−	−	−	−
F.spp.2087	2011	F. culmorum	Devon	seed	−	X	−	−	−	−	−	−	−	−
F.spp.2088	2011	F. graminearum	Devon	seed	−	−	−	−	X	−	−	−	−	−
F.spp.2089	2011	F. cerealis	Herefordshire	seed	−	−	X	−	−	−	−	−	−	−
F.spp.2091	2011	F. avenaceum	Lincolnshire	stalk	X	−	−	−	−	−	−	−	−	−
F.spp.2093	2011	F. culmorum	Herefordshire	stalk	−	X	−	−	−	−	−	−	−	−
F.spp.2095	2011	F. graminearum	Lincolnshire	stalk	−	−	−	−	X	−	−	−	−	−
F.spp.2096	2011	F. solani	Herefordshire	stalk	−	−	−	−	−	−	−	−	−	−
F.spp.2099	2011	F. cerealis	Lincolnshire	stalk	−	−	X	−	−	−	−	−	−	−
F.spp.2100	2011	F. solani	Lincolnshire	stalk	−	−	−	−	−	−	−	−	−	−
F.spp.2101	2011	F. culmorum	Nottinghamshire	stalk	−	X	−	−	−	−	−	−	−	−
F.spp.2102	2011	F. avenaceum	Lincolnshire	stalk	X	−	−	−	−	−	−	−	−	−
F.spp.2103	2011	F. culmorum	Lincolnshire	stalk	−	X	−	−	−	−	−	−	−	−
F.spp.2106	2011	F. solani	Herefordshire	stalk	−	−	−	−	−	−	−	−	−	−
F.spp.2107	2011	F. culmorum	Herefordshire	stalk	−	X	−	−	−	−	−	−	−	−
F.spp.2111	2011	F. avenaceum	Nottinghamshire	stalk	X	−	−	−	−	−	−	−	−	−
F.spp.2115	2011	F. oxysporum	Lincolnshire	stalk	−	−	−	−	−	X	−	−	−	−
F.spp.2116	2011	F. oxysporum	Herefordshire	stalk	−	−	−	−	−	X	−	−	−	−
F.spp.2118	2011	F. graminearum	Lincolnshire	stalk	−	−	−	−	X	−	−	−	−	−
F.spp.2119	2011	F. culmorum	Lincolnshire	stalk	−	X	−	−	−	−	−	−	−	−
F.spp.2120	2011	F. solani	Lincolnshire	stalk	−	−	−	−	−	−	−	−	−	−
F.spp.2121	2011	F. culmorum	Nottinghamshire	stalk	−	X	−	−	−	−	−	−	−	−
F.spp.2122	2011	F. graminearum	Devon	stalk	−	−	−	−	X	−	−	−	−	−
F.spp.2125	2011	F. culmorum	Herefordshire	stalk	−	X	−	−	−	−	−	−	−	−
F.spp.2126	2011	F. graminearum	Lincolnshire	stalk	−	−	−	−	X	−	−	−	−	−
F.spp.2127	2011	F. solani	Lincolnshire	stalk	−	−	−	−	−	−	−	−	−	−
F.spp.2129	2011	F. culmorum	Nottinghamshire	stalk	−	X	−	−	−	−	−	−	−	−
F.spp.2130	2011	F. solani	Nottinghamshire	stalk	−	−	−	−	−	−	−	−	−	−
F.spp.2135	2011	F. culmorum	Devon	stalk	−	X	−	−	−	−	−	−	−	−
F.spp.2137	2011	F. culmorum	Devon	stalk	−	X	−	−	−	−	−	−	−	−
F.spp.2138	2011	F. culmorum	Nottinghamshire	stalk	−	X	−	−	−	−	−	−	−	−
F.spp.2139	2011	F. culmorum	Lincolnshire	stalk	−	X	−	−	−	−	−	−	−	−
F.spp.2140	2011	F. cerealis	Lincolnshire	stalk	−	−	X	−	−	−	−	−	−	−
F.spp.2141	2011	F. culmorum	Lincolnshire	stalk	−	X	−	−	−	−	−	−	−	−
F.spp.2148	2011	F. solani	Nottinghamshire	stalk	−	−	−	−	−	−	−	−	−	−
F.spp.2149	2011	F. culmorum	Somerset	stalk	−	X	−	−	−	−	−	−	−	−
F.spp.2150	2011	F. culmorum	Nottinghamshire	stalk	−	X	−	−	−	−	−	−	−	−
F.spp.2151	2011	F. culmorum	Devon	stalk	−	X	−	−	−	−	−	−	−	−
F.spp.2152	2011	F. avenaceum	Lincolnshire	stalk	X	−	−	−	−	−	−	−	−	−
F.spp.2153	2011	F. culmorum	Herefordshire	stalk	−	X	−	−	−	−	−	−	−	−
F.spp.2156	2011	F. graminearum	Somerset	stalk	−	−	−	−	X	−	−	−	−	−
F.spp.2157	2011	F. culmorum	Nottinghamshire	stalk	−	X	−	−	−	−	−	−	−	−
F.spp.2158	2011	F. culmorum	Nottinghamshire	stalk	−	X	−	−	−	−	−	−	−	−
F.spp.2160	2011	F. culmorum	Nottinghamshire	stalk	−	X	−	−	−	−	−	−	−	−
F.spp.2163	2011	F. culmorum	Lincolnshire	stalk	−	X	−	−	−	−	−	−	−	−
F.spp.2164	2011	F. culmorum	Nottinghamshire	stalk	−	X	−	−	−	−	−	−	−	−
F.spp.2168	2011	F. graminearum	Lincolnshire	stalk	−	−	−	−	X	−	−	−	−	−
F.spp.2169	2011	F. graminearum	Somerset	stalk	−	−	−	−	X	−	−	−	−	−
F.spp.2171	2011	F. graminearum	Devon	stalk	−	−	−	−	X	−	−	−	−	−
F.spp.2174	2011	F. graminearum	Devon	stalk	−	−	−	−	X	−	−	−	−	−
F.spp.2178	2011	F. solani	Lincolnshire	stalk	−	−	−	−	−	−	−	−	−	−
F.spp.2179	2011	F. culmorum	Devon	stalk	−	X	−	−	−	−	−	−	−	−
F.spp.2181	2011	F. culmorum	Nottinghamshire	stalk	−	X	−	−	−	−	−	−	−	−
F.spp.2182	2011	F. avenaceum	Nottinghamshire	stalk	X	−	−	−	−	−	−	−	−	−
F.spp.2183	2011	F. solani	Nottinghamshire	stalk	−	−	−	−	−	−	−	−	−	−
F.spp.2186	2011	F. culmorum	Devon	stalk	−	X	−	−	−	−	−	−	−	−
F.spp.2188	2011	F. graminearum	Nottinghamshire	stalk	−	−	−	−	X	−	−	−	−	−
F.spp.2189	2011	F. culmorum	Lincolnshire	stalk	−	X	−	−	−	−	−	−	−	−
F.spp.2191	2011	F. avenaceum	Nottinghamshire	stalk	X	−	−	−	−	−	−	−	−	−
F.spp.2192	2011	F. culmorum	Lincolnshire	stalk	−	X	−	−	−	−	−	−	−	−
F.spp.2193	2011	F. graminearum	Devon	stalk	−	−	−	−	X	−	−	−	−	−
F.spp.2194	2011	F. solani	Devon	stalk	−	−	−	−	−	−	−	−	−	−
F.spp.2195	2011	F. graminearum	Devon	stalk	−	−	−	−	X	−	−	−	−	−
F.spp.2196	2011	F. avenaceum	Nottinghamshire	stalk	X	−	−	−	−	−	−	−	−	−
F.spp.2197	2011	F. culmorum	Nottinghamshire	stalk	−	X	−	−	−	−	−	−	−	−
F.spp.2198	2011	F. solani	Nottinghamshire	stalk	−	−	−	−	−	−	−	−	−	−
F.spp.2200	2011	F. solani	Lincolnshire	stalk	−	−	−	−	−	−	−	−	−	−
F.spp.2203	2011	F. oxysporum	Herefordshire	stalk	−	−	−	−	−	X	−	−	−	−
F.spp.2204	2011	F. culmorum	Nottinghamshire	stalk	−	X	−	−	−	−	−	−	−	−
F.spp.2205	2011	F. solani	Lincolnshire	stalk	−	−	−	−	−	−	−	−	−	−
F.spp.2206	2011	F. solani	Lincolnshire	stalk	−	−	−	−	−	−	−	−	−	−
F.spp.2207	2011	F. solani	Nottinghamshire	stalk	−	−	−	−	−	−	−	−	−	−
F.spp.2209	2011	F. graminearum	Devon	stalk	−	−	−	−	X	−	−	−	−	−
F.spp.2211	2011	F. graminearum	Lincolnshire	stalk	−	−	−	−	X	−	−	−	−	−
F.spp.2216	2011	F. culmorum	Nottinghamshire	stalk	−	X	−	−	−	−	−	−	−	−
F.spp.2219	2011	F. culmorum	Lincolnshire	stalk	−	X	−	−	−	−	−	−	−	−
F.spp.2222	2011	F. solani	Lincolnshire	stalk	−	−	−	−	−	−	−	−	−	−
F.spp.2224	2011	F. cerealis	Herefordshire	seed	−	−	X	−	−	−	−	−	−	−
F.spp.2225	2011	F. culmorum	Herefordshire	seed	−	X	−	−	−	−	−	−	−	−
F.spp.2227	2011	F. culmorum	Lincolnshire	stalk	−	X	−	−	−	−	−	−	−	−
F.spp.2229	2011	F. solani	Lincolnshire	stalk	−	−	−	−	−	−	−	−	−	−
F.spp.2230	2011	F. culmorum	Lincolnshire	stalk	−	X	−	−	−	−	−	−	−	−
F.spp.2232	2011	F. graminearum	Lincolnshire	stalk	−	−	−	−	X	−	−	−	−	−
F.spp.2234	2011	F. culmorum	Lincolnshire	seed	−	X	−	−	−	−	−	−	−	−
F.spp.2236	2011	F. graminearum	Nottinghamshire	seed	−	−	−	−	X	−	−	−	−	−
F.spp.2237	2011	F. graminearum	Nottinghamshire	seed	−	−	−	−	X	−	−	−	−	−
F.spp.2238	2011	F. graminearum	Nottinghamshire	seed	−	−	−	−	X	−	−	−	−	−
F.spp.2239	2011	F. graminearum	Lincolnshire	seed	−	−	−	−	X	−	−	−	−	−
F.spp.2240	2011	F. culmorum	Nottinghamshire	seed	−	X	−	−	−	−	−	−	−	−
F.spp.2242	2011	F. culmorum	Nottinghamshire	seed	−	X	−	−	−	−	−	−	−	−
F.spp.2243	2011	F. solani	Herefordshire	seed	−	−	−	−	−	−	−	−	−	−
F.spp.2244	2011	F. culmorum	Herefordshire	seed	−	X	−	−	−	−	−	−	−	−
F.spp.2245	2011	F. tricinctum	Herefordshire	seed	−	−	−	−	−	−	−	−	−	−
F.spp.2246	2011	F. solani	Nottinghamshire	stalk	−	−	−	−	−	−	−	−	−	−
F.spp.2247	2011	F. solani	Lincolnshire	stalk	−	−	−	−	−	−	−	−	−	−
F.spp.2248	2011	F. solani	Lincolnshire	stalk	−	−	−	−	−	−	−	−	−	−
F.spp.2251	2011	F. culmorum	Lincolnshire	stalk	−	X	−	−	−	−	−	−	−	−
F.spp.2253	2011	F. culmorum	Herefordshire	stalk	−	X	−	−	−	−	−	−	−	−
F.spp.2254	2011	F. solani	Somerset	stalk	−	−	−	−	−	−	−	−	−	−
F.spp.2256	2011	F. tricinctum	Somerset	stalk	−	−	−	−	−	−	−	−	−	−
F.spp.2257	2011	F. culmorum	Nottinghamshire	seed	−	X	−	−	−	−	−	−	−	−
F.spp.2258	2011	F. cerealis	Nottinghamshire	seed	−	−	X	−	−	−	−	−	−	−
F.spp.2259	2011	F. culmorum	Nottinghamshire	seed	−	X	−	−	−	−	−	−	−	−
F.spp.2260	2011	F. solani	Nottinghamshire	seed	−	−	−	−	−	−	−	−	−	−
F.spp.2265	2011	F. culmorum	Nottinghamshire	seed	−	X	−	−	−	−	−	−	−	−
F.spp.2266	2011	F. culmorum	Nottinghamshire	seed	−	X	−	−	−	−	−	−	−	−
F.spp.2267	2011	F. graminearum	Nottinghamshire	seed	−	−	−	−	X	−	−	−	−	−
F.spp.2268	2011	F. graminearum	Nottinghamshire	seed	−	−	−	−	X	−	−	−	−	−
F.spp.2269	2011	F. graminearum	Nottinghamshire	seed	−	−	−	−	X	−	−	−	−	−
F.spp.2270	2011	F. culmorum	Nottinghamshire	seed	−	X	−	−	−	−	−	−	−	−
F.spp.2272	2011	F. oxysporum	Herefordshire	seed	−	−	−	−	−	X	−	−	−	−
F.spp.2273	2011	F. graminearum	Nottinghamshire	seed	−	−	−	−	X	−	−	−	−	−
F.spp.2274	2011	F. graminearum	Lincolnshire	seed	−	−	−	−	X	−	−	−	−	−
F.spp.2275	2011	F. graminearum	Lincolnshire	seed	−	−	−	−	X	−	−	−	−	−
F.spp.2276	2011	F. culmorum	Nottinghamshire	seed	−	X	−	−	−	−	−	−	−	−
F.spp.2277	2011	F. culmorum	Nottinghamshire	seed	−	X	−	−	−	−	−	−	−	−
F.spp.2278	2011	F. culmorum	Nottinghamshire	seed	−	X	−	−	−	−	−	−	−	−
F.spp.2279	2011	F. graminearum	Nottinghamshire	seed	−	−	−	−	X	−	−	−	−	−
F.spp.2280	2011	F. solani	Sussex	seed	−	−	−	−	−	−	−	−	−	−
F.spp.2281	2011	F. tricinctum	Sussex	seed	−	−	−	−	−	−	−	−	−	−
F.spp.2282	2011	F. graminearum	Sussex	seed	−	−	−	−	X	−	−	−	−	−
F.spp.2283	2011	F. graminearum	Sussex	seed	−	−	−	−	X	−	−	−	−	−
F.spp.2284	2011	F. graminearum	Lincolnshire	seed	−	−	−	−	X	−	−	−	−	−
F.spp.2286	2011	F. graminearum	Lincolnshire	seed	−	−	−	−	X	−	−	−	−	−
F.spp.2287	2011	F. solani	Nottinghamshire	seed	−	−	−	−	−	−	−	−	−	−
F.spp.2288	2011	F. culmorum	Herefordshire	seed	−	X	−	−	−	−	−	−	−	−
F.spp.2289	2011	F. culmorum	Herefordshire	seed	−	X	−	−	−	−	−	−	−	−
F.spp.2290	2011	F. culmorum	Lincolnshire	seed	−	X	−	−	−	−	−	−	−	−
F.spp.2291	2011	F. culmorum	Lincolnshire	seed	−	X	−	−	−	−	−	−	−	−
F.spp.2294	2011	F. solani	Lincolnshire	seed	−	−	−	−	−	−	−	−	−	−
F.spp.2297	2011	F. culmorum	Lincolnshire	seed	−	X	−	−	−	−	−	−	−	−
F.spp.2298	2011	F. graminearum	Sussex	seed	−	−	−	−	X	−	−	−	−	−
F.spp.2299	2011	F. oxysporum	Nottinghamshire	seed	−	−	−	−	−	X	−	−	−	−
F.spp.2300	2011	F. graminearum	Nottinghamshire	seed	−	−	−	−	X	−	−	−	−	−
F.spp.2303	2011	F. graminearum	Lincolnshire	seed	−	−	−	−	X	−	−	−	−	−
F.spp.2304	2011	F. graminearum	Nottinghamshire	seed	−	−	−	−	X	−	−	−	−	−
F.spp.2305	2011	F. graminearum	Nottinghamshire	seed	−	−	−	−	X	−	−	−	−	−
F.spp.2306	2011	F. culmorum	Sussex	seed	−	X	−	−	−	−	−	−	−	−
F.spp.2307	2011	F. culmorum	Devon	seed	−	X	−	−	−	−	−	−	−	−
F.spp.2310	2011	F. solani	Nottinghamshire	seed	−	−	−	−	−	−	−	−	−	−
F.spp.2311	2011	F. graminearum	Nottinghamshire	seed	−	−	−	−	X	−	−	−	−	−
F.spp.2312	2011	F. solani	Lincolnshire	seed	−	−	−	−	−	−	−	−	−	−
F.spp.2313	2011	F. solani	Lincolnshire	seed	−	−	−	−	−	−	−	−	−	−
F.spp.2314	2011	F. culmorum	Sussex	seed	−	X	−	−	−	−	−	−	−	−
F.spp.2315	2011	F. graminearum	Lincolnshire	seed	−	−	−	−	X	−	−	−	−	−
F.spp.2318	2011	F. graminearum	Sussex	seed	−	−	−	−	X	−	−	−	−	−
F.spp.2319	2011	F. oxysporum	Herefordshire	seed	−	−	−	−	−	X	−	−	−	−
F.spp.2321	2011	F. culmorum	Herefordshire	seed	−	X	−	−	−	−	−	−	−	−
F.spp.2323	2011	F. culmorum	Lincolnshire	seed	−	X	−	−	−	−	−	−	−	−
F.spp.2326	2011	F. culmorum	Sussex	seed	−	X	−	−	−	−	−	−	−	−
F.spp.2327	2011	F. graminearum	Sussex	seed	−	−	−	−	X	−	−	−	−	−
F.spp.2328	2011	F. graminearum	Sussex	seed	−	−	−	−	X	−	−	−	−	−
F.spp.2330	2011	F. culmorum	Nottinghamshire	seed	−	X	−	−	−	−	−	−	−	−
F.spp.2331	2011	F. graminearum	Nottinghamshire	seed	−	−	−	−	X	−	−	−	−	−
F.spp.2333	2011	F. graminearum	Nottinghamshire	seed	−	−	−	−	X	−	−	−	−	−
F.spp.2336	2011	F. culmorum	Sussex	seed	−	X	−	−	−	−	−	−	−	−
F.spp.2337	2011	F. graminearum	Sussex	seed	−	−	−	−	X	−	−	−	−	−
F.spp.2338	2011	F. culmorum	Sussex	seed	−	X	−	−	−	−	−	−	−	−
F.spp.2339	2011	F. graminearum	Sussex	seed	−	−	−	−	X	−	−	−	−	−
F.spp.2340	2011	F. culmorum	Devon	seed	−	X	−	−	−	−	−	−	−	−
F.spp.2342	2011	F. culmorum	Lincolnshire	seed	−	X	−	−	−	−	−	−	−	−
F.spp.2344	2011	F. avenaceum	Lincolnshire	seed	X	−	−	−	−	−	−	−	−	−
F.spp.2345	2011	F. culmorum	Herefordshire	seed	−	X	−	−	−	−	−	−	−	−
F.spp.2351	2011	F. graminearum	Lincolnshire	seed	−	−	−	−	X	−	−	−	−	−
F.spp.2352	2011	F. culmorum	Lincolnshire	seed	−	X	−	−	−	−	−	−	−	−
F.spp.2354	2011	F. graminearum	Lincolnshire	seed	−	−	−	−	X	−	−	−	−	−
F.spp.2355	2011	F. graminearum	Lincolnshire	seed	−	−	−	−	X	−	−	−	−	−
F.spp.2357	2011	F. graminearum	Lincolnshire	seed	−	−	−	−	X	−	−	−	−	−
F.spp.2358	2011	F. culmorum	Lincolnshire	seed	−	X	−	−	−	−	−	−	−	−
F.spp.2359	2011	F. graminearum	Lincolnshire	seed	−	−	−	−	X	−	−	−	−	−
F.spp.2360	2011	F. graminearum	Lincolnshire	seed	−	−	−	−	X	−	−	−	−	−
F.spp.2362	2011	F. graminearum	Devon	seed	−	−	−	−	X	−	−	−	−	−
F.spp.2363	2011	F. graminearum	Devon	seed	−	−	−	−	X	−	−	−	−	−
F.spp.2364	2011	F. culmorum	Devon	seed	−	X	−	−	−	−	−	−	−	−
F.spp.2366	2011	F. culmorum	Shropshire	seed	−	X	−	−	−	−	−	−	−	−
F.spp.2367	2011	F. graminearum	Sussex	seed	−	−	−	−	X	−	−	−	−	−
F.spp.2368	2011	F. graminearum	Sussex	seed	−	−	−	−	X	−	−	−	−	−
F.spp.2369	2011	F. graminearum	Sussex	seed	−	−	−	−	X	−	−	−	−	−
F.spp.2371	2011	F. culmorum	Herefordshire	seed	−	X	−	−	−	−	−	−	−	−
F.spp.2376	2011	F. culmorum	Herefordshire	seed	−	X	−	−	−	−	−	−	−	−
F.spp.2377	2011	F. culmorum	Nottinghamshire	seed	−	X	−	−	−	−	−	−	−	−
F.spp.2378	2011	F. culmorum	Nottinghamshire	seed	−	X	−	−	−	−	−	−	−	−
F.spp.2382	2011	F. culmorum	Herefordshire	seed	−	X	−	−	−	−	−	−	−	−
F.spp.2384	2011	F. culmorum	Shropshire	seed	−	X	−	−	−	−	−	−	−	−
F.spp.2385	2011	F. culmorum	Shropshire	seed	−	X	−	−	−	−	−	−	−	−
F.spp.2386	2011	F. graminearum	Devon	seed	−	−	−	−	X	−	−	−	−	−
F.spp.2387	2011	F. culmorum	Nottinghamshire	seed	−	X	−	−	−	−	−	−	−	−
F.spp.2388	2011	F. solani	Nottinghamshire	seed	−	−	−	−	−	−	−	−	−	−
F.spp.2390	2011	F. graminearum	herefordshire	seed	−	−	−	−	X	−	−	−	−	−
F.spp.2392	2011	F. culmorum	Devon	seed	−	X	−	−	−	−	−	−	−	−
F.spp.2393	2011	F. culmorum	Devon	seed	−	X	−	−	−	−	−	−	−	−
F.spp.2394	2011	F. culmorum	Devon	seed	−	X	−	−	−	−	−	−	−	−
F.spp.2396	2011	F. culmorum	Devon	seed	−	X	−	−	−	−	−	−	−	−
F.spp.2397	2011	F. graminearum	Sussex	seed	−	−	−	−	X	−	−	−	−	−
F.spp.2398	2011	F. cerealis	Lincolnshire	seed	−	−	X	−	−	−	−	−	−	−
F.spp.2400	2011	F. culmorum	Herefordshire	seed	−	X	−	−	−	−	−	−	−	−
F.spp.2401	2011	F. cerealis	Herefordshire	seed	−	−	X	−	−	−	−	−	−	−
F.spp.2403	2011	F. culmorum	Nottinghamshire	seed	−	X	−	−	−	−	−	−	−	−
F.spp.2404	2011	F. culmorum	Nottinghamshire	seed	−	X	−	−	−	−	−	−	−	−
F.spp.2405	2011	F. avenaceum	Nottinghamshire	seed	X	−	−	−	−	−	−	−	−	−
F.spp.2407	2011	F. graminearum	Nottinghamshire	seed	−	−	−	−	X	−	−	−	−	−
F.spp.2408	2011	F. graminearum	Nottinghamshire	seed	−	−	−	−	X	−	−	−	−	−
F.spp.2409	2011	F. graminearum	Nottinghamshire	seed	−	−	−	−	X	−	−	−	−	−
F.spp.2411	2011	F. graminearum	Sussex	seed	−	−	−	−	X	−	−	−	−	−
F.spp.2413	2011	F. tricinctum	Lincolnshire	seed	−	−	−	−	−	−	−	−	−	−
F.spp.2414	2011	F. graminearum	Nottinghamshire	seed	−	−	−	−	X	−	−	−	−	−
F.spp.2415	2011	F. culmorum	Nottinghamshire	seed	−	X	−	−	−	−	−	−	−	−
F.spp.2419	2011	F. graminearum	Lincolnshire	seed	−	−	−	−	X	−	−	−	−	−
F.spp.2420	2011	F. graminearum	Devon	seed	−	−	−	−	X	−	−	−	−	−
F.spp.2421	2011	F. graminearum	Devon	seed	−	−	−	−	X	−	−	−	−	−
F.spp.2423	2011	F. culmorum	Shropshire	seed	−	X	−	−	−	−	−	−	−	−
F.spp.2424	2011	F. culmorum	Shropshire	seed	−	X	−	−	−	−	−	−	−	−
F.spp.2427	2011	F. culmorum	Shropshire	seed	−	X	−	−	−	−	−	−	−	−
F.spp.2428	2011	F. cerealis	Shropshire	seed	−	−	X	−	−	−	−	−	−	−
F.spp.2429	2011	F. culmorum	Devon	seed	−	X	−	−	−	−	−	−	−	−
F.spp.2432	2011	F. culmorum	Shropshire	seed	−	X	−	−	−	−	−	−	−	−
F.spp.2433	2011	F. culmorum	Shropshire	seed	−	X	−	−	−	−	−	−	−	−
F.spp.2434	2011	F. graminearum	Lincolnshire	seed	−	−	−	−	X	−	−	−	−	−
F.spp.2435	2011	F. graminearum	Lincolnshire	seed	−	−	−	−	X	−	−	−	−	−
F.spp.2437	2011	F. graminearum	Lincolnshire	seed	−	−	−	−	X	−	−	−	−	−
F.spp.2438	2011	F. graminearum	Lincolnshire	seed	−	−	−	−	X	−	−	−	−	−
F.spp.2439	2011	F. graminearum	Nottinghamshire	seed	−	−	−	−	X	−	−	−	−	−
F.spp.2440	2011	F. culmorum	Nottinghamshire	seed	−	X	−	−	−	−	−	−	−	−
F.spp.2441	2011	F. graminearum	Nottinghamshire	seed	−	−	−	−	X	−	−	−	−	−
F.spp.2444	2011	F. culmorum	Devon	seed	−	X	−	−	−	−	−	−	−	−
F.spp.2445	2011	F. culmorum	Nottinghamshire	seed	−	X	−	−	−	−	−	−	−	−
F.spp.2448	2011	F. solani	Nottinghamshire	seed	−	−	−	−	−	−	−	−	−	−
F.spp.2449	2011	F. solani	Nottinghamshire	seed	−	−	−	−	−	−	−	−	−	−
F.spp.2450	2011	F. culmorum	Nottinghamshire	seed	−	X	−	−	−	−	−	−	−	−
F.spp.2451	2011	F. poae	Nottinghamshire	seed	−	−	−	−	−	−	X	−	−	−
F.spp.2452	2011	F. graminearum	Devon	seed	−	−	−	−	X	−	−	−	−	−
F.spp.2453	2011	F. culmorum	Devon	seed	−	X	−	−	−	−	−	−	−	−
F.spp.2454	2011	F. avenaceum	Shropshire	seed	X	−	−	−	−	−	−	−	−	−
F.spp.2455	2011	F. culmorum	Devon	seed	−	X	−	−	−	−	−	−	−	−
F.spp.2456	2011	F. culmorum	Devon	seed	−	X	−	−	−	−	−	−	−	−
F.spp.2457	2011	F. subglutinans	Shropshire	seed	−	−	−	−	−	−	−	−	X	−
F.spp.2458	2011	F. graminearum	Devon	seed	−	−	−	−	X	−	−	−	−	−
F.spp.2459	2011	F. poae	Nottinghamshire	seed	−	−	−	−	−	−	X	−	−	−
F.spp.2460	2011	F. culmorum	Nottinghamshire	seed	−	X	−	−	−	−	−	−	−	−
F.spp.2461	2011	F. poae	Nottinghamshire	seed	−	−	−	−	−	−	X	−	−	−
F.spp.2462	2011	F. culmorum	Lincolnshire	seed	−	X	−	−	−	−	−	−	−	−
F.spp.2464	2011	F. graminearum	Lincolnshire	seed	−	−	−	−	X	−	−	−	−	−
F.spp.2465	2011	F. avenaceum	Lincolnshire	seed	X	−	−	−	−	−	−	−	−	−
F.spp.2466	2011	F. culmorum	Nottinghamshire	seed	−	X	−	−	−	−	−	−	−	−
F.spp.2467	2011	F. graminearum	Lincolnshire	seed	−	−	−	−	X	−	−	−	−	−
F.spp.2468	2011	F. graminearum	Lincolnshire	seed	−	−	−	−	X	−	−	−	−	−
F.spp.2469	2011	F. graminearum	Lincolnshire	seed	−	−	−	−	X	−	−	−	−	−
F.spp.2471	2011	F. culmorum	Devon	seed	−	X	−	−	−	−	−	−	−	−
F.spp.2472	2011	F. graminearum	Devon	seed	−	−	−	−	X	−	−	−	−	−
F.spp.2473	2011	F. culmorum	Devon	seed	−	X	−	−	−	−	−	−	−	−
F.spp.2474	2011	F. graminearum	Sussex	seed	−	−	−	−	X	−	−	−	−	−
F.spp.2475	2011	F. graminearum	Devon	seed	−	−	−	−	X	−	−	−	−	−
F.spp.2476	2011	F. graminearum	Sussex	seed	−	−	−	−	X	−	−	−	−	−
F.spp.2477	2011	F. graminearum	Sussex	seed	−	−	−	−	X	−	−	−	−	−
F.spp.2478	2011	F. culmorum	Devon	seed	−	X	−	−	−	−	−	−	−	−
F.spp.2479	2011	F. graminearum	Devon	seed	−	−	−	−	X	−	−	−	−	−
F.spp.2480	2011	F. culmorum	Devon	seed	−	X	−	−	−	−	−	−	−	−
F.spp.2481	2011	F. culmorum	Lincolnshire	seed	−	X	−	−	−	−	−	−	−	−
F.spp.2482	2011	F. culmorum	Nottinghamshire	seed	−	X	−	−	−	−	−	−	−	−
F.spp.2483	2011	F. graminearum	Devon	seed	−	−	−	−	X	−	−	−	−	−
F.spp.2484	2011	F. culmorum	Devon	seed	−	X	−	−	−	−	−	−	−	−
F.spp.2485	2011	F. graminearum	Devon	seed	−	−	−	−	X	−	−	−	−	−
F.spp.2486	2011	F. culmorum	Herefordshire	seed	−	X	−	−	−	−	−	−	−	−
F.spp.2487	2011	F. culmorum	Herefordshire	seed	−	X	−	−	−	−	−	−	−	−
F.spp.2489	2011	F. culmorum	Nottinghamshire	seed	−	X	−	−	−	−	−	−	−	−
F.spp.2490	2011	F. graminearum	Lincolnshire	seed	−	−	−	−	X	−	−	−	−	−
F.spp.2492	2011	F. culmorum	Devon	seed	−	X	−	−	−	−	−	−	−	−
F.spp.2493	2011	F. culmorum	Shropshire	seed	−	X	−	−	−	−	−	−	−	−
F.spp.2494	2011	F. culmorum	Devon	seed	−	X	−	−	−	−	−	−	−	−
F.spp.2495	2011	F. graminearum	Devon	seed	−	−	−	−	X	−	−	−	−	−
F.spp.2496	2011	F. graminearum	Devon	seed	−	−	−	−	X	−	−	−	−	−
F.spp.2497	2011	F. culmorum	Devon	seed	−	X	−	−	−	−	−	−	−	−
F.spp.2499	2011	F. culmorum	Shropshire	seed	−	X	−	−	−	−	−	−	−	−
F.spp.2500	2011	F. culmorum	Devon	seed	−	X	−	−	−	−	−	−	−	−
F.spp.2502	2011	F. solani	Lincolnshire	seed	−	−	−	−	−	−	−	−	−	−
F.spp.2504	2011	F. oxysporum	Herefordshire	seed	−	−	−	−	−	X	−	−	−	−
F.spp.2505	2011	F. culmorum	Sussex	seed	−	X	−	−	−	−	−	−	−	−
F.spp.2506	2011	F. culmorum	Sussex	seed	−	X	−	−	−	−	−	−	−	−
F.spp.2507	2011	F. graminearum	Shropshire	seed	−	−	−	−	X	−	−	−	−	−
F.spp.2653	2011	F. graminearum	Yorkshire	stalk	−	−	−	−	X	−	−	−	−	−
F.spp.2660	2011	F. culmorum	Shropshire	stalk	−	X	−	−	−	−	−	−	−	−
F.spp.2675	2011	F. culmorum	Yorkshire	stalk	−	X	−	−	−	−	−	−	−	−
F.spp.2688	2011	F. graminearum	Gloucestershire	stalk	−	−	−	−	X	−	−	−	−	−
F.spp.2804	2011	F. culmorum	Herefordshire	seed	−	X	−	−	−	−	−	−	−	−
F.spp.2822	2011	F. culmorum	Devon	stalk	−	X	−	−	−	−	−	−	−	−
F.spp.2839	2011	F. culmorum	Sussex	stalk	−	X	−	−	−	−	−	−	−	−
F.spp.2845	2011	F. culmorum	Sussex	stalk	−	X	−	−	−	−	−	−	−	−
F.spp.2895	2011	F. culmorum	Oxfordshire	stalk	−	X	−	−	−	−	−	−	−	−
F.spp.2907	2011	F. graminearum	Sussex	stalk	−	−	−	−	X	−	−	−	−	−
F.spp.2908	2011	F. culmorum	Sussex	stalk	−	X	−	−	−	−	−	−	−	−
F.spp.2911	2011	F. culmorum	Shropshire	stalk	−	X	−	−	−	−	−	−	−	−
F.spp.2945	2011	F. graminearum	Sussex	seed	−	−	−	−	X	−	−	−	−	−
F.spp.2963	2011	F. culmorum	Nottinghamshire	stalk	−	X	−	−	−	−	−	−	−	−
F.spp.2971	2011	F. culmorum	Nottinghamshire	stalk	−	X	−	−	−	−	−	−	−	−
F.spp.2975	2011	F. culmorum	Nottinghamshire	stalk	−	X	−	−	−	−	−	−	−	−
F.spp.3001	2011	F. graminearum	Nottinghamshire	seed	−	−	−	−	X	−	−	−	−	−
F.spp.3002	2011	F. culmorum	Nottinghamshire	seed	−	X	−	−	−	−	−	−	−	−
F.spp.3003	2011	F. graminearum	Nottinghamshire	seed	−	−	−	−	X	−	−	−	−	−
F.spp.3005	2011	F. solani	Nottinghamshire	seed	−	−	−	−	−	−	−	−	−	−
F.spp.3009	2011	F. poae	Nottinghamshire	seed	−	−	−	−	−	−	X	−	−	−
F.spp.3010	2011	F. graminearum	Nottinghamshire	seed	−	−	−	−	X	−	−	−	−	−
F.spp.3011	2011	F. graminearum	Nottinghamshire	seed	−	−	−	−	X	−	−	−	−	−
F.spp.3012	2011	F. graminearum	Nottinghamshire	seed	−	−	−	−	X	−	−	−	−	−
F.spp.3013	2011	F. graminearum	Nottinghamshire	seed	−	−	−	−	X	−	−	−	−	−
F.spp.3014	2011	F. graminearum	Nottinghamshire	seed	−	−	−	−	X	−	−	−	−	−
F.spp.3015	2011	F. graminearum	Nottinghamshire	seed	−	−	−	−	X	−	−	−	−	−
F.spp.3016	2011	F. avenaceum	Nottinghamshire	seed	X	−	−	−	−	−	−	−	−	−
F.spp.3017	2011	F. graminearum	Somerset	seed	−	−	−	−	X	−	−	−	−	−
F.spp.3021	2011	F. culmorum	Somerset	seed	−	X	−	−	−	−	−	−	−	−
F.spp.3022	2011	F. culmorum	Somerset	seed	−	X	−	−	−	−	−	−	−	−
F.spp.3025	2011	F. culmorum	Somerset	seed	−	X	−	−	−	−	−	−	−	−
F.spp.3026	2011	F. culmorum	Nottinghamshire	stalk	−	X	−	−	−	−	−	−	−	−
F.spp.3028	2011	F. culmorum	Somerset	seed	−	X	−	−	−	−	−	−	−	−
F.spp.3029	2011	F. graminearum	Lincolnshire	seed	−	−	−	−	X	−	−	−	−	−
F.spp.3033	2011	F. avenaceum	Somerset	seed	X	−	−	−	−	−	−	−	−	−
F.spp.3034	2011	F. culmorum	Herefordshire	seed	−	X	−	−	−	−	−	−	−	−
F.spp.3035	2011	F. culmorum	Somerset	seed	−	X	−	−	−	−	−	−	−	−
F.spp.3037	2011	F. graminearum	Devon	seed	−	−	−	−	X	−	−	−	−	−
F.spp.3038	2011	F. graminearum	Devon	seed	−	−	−	−	X	−	−	−	−	−
F.spp.3039	2011	F. graminearum	Lincolnshire	seed	−	−	−	−	X	−	−	−	−	−
F.spp.3040	2011	F. graminearum	Lincolnshire	seed	−	−	−	−	X	−	−	−	−	−
F.spp.3041	2011	F. culmorum	Lincolnshire	seed	−	X	−	−	−	−	−	−	−	−
F.spp.3042	2011	F. graminearum	Lincolnshire	seed	−	−	−	−	X	−	−	−	−	−
F.spp.3043	2011	F. avenaceum	Lincolnshire	seed	X	−	−	−	−	−	−	−	−	−
F.spp.3044	2011	F. graminearum	Nottinghamshire	seed	−	−	−	−	X	−	−	−	−	−
F.spp.3045	2011	F. graminearum	Nottinghamshire	seed	−	−	−	−	X	−	−	−	−	−
F.spp.3046	2011	F. solani	Nottinghamshire	seed	−	−	−	−	−	−	−	−	−	−
F.spp.3048	2011	F. culmorum	Devon	seed	−	X	−	−	−	−	−	−	−	−
F.spp.3049	2011	F. culmorum	Devon	seed	−	X	−	−	−	−	−	−	−	−
F.spp.3051	2011	F. avenaceum	Devon	seed	X	−	−	−	−	−	−	−	−	−
F.spp.3052	2011	F. avenaceum	Devon	seed	X	−	−	−	−	−	−	−	−	−
F.spp.3054	2011	F. culmorum	Devon	seed	−	X	−	−	−	−	−	−	−	−
F.spp.3055	2011	F. culmorum	Herefordshire	seed	−	X	−	−	−	−	−	−	−	−
F.spp.3056	2011	F. culmorum	Herefordshire	seed	−	X	−	−	−	−	−	−	−	−
F.spp.3060	2011	F. graminearum	Lincolnshire	seed	−	−	−	−	X	−	−	−	−	−
F.spp.3062	2011	F. culmorum	Shropshire	seed	−	X	−	−	−	−	−	−	−	−
F.spp.3063	2011	F. graminearum	Somerset	seed	−	−	−	−	X	−	−	−	−	−
F.spp.3064	2011	F. graminearum	Lincolnshire	seed	−	−	−	−	X	−	−	−	−	−
F.spp.3065	2011	F. avenaceum	Lincolnshire	seed	X	−	−	−	−	−	−	−	−	−
F.spp.3066	2011	F. culmorum	Nottinghamshire	seed	−	X	−	−	−	−	−	−	−	−
F.spp.3067	2011	F. culmorum	Somerset	seed	−	X	−	−	−	−	−	−	−	−
F.spp.3068	2011	F. graminearum	Devon	seed	−	−	−	−	X	−	−	−	−	−
F.spp.3070	2011	F. graminearum	Somerset	seed	−	−	−	−	X	−	−	−	−	−
F.spp.3071	2011	F. culmorum	Devon	seed	−	X	−	−	−	−	−	−	−	−
F.spp.3072	2011	F. culmorum	Nottinghamshire	seed	−	X	−	−	−	−	−	−	−	−
F.spp.3073	2011	F. culmorum	Nottinghamshire	seed	−	X	−	−	−	−	−	−	−	−
F.spp.3074	2011	F. culmorum	Devon	seed	−	X	−	−	−	−	−	−	−	−
F.spp.3075	2011	F. graminearum	Devon	seed	−	−	−	−	X	−	−	−	−	−
F.spp.3078	2011	F. graminearum	Devon	seed	−	−	−	−	X	−	−	−	−	−
F.spp.3079	2011	F. avenaceum	Nottinghamshire	seed	X	−	−	−	−	−	−	−	−	−
F.spp.3080	2011	F. avenaceum	Nottinghamshire	seed	X	−	−	−	−	−	−	−	−	−
F.spp.3081	2011	F. culmorum	Lincolnshire	seed	−	X	−	−	−	−	−	−	−	−
F.spp.3082	2011	F. culmorum	Lincolnshire	seed	−	X	−	−	−	−	−	−	−	−
F.spp.3084	2011	F. graminearum	Devon	seed	−	−	−	−	X	−	−	−	−	−
F.spp.3085	2011	F. solani	Devon	seed	−	−	−	−	−	−	−	−	−	−
F.spp.3087	2011	F. graminearum	Nottinghamshire	seed	−	−	−	−	X	−	−	−	−	−
F.spp.3088	2011	F. culmorum	Nottinghamshire	seed	−	X	−	−	−	−	−	−	−	−
F.spp.3089	2011	F. culmorum	Nottinghamshire	seed	−	X	−	−	−	−	−	−	−	−
F.spp.3090	2011	F. graminearum	Nottinghamshire	seed	−	−	−	−	X	−	−	−	−	−
F.spp.3091	2011	F. culmorum	Nottinghamshire	seed	−	X	−	−	−	−	−	−	−	−
F.spp.3095	2011	F. culmorum	Devon	seed	−	X	−	−	−	−	−	−	−	−
F.spp.3096	2011	F. poae	Lincolnshire	seed	−	−	−	−	−	−	X	−	−	−
F.spp.3097	2011	F. poae	Lincolnshire	seed	−	−	−	−	−	−	X	−	−	−
F.spp.3098	2011	F. culmorum	Devon	seed	−	X	−	−	−	−	−	−	−	−
F.spp.3100	2011	F. graminearum	Devon	seed	−	−	−	−	X	−	−	−	−	−
F.spp.3101	2011	F. graminearum	Devon	seed	−	−	−	−	X	−	−	−	−	−
F.spp.3102	2011	F. solani	Devon	seed	−	−	−	−	−	−	−	−	−	−
F.spp.3103	2011	F. solani	Somerset	seed	−	−	−	−	−	−	−	−	−	−
F.spp.3104	2011	F. culmorum	Devon	seed	−	X	−	−	−	−	−	−	−	−
F.spp.3105	2011	F. culmorum	Devon	seed	−	X	−	−	−	−	−	−	−	−
F.spp.3106	2011	F. solani	Somerset	seed	−	−	−	−	−	−	−	−	−	−
F.spp.3107	2011	F. culmorum	Herefordshire	seed	−	X	−	−	−	−	−	−	−	−
F.spp.3108	2011	F. culmorum	Herefordshire	seed	−	X	−	−	−	−	−	−	−	−
F.spp.3109	2011	F. culmorum	Herefordshire	seed	−	X	−	−	−	−	−	−	−	−
F.spp.3110	2011	F. avenaceum	Lincolnshire	seed	X	−	−	−	−	−	−	−	−	−
F.spp.3111	2011	F. napiforme	Lincolnshire	seed	−	−	−	−	−	−	−	−	−	−
F.spp.3112	2011	F. napiforme	Lincolnshire	seed	−	−	−	−	−	−	−	−	−	−
F.spp.3113	2011	F. graminearum	Nottinghamshire	seed	−	−	−	−	X	−	−	−	−	−
F.spp.3116	2011	F. verticillioides	Lincolnshire	seed	−	−	−	−	−	−	−	−	−	X
F.spp.3118	2011	F. graminearum	Nottinghamshire	seed	−	−	−	−	X	−	−	−	−	−
F.spp.3119	2011	F. poae	Herefordshire	seed	−	−	−	−	−	−	X	−	−	−
F.spp.3120	2011	F. poae	Herefordshire	seed	−	−	−	−	−	−	X	−	−	−
F.spp.3121	2011	F. napiforme	Herefordshire	seed	−	−	−	−	−	−	−	−	−	−
F.spp.3124	2011	F. solani	Nottinghamshire	seed	−	−	−	−	−	−	−	−	−	−
F.spp.3125	2011	F. culmorum	Nottinghamshire	seed	−	X	−	−	−	−	−	−	−	−
F.spp.3126	2011	F. culmorum	Nottinghamshire	seed	−	X	−	−	−	−	−	−	−	−
F.spp.3127	2011	F. culmorum	Nottinghamshire	seed	−	X	−	−	−	−	−	−	−	−
F.spp.3128	2011	F. culmorum	Nottinghamshire	seed	−	X	−	−	−	−	−	−	−	−
F.spp.3129	2011	F. graminearum	Nottinghamshire	seed	−	−	−	−	X	−	−	−	−	−
F.spp.3130	2011	F. graminearum	Nottinghamshire	seed	−	−	−	−	X	−	−	−	−	−
F.spp.3131	2011	F. solani	Nottinghamshire	seed	−	−	−	−	−	−	−	−	−	−
F.spp.3132	2011	F. solani	Nottinghamshire	seed	−	−	−	−	−	−	−	−	−	−
F.spp.3133	2011	F. culmorum	Nottinghamshire	seed	−	X	−	−	−	−	−	−	−	−
F.spp.3134	2011	F. culmorum	Nottinghamshire	seed	−	X	−	−	−	−	−	−	−	−
F.spp.3135	2011	F. graminearum	Nottinghamshire	seed	−	−	−	−	X	−	−	−	−	−
F.spp.3136	2011	F. graminearum	Lincolnshire	seed	−	−	−	−	X	−	−	−	−	−
F.spp.3137	2011	F. graminearum	Nottinghamshire	seed	−	−	−	−	X	−	−	−	−	−
F.spp.3138	2011	F. graminearum	Nottinghamshire	seed	−	−	−	−	X	−	−	−	−	−
F.spp.3139	2011	F. graminearum	Nottinghamshire	seed	−	−	−	−	X	−	−	−	−	−
F.spp.3140	2011	F. graminearum	Nottinghamshire	seed	−	−	−	−	X	−	−	−	−	−
F.spp.3141	2011	F. culmorum	Nottinghamshire	seed	−	X	−	−	−	−	−	−	−	−
F.spp.3142	2011	F. graminearum	Nottinghamshire	seed	−	−	−	−	X	−	−	−	−	−
F.spp.3143	2011	F. graminearum	Nottinghamshire	seed	−	−	−	−	X	−	−	−	−	−
F.spp.3144	2011	F. graminearum	Nottinghamshire	seed	−	−	−	−	X	−	−	−	−	−
F.spp.3148	2011	F. graminearum	Lincolnshire	seed	−	−	−	−	X	−	−	−	−	−
F.spp.3149	2011	F. graminearum	Nottinghamshire	seed	−	−	−	−	X	−	−	−	−	−
F.spp.3150	2011	F. avenaceum	Nottinghamshire	seed	X	−	−	−	−	−	−	−	−	−
F.spp.3151	2011	F. avenaceum	Nottinghamshire	seed	X	−	−	−	−	−	−	−	−	−
F.spp.3152	2011	F. culmorum	Nottinghamshire	seed	−	X	−	−	−	−	−	−	−	−
F.spp.3153	2011	F. graminearum	Nottinghamshire	seed	−	−	−	−	X	−	−	−	−	−
F.spp.3154	2011	F. solani	Nottinghamshire	seed	−	−	−	−	−	−	−	−	−	−
F.spp.3155	2011	F. poae	Nottinghamshire	seed	−	−	−	−	−	−	X	−	−	−
F.spp.3156	2011	F. graminearum	Nottinghamshire	seed	−	−	−	−	X	−	−	−	−	−
F.spp.3157	2011	F. solani	Nottinghamshire	seed	−	−	−	−	−	−	−	−	−	−
F.spp.3175	2011	F. equiseti	Sussex	stalk	−	−	−	X	−	−	−	−	−	−
F.spp.3176	2011	F. culmorum	Gloucestershire	stalk	−	X	−	−	−	−	−	−	−	−
F.spp.3180	2011	F. culmorum	Gloucestershire	seed	−	X	−	−	−	−	−	−	−	−
F.spp.3186	2011	F. culmorum	Gloucestershire	seed	−	X	−	−	−	−	−	−	−	−
F.spp.401	2011	F. graminearum	Sussex	stalk	−	−	−	−	X	−	−	−	−	−
F.spp.402	2011	F. graminearum	Sussex	stalk	−	−	−	−	X	−	−	−	−	−
F.spp.405	2011	F. graminearum	Sussex	stalk	−	−	−	−	X	−	−	−	−	−
F.spp.406	2011	F. culmorum	Sussex	stalk	−	X	−	−	−	−	−	−	−	−
F.spp.408	2011	F. culmorum	Sussex	stalk	−	X	−	−	−	−	−	−	−	−
F.spp.409	2011	F. graminearum	Sussex	stalk	−	−	−	−	X	−	−	−	−	−
F.spp.410	2011	F. graminearum	Sussex	stalk	−	−	−	−	X	−	−	−	−	−
F.spp.414	2011	F. culmorum	Sussex	stalk	−	X	−	−	−	−	−	−	−	−
F.spp.417	2011	F. graminearum	Sussex	stalk	−	−	−	−	X	−	−	−	−	−
F.spp.422	2011	F. graminearum	Sussex	stalk	−	−	−	−	X	−	−	−	−	−
F.spp.423	2011	F. graminearum	Sussex	seed	−	−	−	−	X	−	−	−	−	−
F.spp.424	2011	F. cerealis	Sussex	seed	−	−	X	−	−	−	−	−	−	−
F.spp.425	2011	F. graminearum	Sussex	seed	−	−	−	−	X	−	−	−	−	−
F.spp.426	2011	F. cerealis	Sussex	seed	−	−	X	−	−	−	−	−	−	−
F.spp.427	2011	F. culmorum	Sussex	stalk	−	X	−	−	−	−	−	−	−	−
F.spp.428	2011	F. graminearum	Sussex	stalk	−	−	−	−	X	−	−	−	−	−
F.spp.429	2011	F. culmorum	Sussex	stalk	−	X	−	−	−	−	−	−	−	−
F.spp.430	2011	F. cerealis	Sussex	seed	−	−	X	−	−	−	−	−	−	−
F.spp.432	2011	F. poae	Sussex	stalk	−	−	−	−	−	−	X	−	−	−
F.spp.433	2011	F. solani	Sussex	stalk	−	−	−	−	−	−	−	−	−	−
F.spp.435	2011	F. solani	Sussex	stalk	−	−	−	−	−	−	−	−	−	−
F.spp.436	2011	F. cerealis	Sussex	stalk	−	−	X	−	−	−	−	−	−	−
F.spp.440	2011	F. solani	Sussex	stalk	−	−	−	−	−	−	−	−	−	−
F.spp.441	2011	F. graminearum	Sussex	stalk	−	−	−	−	X	−	−	−	−	−
F.spp.442	2011	F. graminearum	Sussex	stalk	−	−	−	−	X	−	−	−	−	−
F.spp.443	2011	F. graminearum	Sussex	stalk	−	−	−	−	X	−	−	−	−	−
F.spp.444	2011	F. graminearum	Sussex	stalk	−	−	−	−	X	−	−	−	−	−
F.spp.445	2011	F. subglutinans	Sussex	stalk	−	−	−	−	−	−	−	−	X	−
F.spp.446	2011	F. solani	Sussex	stalk	−	−	−	−	−	−	−	−	−	−
F.spp.4466	2011	F. culmorum	Nottinghamshire	seed	−	X	−	−	−	−	−	−	−	−
F.spp.447	2011	F. culmorum	Sussex	stalk	−	X	−	−	−	−	−	−	−	−
F.spp.451	2011	F. culmorum	Sussex	stalk	−	X	−	−	−	−	−	−	−	−
F.spp.452	2011	F. graminearum	Sussex	stalk	−	−	−	−	X	−	−	−	−	−
F.spp.454	2011	F. scripi	Sussex	stalk	−	−	−	−	−	−	−	−	−	−
F.spp.455	2011	F. graminearum	Sussex	stalk	−	−	−	−	X	−	−	−	−	−
F.spp.457	2011	F. graminearum	Sussex	stalk	−	−	−	−	X	−	−	−	−	−
F.spp.458	2011	F. culmorum	Sussex	stalk	−	X	−	−	−	−	−	−	−	−
F.spp.460	2011	F. graminearum	Sussex	stalk	−	−	−	−	X	−	−	−	−	−
F.spp.461	2011	F. poae	Sussex	stalk	−	−	−	−	−	−	X	−	−	−
F.spp.462	2011	F. graminearum	Sussex	stalk	−	−	−	−	X	−	−	−	−	−
F.spp.463	2011	F. culmorum	Sussex	stalk	−	X	−	−	−	−	−	−	−	−
F.spp.464	2011	F. culmorum	Sussex	stalk	−	X	−	−	−	−	−	−	−	−
F.spp.465	2011	F. cerealis	Sussex	stalk	−	−	X	−	−	−	−	−	−	−
F.spp.466	2011	F. graminearum	Gloucestershire	stalk	−	−	−	−	X	−	−	−	−	−
F.spp.468	2011	F. culmorum	Gloucestershire	stalk	−	X	−	−	−	−	−	−	−	−
F.spp.469	2011	F. graminearum	Gloucestershire	seed	−	−	−	−	X	−	−	−	−	−
F.spp.474	2011	F. culmorum	Gloucestershire	stalk	−	X	−	−	−	−	−	−	−	−
F.spp.475	2011	F. culmorum	Gloucestershire	stalk	−	X	−	−	−	−	−	−	−	−
F.spp.477	2011	F. graminearum	Gloucestershire	stalk	−	−	−	−	X	−	−	−	−	−
F.spp.491	2011	F. culmorum	Gloucestershire	stalk	−	X	−	−	−	−	−	−	−	−
F.spp.494	2011	F. solani	Sussex	seed	−	−	−	−	−	−	−	−	−	−
F.spp.496	2011	F. culmorum	Gloucestershire	stalk	−	X	−	−	−	−	−	−	−	−
F.spp.499	2011	F. subglutinans	Sussex	seed	−	−	−	−	−	−	−	−	X	−
F.spp.502	2011	F. culmorum	Sussex	seed	−	X	−	−	−	−	−	−	−	−
F.spp.510	2011	F. graminearum	Gloucestershire	stalk	−	−	−	−	X	−	−	−	−	−
F.spp.511	2011	F. solani	Sussex	seed	−	−	−	−	−	−	−	−	−	−
F.spp.520	2011	F. solani	Sussex	seed	−	−	−	−	−	−	−	−	−	−
F.spp.521	2011	F. graminearum	Gloucestershire	stalk	−	−	−	−	X	−	−	−	−	−
F.spp.524	2011	F. culmorum	Gloucestershire	stalk	−	X	−	−	−	−	−	−	−	−
F.spp.539	2011	F. solani	Sussex	seed	−	−	−	−	−	−	−	−	−	−
F.spp.545	2011	F. culmorum	Gloucestershire	stalk	−	X	−	−	−	−	−	−	−	−
F.spp.546	2011	F. graminearum	Gloucestershire	stalk	−	−	−	−	X	−	−	−	−	−
F.spp.551	2011	F. culmorum	Gloucestershire	stalk	−	X	−	−	−	−	−	−	−	−
F.spp.556	2011	F. graminearum	Gloucestershire	stalk	−	−	−	−	X	−	−	−	−	−
F.spp.557	2011	F. culmorum	Gloucestershire	stalk	−	X	−	−	−	−	−	−	−	−
F.spp.558	2011	F. graminearum	Gloucestershire	stalk	−	−	−	−	X	−	−	−	−	−
F.spp.559	2011	F. proliferatrum	Gloucestershire	stalk	−	−	−	−	−	−	−	X	−	−
F.spp.560	2011	F. proliferatrum	Gloucestershire	stalk	−	−	−	−	−	−	−	X	−	−
F.spp.572	2011	F. graminearum	Gloucestershire	seed	−	−	−	−	X	−	−	−	−	−
F.spp.579	2011	F. poae	Gloucestershire	seed	−	−	−	−	−	−	X	−	−	−
F.spp.581	2011	F. culmorum	Gloucestershire	seed	−	X	−	−	−	−	−	−	−	−
F.spp.582	2011	F. culmorum	Gloucestershire	seed	−	X	−	−	−	−	−	−	−	−
F.spp.587	2011	F. culmorum	Gloucestershire	seed	−	X	−	−	−	−	−	−	−	−
F.spp.589	2011	F. proliferatrum	Gloucestershire	seed	−	−	−	−	−	−	−	X	−	−
F.spp.591	2011	F. solani	Gloucestershire	seed	−	−	−	−	−	−	−	−	−	−
F.spp.599	2011	F. culmorum	Gloucestershire	seed	−	X	−	−	−	−	−	−	−	−
F.spp.601	2011	F. culmorum	Gloucestershire	seed	−	X	−	−	−	−	−	−	−	−
F.spp.602	2011	F. verticillioides	Gloucestershire	seed	−	−	−	−	−	−	−	−	−	X
F.spp.604	2011	F. oxysporum	Gloucestershire	seed	−	−	−	−	−	X	−	−	−	−
F.spp.605	2011	F. culmorum	Gloucestershire	seed	−	X	−	−	−	−	−	−	−	−
F.spp.607	2011	F. cerealis	Gloucestershire	seed	−	−	X	−	−	−	−	−	−	−
F.spp.609	2011	F. culmorum	Gloucestershire	seed	−	X	−	−	−	−	−	−	−	−
F.spp.610	2011	F. graminearum	Gloucestershire	seed	−	−	−	−	X	−	−	−	−	−
F.spp.612	2011	F. proliferatrum	Gloucestershire	seed	−	−	−	−	−	−	−	X	−	−
F.spp.613	2011	F. graminearum	Gloucestershire	seed	−	−	−	−	X	−	−	−	−	−
F.spp.616	2011	F. equiseti	Gloucestershire	seed	−	−	−	X	−	−	−	−	−	−
F.spp.617	2011	F. solani	Gloucestershire	seed	−	−	−	−	−	−	−	−	−	−
F.spp.621	2011	F. graminearum	Gloucestershire	seed	−	−	−	−	X	−	−	−	−	−
F.spp.623	2011	F. graminearum	Gloucestershire	seed	−	−	−	−	X	−	−	−	−	−
F.spp.625	2011	F. graminearum	Gloucestershire	seed	−	−	−	−	X	−	−	−	−	−
F.spp.626	2011	F. graminearum	Gloucestershire	seed	−	−	−	−	X	−	−	−	−	−
F.spp.629	2011	F. solani	Gloucestershire	seed	−	−	−	−	−	−	−	−	−	−
F.spp.632	2011	F. cerealis	Gloucestershire	seed	−	−	X	−	−	−	−	−	−	−
F.spp.636	2011	F. graminearum	Oxfordshire	stalk	−	−	−	−	X	−	−	−	−	−
F.spp.637	2011	F. culmorum	Somerset	stalk	−	X	−	−	−	−	−	−	−	−
F.spp.638	2011	F. culmorum	Somerset	stalk	−	X	−	−	−	−	−	−	−	−
F.spp.639	2011	F. graminearum	Gloucestershire	stalk	−	−	−	−	X	−	−	−	−	−
F.spp.643	2011	F. graminearum	Somerset	stalk	−	−	−	−	X	−	−	−	−	−
F.spp.645	2011	F. solani	Shropshire	stalk	−	−	−	−	−	−	−	−	−	−
F.spp.649	2011	F. graminearum	Somerset	stalk	−	−	−	−	X	−	−	−	−	−
F.spp.651	2011	F. graminearum	Gloucestershire	stalk	−	−	−	−	X	−	−	−	−	−
F.spp.653	2011	F. culmorum	Gloucestershire	stalk	−	X	−	−	−	−	−	−	−	−
F.spp.655	2011	F. graminearum	Gloucestershire	stalk	−	−	−	−	X	−	−	−	−	−
F.spp.656	2011	F. graminearum	Gloucestershire	stalk	−	−	−	−	X	−	−	−	−	−
F.spp.657	2011	F. cerealis	Gloucestershire	stalk	−	−	X	−	−	−	−	−	−	−
F.spp.658	2011	F. culmorum	Shropshire	stalk	−	X	−	−	−	−	−	−	−	−
F.spp.660	2011	F. graminearum	Oxfordshire	stalk	−	−	−	−	X	−	−	−	−	−
F.spp.664	2011	F. solani	Oxfordshire	stalk	−	−	−	−	−	−	−	−	−	−
F.spp.668	2011	F. cerealis	Oxfordshire	stalk	−	−	X	−	−	−	−	−	−	−
F.spp.670	2011	F. subglutinans	Shropshire	stalk	−	−	−	−	−	−	−	−	X	−
F.spp.673	2011	F. cerealis	Shropshire	stalk	−	−	X	−	−	−	−	−	−	−
F.spp.677	2011	F. solani	Somerset	stalk	−	−	−	−	−	−	−	−	−	−
F.spp.679	2011	F. solani	Shropshire	stalk	−	−	−	−	−	−	−	−	−	−
F.spp.680	2011	F. solani	Shropshire	stalk	−	−	−	−	−	−	−	−	−	−
F.spp.681	2011	F. graminearum	Somerset	stalk	−	−	−	−	X	−	−	−	−	−
F.spp.682	2011	F. culmorum	Shropshire	stalk	−	X	−	−	−	−	−	−	−	−
F.spp.689	2011	F. graminearum	Oxfordshire	stalk	−	−	−	−	X	−	−	−	−	−
F.spp.695	2011	F. oxysporum	Oxfordshire	stalk	−	−	−	−	−	X	−	−	−	−
F.spp.697	2011	F. graminearum	Gloucestershire	stalk	−	−	−	−	X	−	−	−	−	−
F.spp.699	2011	F. graminearum	Oxfordshire	stalk	−	−	−	−	X	−	−	−	−	−
F.spp.701	2011	F. graminearum	Gloucestershire	stalk	−	−	−	−	X	−	−	−	−	−
F.spp.704	2011	F. graminearum	Gloucestershire	stalk	−	−	−	−	X	−	−	−	−	−
F.spp.705	2011	F. graminearum	Gloucestershire	stalk	−	−	−	−	X	−	−	−	−	−
F.spp.706	2011	F. solani	Somerset	stalk	−	−	−	−	−	−	−	−	−	−
F.spp.707	2011	F. solani	Somerset	stalk	−	−	−	−	−	−	−	−	−	−
F.spp.709	2011	F. graminearum	Somerset	stalk	−	−	−	−	X	−	−	−	−	−
F.spp.710	2011	F. culmorum	Shropshire	stalk	−	X	−	−	−	−	−	−	−	−
F.spp.711	2011	F. graminearum	Gloucestershire	stalk	−	−	−	−	X	−	−	−	−	−
F.spp.712	2011	F. culmorum	Oxfordshire	stalk	−	X	−	−	−	−	−	−	−	−
F.spp.713	2011	F. culmorum	Shropshire	stalk	−	X	−	−	−	−	−	−	−	−
F.spp.715	2011	F. graminearum	Gloucestershire	stalk	−	−	−	−	X	−	−	−	−	−
F.spp.718	2011	F. langsethiae	Gloucestershire	stalk	−	−	−	−	−	−	−	−	−	−
F.spp.719	2011	F. graminearum	Gloucestershire	stalk	−	−	−	−	X	−	−	−	−	−
F.spp.720	2011	F. graminearum	Somerset	stalk	−	−	−	−	X	−	−	−	−	−
F.spp.721	2011	F. culmorum	Shropshire	stalk	−	X	−	−	−	−	−	−	−	−
F.spp.725	2011	F. graminearum	Somerset	stalk	−	−	−	−	X	−	−	−	−	−
F.spp.726	2011	F. graminearum	Gloucestershire	stalk	−	−	−	−	X	−	−	−	−	−
F.spp.727	2011	F. graminearum	Gloucestershire	stalk	−	−	−	−	X	−	−	−	−	−
F.spp.729	2011	F. graminearum	Gloucestershire	stalk	−	−	−	−	X	−	−	−	−	−
F.spp.731	2011	F. cerealis	Oxfordshire	stalk	−	−	X	−	−	−	−	−	−	−
F.spp.732	2011	F. cerealis	Gloucestershire	stalk	−	−	X	−	−	−	−	−	−	−
F.spp.733	2011	F. graminearum	Oxfordshire	stalk	−	−	−	−	X	−	−	−	−	−
F.spp.734	2011	F. culmorum	Oxfordshire	stalk	−	X	−	−	−	−	−	−	−	−
F.spp.735	2011	F. culmorum	Oxfordshire	stalk	−	X	−	−	−	−	−	−	−	−
F.spp.737	2011	F. culmorum	Gloucestershire	stalk	−	X	−	−	−	−	−	−	−	−
F.spp.738	2011	F. graminearum	Gloucestershire	stalk	−	−	−	−	X	−	−	−	−	−
F.spp.740	2011	F. graminearum	Gloucestershire	stalk	−	−	−	−	X	−	−	−	−	−
F.spp.743	2011	F. culmorum	Shropshire	stalk	−	X	−	−	−	−	−	−	−	−
F.spp.744	2011	F. culmorum	Shropshire	stalk	−	X	−	−	−	−	−	−	−	−
F.spp.749	2011	F. culmorum	Somerset	stalk	−	X	−	−	−	−	−	−	−	−
F.spp.752	2011	F. solani	Gloucestershire	stalk	−	−	−	−	−	−	−	−	−	−
F.spp.753	2011	F. avenaceum	Gloucestershire	stalk	X	−	−	−	−	−	−	−	−	−
F.spp.755	2011	F. solani	Somerset	stalk	−	−	−	−	−	−	−	−	−	−
F.spp.758	2011	F. graminearum	Gloucestershire	stalk	−	−	−	−	X	−	−	−	−	−
F.spp.759	2011	F. culmorum	Oxfordshire	stalk	−	X	−	−	−	−	−	−	−	−
F.spp.760	2011	F. graminearum	Oxfordshire	stalk	−	−	−	−	X	−	−	−	−	−
F.spp.777	2011	F. culmorum	Herefordshire	stalk	−	X	−	−	−	−	−	−	−	−
F.spp.778	2011	F. avenaceum	Oxfordshire	stalk	X	−	−	−	−	−	−	−	−	−
F.spp.779	2011	F. graminearum	Yorkshire	stalk	−	−	−	−	X	−	−	−	−	−
F.spp.780	2011	F. graminearum	Yorkshire	stalk	−	−	−	−	X	−	−	−	−	−
F.spp.781	2011	F. solani	Yorkshire	stalk	−	−	−	−	−	−	−	−	−	−
F.spp.782	2011	F. culmorum	Yorkshire	stalk	−	X	−	−	−	−	−	−	−	−
F.spp.783	2011	F. graminearum	Yorkshire	stalk	−	−	−	−	X	−	−	−	−	−
F.spp.785	2011	F. verticillioides	Yorkshire	stalk	−	−	−	−	−	−	−	−	−	X
F.spp.786	2011	F. graminearum	Yorkshire	stalk	−	−	−	−	X	−	−	−	−	−
F.spp.787	2011	F. graminearum	Yorkshire	stalk	−	−	−	−	X	−	−	−	−	−
F.spp.788	2011	F. solani	Yorkshire	stalk	−	−	−	−	−	−	−	−	−	−
F.spp.789	2011	F. graminearum	Yorkshire	stalk	−	−	−	−	X	−	−	−	−	−
F.spp.790	2011	F. avenaceum	Yorkshire	stalk	X	−	−	−	−	−	−	−	−	−
F.spp.792	2011	F. solani	Yorkshire	stalk	−	−	−	−	−	−	−	−	−	−
F.spp.794	2011	F. graminearum	Yorkshire	stalk	−	−	−	−	X	−	−	−	−	−
F.spp.795	2011	F. solani	Yorkshire	stalk	−	−	−	−	−	−	−	−	−	−
F.spp.796	2011	F. graminearum	Yorkshire	stalk	−	−	−	−	X	−	−	−	−	−
F.spp.798	2011	F. solani	Shropshire	stalk	−	−	−	−	−	−	−	−	−	−
F.spp.799	2011	F. solani	Shropshire	stalk	−	−	−	−	−	−	−	−	−	−
F.spp.800	2011	F. avenaceum	Herefordshire	stalk	X	−	−	−	−	−	−	−	−	−
F.spp.802	2011	F. culmorum	Shropshire	stalk	−	X	−	−	−	−	−	−	−	−
F.spp.805	2011	F. solani	Oxfordshire	stalk	−	−	−	−	−	−	−	−	−	−
F.spp.808	2011	F. avenaceum	Herefordshire	stalk	X	−	−	−	−	−	−	−	−	−
F.spp.809	2011	F. avenaceum	Herefordshire	stalk	X	−	−	−	−	−	−	−	−	−
F.spp.810	2011	F. cerealis	Herefordshire	stalk	−	−	X	−	−	−	−	−	−	−
F.spp.812	2011	F. culmorum	Oxfordshire	stalk	−	X	−	−	−	−	−	−	−	−
F.spp.813	2011	F. solani	Oxfordshire	stalk	−	−	−	−	−	−	−	−	−	−
F.spp.814	2011	F. solani	Herefordshire	stalk	−	−	−	−	−	−	−	−	−	−
F.spp.817	2011	F. avenaceum	Yorkshire	stalk	X	−	−	−	−	−	−	−	−	−
F.spp.819	2011	F. graminearum	Yorkshire	stalk	−	−	−	−	X	−	−	−	−	−
F.spp.820	2011	F. graminearum	Yorkshire	stalk	−	−	−	−	X	−	−	−	−	−
F.spp.824	2011	F. graminearum	Yorkshire	stalk	−	−	−	−	X	−	−	−	−	−
F.spp.825	2011	F. graminearum	Yorkshire	stalk	−	−	−	−	X	−	−	−	−	−
F.spp.829	2011	F. avenaceum	Yorkshire	stalk	X	−	−	−	−	−	−	−	−	−
F.spp.831	2011	F. graminearum	Yorkshire	stalk	−	−	−	−	X	−	−	−	−	−
F.spp.832	2011	F. culmorum	Yorkshire	stalk	−	X	−	−	−	−	−	−	−	−
F.spp.834	2011	F. verticillioides	Yorkshire	stalk	−	−	−	−	−	−	−	−	−	X
F.spp.836	2011	F. culmorum	Yorkshire	stalk	−	X	−	−	−	−	−	−	−	−
F.spp.838	2011	F. solani	Yorkshire	stalk	−	−	−	−	−	−	−	−	−	−
F.spp.839	2011	F. culmorum	Shropshire	stalk	−	X	−	−	−	−	−	−	−	−
F.spp.844	2011	F. solani	Yorkshire	stalk	−	−	−	−	−	−	−	−	−	−
F.spp.845	2011	F. avenaceum	Yorkshire	stalk	X	−	−	−	−	−	−	−	−	−
F.spp.849	2011	F. graminearum	Yorkshire	stalk	−	−	−	−	X	−	−	−	−	−
F.spp.853	2011	F. langsethiae	Somerset	seed	−	−	−	−	−	−	−	−	−	−
F.spp.855	2011	F. culmorum	Somerset	seed	−	X	−	−	−	−	−	−	−	−
F.spp.856	2011	F. poae	Oxfordshire	seed	−	−	−	−	−	−	X	−	−	−
F.spp.857	2011	F. poae	Oxfordshire	seed	−	−	−	−	−	−	X	−	−	−
F.spp.858	2011	F. graminearum	Oxfordshire	seed	−	−	−	−	X	−	−	−	−	−
F.spp.859	2011	F. cerealis	Shropshire	seed	−	−	X	−	−	−	−	−	−	−
F.spp.863	2011	F. graminearum	Gloucestershire	stalk	−	−	−	−	X	−	−	−	−	−
F.spp.869	2011	F. graminearum	Oxfordshire	seed	−	−	−	−	X	−	−	−	−	−
F.spp.871	2011	F. poae	Gloucestershire	seed	−	−	−	−	−	−	X	−	−	−
F.spp.872	2011	F. graminearum	Gloucestershire	stalk	−	−	−	−	X	−	−	−	−	−
F.spp.873	2011	F. culmorum	Gloucestershire	stalk	−	X	−	−	−	−	−	−	−	−
F.spp.875	2011	F. verticillioides	Gloucestershire	stalk	−	−	−	−	−	−	−	−	−	X
F.spp.876	2011	F. graminearum	Gloucestershire	seed	−	−	−	−	X	−	−	−	−	−
F.spp.877	2011	F. graminearum	Oxfordshire	seed	−	−	−	−	X	−	−	−	−	−
F.spp.878	2011	F. graminearum	Oxfordshire	seed	−	−	−	−	X	−	−	−	−	−
F.spp.879	2011	F. culmorum	Gloucestershire	seed	−	X	−	−	−	−	−	−	−	−
F.spp.880	2011	F. cerealis	Gloucestershire	seed	−	−	X	−	−	−	−	−	−	−
F.spp.881	2011	F. culmorum	Shropshire	seed	−	X	−	−	−	−	−	−	−	−
F.spp.882	2011	F. graminearum	Oxfordshire	seed	−	−	−	−	X	−	−	−	−	−
F.spp.883	2011	F. cerealis	Shropshire	seed	−	−	X	−	−	−	−	−	−	−
F.spp.884	2011	F. culmorum	Shropshire	seed	−	X	−	−	−	−	−	−	−	−
F.spp.887	2011	F. cerealis	Gloucestershire	stalk	−	−	X	−	−	−	−	−	−	−
F.spp.888	2011	F. cerealis	Gloucestershire	stalk	−	−	X	−	−	−	−	−	−	−
F.spp.894	2011	F. graminearum	Oxfordshire	seed	−	−	−	−	X	−	−	−	−	−
F.spp.896	2011	F. culmorum	Somerset	seed	−	X	−	−	−	−	−	−	−	−
F.spp.897	2011	F. graminearum	Oxfordshire	seed	−	−	−	−	X	−	−	−	−	−
F.spp.898	2011	F. graminearum	Gloucestershire	seed	−	−	−	−	X	−	−	−	−	−
F.spp.899	2011	F. graminearum	Gloucestershire	seed	−	−	−	−	X	−	−	−	−	−
F.spp.900	2011	F. culmorum	Shropshire	seed	−	X	−	−	−	−	−	−	−	−
F.spp.902	2011	F. cerealis	Shropshire	seed	−	−	X	−	−	−	−	−	−	−
F.spp.903	2011	F. culmorum	Shropshire	seed	−	X	−	−	−	−	−	−	−	−
F.spp.904	2011	F. graminearum	Oxfordshire	seed	−	−	−	−	X	−	−	−	−	−
F.spp.905	2011	F. graminearum	Oxfordshire	seed	−	−	−	−	X	−	−	−	−	−
F.spp.906	2011	F. graminearum	Gloucestershire	seed	−	−	−	−	X	−	−	−	−	−
F.spp.907	2011	F. poae	Oxfordshire	seed	−	−	−	−	−	−	X	−	−	−
F.spp.908	2011	F. poae	Gloucestershire	seed	−	−	−	−	−	−	X	−	−	−
F.spp.910	2011	F. cerealis	Oxfordshire	seed	−	−	X	−	−	−	−	−	−	−
F.spp.911	2011	F. graminearum	Gloucestershire	seed	−	−	−	−	X	−	−	−	−	−
F.spp.912	2011	F. solani	Oxfordshire	seed	−	−	−	−	−	−	−	−	−	−
F.spp.913	2011	F. graminearum	Oxfordshire	seed	−	−	−	−	X	−	−	−	−	−
F.spp.914	2011	F. graminearum	Oxfordshire	seed	−	−	−	−	X	−	−	−	−	−
F.spp.915	2011	F. solani	Oxfordshire	seed	−	−	−	−	−	−	−	−	−	−
F.spp.916	2011	F. cerealis	Gloucestershire	seed	−	−	X	−	−	−	−	−	−	−
F.spp.917	2011	F. cerealis	Gloucestershire	seed	−	−	X	−	−	−	−	−	−	−
F.spp.918	2011	F. solani	Oxfordshire	seed	−	−	−	−	−	−	−	−	−	−
F.spp.919	2011	F. cerealis	Shropshire	seed	−	−	X	−	−	−	−	−	−	−
F.spp.921	2011	F. avenaceum	Somerset	seed	X	−	−	−	−	−	−	−	−	−
F.spp.922	2011	F. cerealis	Somerset	seed	−	−	X	−	−	−	−	−	−	−
F.spp.925	2011	F. culmorum	Gloucestershire	seed	−	X	−	−	−	−	−	−	−	−
F.spp.926	2011	F. poae	Oxfordshire	seed	−	−	−	−	−	−	X	−	−	−
F.spp.927	2011	F. cerealis	Shropshire	seed	−	−	X	−	−	−	−	−	−	−
F.spp.928	2011	F. graminearum	Gloucestershire	seed	−	−	−	−	X	−	−	−	−	−
F.spp.929	2011	F. culmorum	Somerset	seed	−	X	−	−	−	−	−	−	−	−
F.spp.930	2011	F. culmorum	Somerset	seed	−	X	−	−	−	−	−	−	−	−
F.spp.933	2011	F. culmorum	Gloucestershire	seed	−	X	−	−	−	−	−	−	−	−
F.spp.934	2011	F. culmorum	Gloucestershire	seed	−	X	−	−	−	−	−	−	−	−
F.spp.935	2011	F. graminearum	Oxfordshire	seed	−	−	−	−	X	−	−	−	−	−
F.spp.936	2011	F. graminearum	Oxfordshire	seed	−	−	−	−	X	−	−	−	−	−
F.spp.937	2011	F. culmorum	Oxfordshire	seed	−	X	−	−	−	−	−	−	−	−
F.spp.939	2011	F. graminearum	Oxfordshire	seed	−	−	−	−	X	−	−	−	−	−
F.spp.940	2011	F. graminearum	Somerset	seed	−	−	−	−	X	−	−	−	−	−
F.spp.941	2011	F. graminearum	Somerset	seed	−	−	−	−	X	−	−	−	−	−
F.spp.942	2011	F. graminearum	Yorkshire	stalk	−	−	−	−	X	−	−	−	−	−
F.spp.944	2011	F. solani	Yorkshire	stalk	−	−	−	−	−	−	−	−	−	−
F.spp.945	2011	F. culmorum	Yorkshire	stalk	−	X	−	−	−	−	−	−	−	−
F.spp.946	2011	F. culmorum	Yorkshire	stalk	−	X	−	−	−	−	−	−	−	−
F.spp.947	2011	F. cerealis	Yorkshire	stalk	−	−	X	−	−	−	−	−	−	−
F.spp.948	2011	F. culmorum	Shropshire	seed	−	X	−	−	−	−	−	−	−	−
F.spp.949	2011	F. culmorum	Gloucestershire	stalk	−	X	−	−	−	−	−	−	−	−
F.spp.950	2011	F. graminearum	Gloucestershire	seed	−	−	−	−	X	−	−	−	−	−
F.spp.951	2011	F. cerealis	Shropshire	seed	−	−	X	−	−	−	−	−	−	−
F.spp.952	2011	F. cerealis	Shropshire	seed	−	−	X	−	−	−	−	−	−	−
F.spp.953	2011	F. culmorum	Oxfordshire	seed	−	X	−	−	−	−	−	−	−	−
F.spp.954	2011	F. graminearum	Oxfordshire	seed	−	−	−	−	X	−	−	−	−	−
F.spp.955	2011	F. graminearum	Gloucestershire	seed	−	−	−	−	X	−	−	−	−	−
F.spp.956	2011	F. graminearum	Oxfordshire	stalk	−	−	−	−	X	−	−	−	−	−
F.spp.957	2011	F. solani	Oxfordshire	stalk	−	−	−	−	−	−	−	−	−	−
F.spp.959	2011	F. graminearum	Yorkshire	stalk	−	−	−	−	X	−	−	−	−	−
F.spp.963	2011	F. graminearum	Yorkshire	stalk	−	−	−	−	X	−	−	−	−	−
F.spp.965	2011	F. graminearum	Yorkshire	stalk	−	−	−	−	X	−	−	−	−	−
F.spp.966	2011	F. culmorum	Yorkshire	stalk	−	X	−	−	−	−	−	−	−	−
F.spp.969	2011	F. culmorum	Yorkshire	stalk	−	X	−	−	−	−	−	−	−	−
F.spp.971	2011	F. culmorum	Yorkshire	stalk	−	X	−	−	−	−	−	−	−	−
F.spp.972	2011	F. cerealis	Shropshire	stalk	−	−	X	−	−	−	−	−	−	−
F.spp.973	2011	F. graminearum	Yorkshire	stalk	−	−	−	−	X	−	−	−	−	−
F.spp.975	2011	F. graminearum	Yorkshire	stalk	−	−	−	−	X	−	−	−	−	−
F.spp.976	2011	F. graminearum	Yorkshire	stalk	−	−	−	−	X	−	−	−	−	−
F.spp.978	2011	F. graminearum	Yorkshire	stalk	−	−	−	−	X	−	−	−	−	−
F.spp.979	2011	F. solani	Yorkshire	stalk	−	−	−	−	−	−	−	−	−	−
F.spp.981	2011	F. avenaceum	Yorkshire	stalk	X	−	−	−	−	−	−	−	−	−
F.spp.986	2011	F. culmorum	Yorkshire	stalk	−	X	−	−	−	−	−	−	−	−
F.spp.988	2011	F. graminearum	Yorkshire	stalk	−	−	−	−	X	−	−	−	−	−
F.spp.989	2011	F. culmorum	Yorkshire	stalk	−	X	−	−	−	−	−	−	−	−
F.spp.990	2011	F. graminearum	Yorkshire	stalk	−	−	−	−	X	−	−	−	−	−
F.spp.991	2011	F. graminearum	Yorkshire	stalk	−	−	−	−	X	−	−	−	−	−
F.spp.993	2011	F. graminearum	Oxfordshire	stalk	−	−	−	−	X	−	−	−	−	−
F.spp.995	2011	F. solani	Yorkshire	stalk	−	−	−	−	−	−	−	−	−	−
F.spp.998	2011	F. culmorum	Shropshire	stalk	−	X	−	−	−	−	−	−	−	−
F.spp.3502	2012	F. graminearum	Kent	Stalk	−	−	−	−	X	−	−	−	−	−
F.spp.3508	2012	F. graminearum	Kent	Stalk	−	−	−	−	X	−	−	−	−	−
F.spp.3517	2012	F. graminearum	Kent	Stalk	−	−	−	−	X	−	−	−	−	−
F.spp.3519	2012	F. graminearum	Kent	Stalk	−	−	−	−	X	−	−	−	−	−
F.spp.3524	2012	F. graminearum	Kent	Stalk	−	−	−	−	X	−	−	−	−	−
F.spp.3525	2012	F. graminearum	Kent	Stalk	−	−	−	−	X	−	−	−	−	−
F.spp.3527	2012	F. culmorum	Kent	Stalk	−	X	−	−	−	−	−	−	−	−
F.spp.3536	2012	F. graminearum	Kent	Stalk	−	−	−	−	X	−	−	−	−	−
F.spp.3537	2012	F. culmorum	Kent	Stalk	−	X	−	−	−	−	−	−	−	−
F.spp.3567	2012	F. culmorum	Kent	Stalk	−	X	−	−	−	−	−	−	−	−
F.spp.3570	2012	F. culmorum	Kent	Stalk	−	X	−	−	−	−	−	−	−	−
F.spp.3574	2012	F. graminearum	Kent	Stalk	−	−	−	−	X	−	−	−	−	−
F.spp.3576	2012	F. graminearum	Kent	Stalk	−	−	−	−	X	−	−	−	−	−
F.spp.3581	2012	F. graminearum	Kent	Stalk	−	−	−	−	X	−	−	−	−	−
F.spp.3591	2012	F. graminearum	Kent	Stalk	−	−	−	−	X	−	−	−	−	−
F.spp.3595	2012	F. culmorum	Kent	Stalk	−	X	−	−	−	−	−	−	−	−
F.spp.3597	2012	F. graminearum	Kent	Stalk	−	−	−	−	X	−	−	−	−	−
F.spp.3598	2012	F. graminearum	Kent	Stalk	−	−	−	−	X	−	−	−	−	−
F.spp.3609	2012	F. graminearum	Kent	Stalk	−	−	−	−	X	−	−	−	−	−
F.spp.3616	2012	F. graminearum	Kent	Stalk	−	−	−	−	X	−	−	−	−	−
F.spp.3623	2012	F. culmorum	Kent	Stalk	−	X	−	−	−	−	−	−	−	−
F.spp.3624	2012	F. graminearum	Kent	Stalk	−	−	−	−	X	−	−	−	−	−
F.spp.3625	2012	F. graminearum	Kent	Stalk	−	−	−	−	X	−	−	−	−	−
F.spp.3632	2012	F. graminearum	Kent	Stalk	−	−	−	−	X	−	−	−	−	−
F.spp.3634	2012	F. graminearum	Kent	Stalk	−	−	−	−	X	−	−	−	−	−
F.spp.3636	2012	F. graminearum	Kent	Stalk	−	−	−	−	X	−	−	−	−	−
F.spp.3639	2012	F. graminearum	Kent	Stalk	−	−	−	−	X	−	−	−	−	−
F.spp.3641	2012	F. graminearum	Kent	Stalk	−	−	−	−	X	−	−	−	−	−
F.spp.3642	2012	F. culmorum	Kent	Stalk	−	X	−	−	−	−	−	−	−	−
F.spp.3643	2012	F. graminearum	Kent	Stalk	−	−	−	−	X	−	−	−	−	−
F.spp.3648	2012	F. culmorum	Shropshire	Stalk	−	X	−	−	−	−	−	−	−	−
F.spp.3651	2012	F. graminearum	Shropshire	Stalk	−	−	−	−	X	−	−	−	−	−
F.spp.3653	2012	F. culmorum	Shropshire	Stalk	−	X	−	−	−	−	−	−	−	−
F.spp.3661	2012	F. culmorum	Shropshire	Stalk	−	X	−	−	−	−	−	−	−	−
F.spp.3662	2012	F. graminearum	Shropshire	Stalk	−	−	−	−	X	−	−	−	−	−
F.spp.3669	2012	F. culmorum	Shropshire	Stalk	−	X	−	−	−	−	−	−	−	−
F.spp.3677	2012	F. culmorum	Shropshire	Stalk	−	X	−	−	−	−	−	−	−	−
F.spp.3683	2012	F. culmorum	Shropshire	Stalk	−	X	−	−	−	−	−	−	−	−
F.spp.3684	2012	F. graminearum	Shropshire	Stalk	−	−	−	−	X	−	−	−	−	−
F.spp.3687	2012	F. culmorum	Shropshire	Stalk	−	X	−	−	−	−	−	−	−	−
F.spp.3689	2012	F. graminearum	Shropshire	Stalk	−	−	−	−	X	−	−	−	−	−
F.spp.3697	2012	F. culmorum	Shropshire	Stalk	−	X	−	−	−	−	−	−	−	−
F.spp.3701	2012	F. culmorum	Shropshire	Stalk	−	X	−	−	−	−	−	−	−	−
F.spp.3704	2012	F. graminearum	Shropshire	Stalk	−	−	−	−	X	−	−	−	−	−
F.spp.3706	2012	F. graminearum	Shropshire	Stalk	−	−	−	−	X	−	−	−	−	−
F.spp.3708	2012	F. culmorum	Shropshire	Stalk	−	X	−	−	−	−	−	−	−	−
F.spp.3716	2012	F. culmorum	Shropshire	Stalk	−	X	−	−	−	−	−	−	−	−
F.spp.3718	2012	F. graminearum	Shropshire	Stalk	−	−	−	−	X	−	−	−	−	−
F.spp.3722	2012	F. culmorum	Shropshire	Stalk	−	X	−	−	−	−	−	−	−	−
F.spp.3726	2012	F. graminearum	Shropshire	Stalk	−	−	−	−	X	−	−	−	−	−
F.spp.3732	2012	F. culmorum	Shropshire	Stalk	−	X	−	−	−	−	−	−	−	−
F.spp.3736	2012	F. culmorum	Shropshire	Stalk	−	X	−	−	−	−	−	−	−	−
F.spp.3741	2012	F. culmorum	Shropshire	Stalk	−	X	−	−	−	−	−	−	−	−
F.spp.3744	2012	F. graminearum	Shropshire	Stalk	−	−	−	−	X	−	−	−	−	−
F.spp.3745	2012	F. graminearum	Shropshire	Stalk	−	−	−	−	X	−	−	−	−	−
F.spp.3751	2012	F. culmorum	Shropshire	Stalk	−	X	−	−	−	−	−	−	−	−
F.spp.3757	2012	F. culmorum	Shropshire	Stalk	−	X	−	−	−	−	−	−	−	−
F.spp.3761	2012	F. culmorum	Shropshire	Stalk	−	X	−	−	−	−	−	−	−	−
F.spp.3764	2012	F. graminearum	Shropshire	Stalk	−	−	−	−	X	−	−	−	−	−
F.spp.3778	2012	F. culmorum	Shropshire	Stalk	−	X	−	−	−	−	−	−	−	−
F.spp.3780	2012	F. culmorum	Shropshire	Stalk	−	X	−	−	−	−	−	−	−	−
F.spp.3783	2012	F. culmorum	Shropshire	Stalk	−	X	−	−	−	−	−	−	−	−
F.spp.3784	2012	F. culmorum	Shropshire	Stalk	−	X	−	−	−	−	−	−	−	−
F.spp.3792	2012	F. culmorum	Shropshire	Stalk	−	X	−	−	−	−	−	−	−	−
F.spp.3795	2012	F. culmorum	Shropshire	seed	−	X	−	−	−	−	−	−	−	−
F.spp.3796	2012	F. culmorum	Shropshire	seed	−	X	−	−	−	−	−	−	−	−
F.spp.3797	2012	F. culmorum	Shropshire	seed	−	X	−	−	−	−	−	−	−	−
F.spp.3799	2012	F. culmorum	Shropshire	seed	−	X	−	−	−	−	−	−	−	−
F.spp.3800	2012	F. culmorum	Shropshire	seed	−	X	−	−	−	−	−	−	−	−
F.spp.3814	2012	F. graminearum	Shropshire	seed	−	−	−	−	X	−	−	−	−	−
F.spp.3816	2012	F. graminearum	Shropshire	seed	−	−	−	−	X	−	−	−	−	−
F.spp.3818	2012	F. graminearum	Shropshire	seed	−	−	−	−	X	−	−	−	−	−
F.spp.3819	2012	F. graminearum	Shropshire	seed	−	−	−	−	X	−	−	−	−	−
F.spp.3863	2012	F. graminearum	Kent	seed	−	−	−	−	X	−	−	−	−	−
F.spp.3897	2012	F. graminearum	Kent	seed	−	−	−	−	X	−	−	−	−	−
F.spp.3929	2012	F. graminearum	Kent	seed	−	−	−	−	X	−	−	−	−	−
F.spp.3957	2012	F. graminearum	Kent	seed	−	−	−	−	X	−	−	−	−	−
F.spp.3967	2012	F. graminearum	Herefordshire	Stalk	−	−	−	−	X	−	−	−	−	−
F.spp.3969	2012	F. culmorum	Herefordshire	Stalk	−	X	−	−	−	−	−	−	−	−
F.spp.3970	2012	F. graminearum	Herefordshire	Stalk	−	−	−	−	X	−	−	−	−	−
F.spp.3972	2012	F. culmorum	Herefordshire	Stalk	−	X	−	−	−	−	−	−	−	−
F.spp.3973	2012	F. graminearum	Herefordshire	Stalk	−	−	−	−	X	−	−	−	−	−
F.spp.3979	2012	F. graminearum	Herefordshire	Stalk	−	−	−	−	X	−	−	−	−	−
F.spp.3981	2012	F. culmorum	Herefordshire	Stalk	−	X	−	−	−	−	−	−	−	−
F.spp.3983	2012	F. culmorum	Herefordshire	Stalk	−	X	−	−	−	−	−	−	−	−
F.spp.3984	2012	F. culmorum	Herefordshire	Stalk	−	X	−	−	−	−	−	−	−	−
F.spp.3986	2012	F. culmorum	Herefordshire	Stalk	−	X	−	−	−	−	−	−	−	−
F.spp.3988	2012	F. culmorum	Herefordshire	Stalk	−	X	−	−	−	−	−	−	−	−
F.spp.3990	2012	F. graminearum	Herefordshire	Stalk	−	−	−	−	X	−	−	−	−	−
F.spp.3992	2012	F. graminearum	Herefordshire	Stalk	−	−	−	−	X	−	−	−	−	−
F.spp.3993	2012	F. graminearum	Herefordshire	Stalk	−	−	−	−	X	−	−	−	−	−
F.spp.3994	2012	F. graminearum	Herefordshire	Stalk	−	−	−	−	X	−	−	−	−	−
F.spp.3995	2012	F. culmorum	Herefordshire	Stalk	−	X	−	−	−	−	−	−	−	−
F.spp.3996	2012	F. culmorum	Herefordshire	Stalk	−	X	−	−	−	−	−	−	−	−
F.spp.3997	2012	F. graminearum	Herefordshire	Stalk	−	−	−	−	X	−	−	−	−	−
F.spp.3998	2012	F. culmorum	Herefordshire	Stalk	−	X	−	−	−	−	−	−	−	−
F.spp.4000	2012	F. culmorum	Herefordshire	Stalk	−	X	−	−	−	−	−	−	−	−
F.spp.4001	2012	F. culmorum	Herefordshire	Stalk	−	X	−	−	−	−	−	−	−	−
F.spp.4003	2012	F. culmorum	Herefordshire	Stalk	−	X	−	−	−	−	−	−	−	−
F.spp.4004	2012	F. graminearum	Herefordshire	Stalk	−	−	−	−	X	−	−	−	−	−
F.spp.4005	2012	F. culmorum	Herefordshire	Stalk	−	X	−	−	−	−	−	−	−	−
F.spp.4008	2012	F. graminearum	Herefordshire	Stalk	−	−	−	−	X	−	−	−	−	−
F.spp.4009	2012	F. culmorum	Herefordshire	Stalk	−	X	−	−	−	−	−	−	−	−
F.spp.4010	2012	F. culmorum	Herefordshire	Stalk	−	X	−	−	−	−	−	−	−	−
F.spp.4012	2012	F. culmorum	Herefordshire	Stalk	−	X	−	−	−	−	−	−	−	−
F.spp.4014	2012	F. culmorum	Herefordshire	Stalk	−	X	−	−	−	−	−	−	−	−
F.spp.4015	2012	F. graminearum	Herefordshire	Stalk	−	−	−	−	X	−	−	−	−	−
F.spp.4016	2012	F. graminearum	Herefordshire	Stalk	−	−	−	−	X	−	−	−	−	−
F.spp.4019	2012	F. culmorum	Herefordshire	Stalk	−	X	−	−	−	−	−	−	−	−
F.spp.4020	2012	F. graminearum	Herefordshire	Stalk	−	−	−	−	X	−	−	−	−	−
F.spp.4030	2012	F. culmorum	Herefordshire	Stalk	−	X	−	−	−	−	−	−	−	−
F.spp.4036	2012	F. graminearum	Herefordshire	Stalk	−	−	−	−	X	−	−	−	−	−
F.spp.4040	2012	F. graminearum	Herefordshire	Stalk	−	−	−	−	X	−	−	−	−	−
F.spp.4044	2012	F. graminearum	Herefordshire	Stalk	−	−	−	−	X	−	−	−	−	−
F.spp.4047	2012	F. culmorum	Herefordshire	Stalk	−	X	−	−	−	−	−	−	−	−
F.spp.4051	2012	F. culmorum	Herefordshire	Stalk	−	X	−	−	−	−	−	−	−	−
F.spp.4056	2012	F. graminearum	York	Stalk	−	−	−	−	X	−	−	−	−	−
F.spp.4057	2012	F. graminearum	York	Stalk	−	−	−	−	X	−	−	−	−	−
F.spp.4058	2012	F. graminearum	York	Stalk	−	−	−	−	X	−	−	−	−	−
F.spp.4063	2012	F. graminearum	York	Stalk	−	−	−	−	X	−	−	−	−	−
F.spp.4064	2012	F. culmorum	York	Stalk	−	X	−	−	−	−	−	−	−	−
F.spp.4065	2012	F. culmorum	York	Stalk	−	X	−	−	−	−	−	−	−	−
F.spp.4067	2012	F. culmorum	York	Stalk	−	X	−	−	−	−	−	−	−	−
F.spp.4069	2012	F. culmorum	York	Stalk	−	X	−	−	−	−	−	−	−	−
F.spp.4072	2012	F. culmorum	York	Stalk	−	X	−	−	−	−	−	−	−	−
F.spp.4073	2012	F. graminearum	York	Stalk	−	−	−	−	X	−	−	−	−	−
F.spp.4076	2012	F. graminearum	York	Stalk	−	−	−	−	X	−	−	−	−	−
F.spp.4079	2012	F. culmorum	York	Stalk	−	X	−	−	−	−	−	−	−	−
F.spp.4080	2012	F. graminearum	York	Stalk	−	−	−	−	X	−	−	−	−	−
F.spp.4082	2012	F. graminearum	York	Stalk	−	−	−	−	X	−	−	−	−	−
F.spp.4091	2012	F. culmorum	York	Stalk	−	X	−	−	−	−	−	−	−	−
F.spp.4094	2012	F. graminearum	York	Stalk	−	−	−	−	X	−	−	−	−	−
F.spp.4096	2012	F. culmorum	York	Stalk	−	X	−	−	−	−	−	−	−	−
F.spp.4099	2012	F. culmorum	York	Stalk	−	X	−	−	−	−	−	−	−	−
F.spp.4100	2012	F. graminearum	York	Stalk	−	−	−	−	X	−	−	−	−	−
F.spp.4104	2012	F. culmorum	York	Stalk	−	X	−	−	−	−	−	−	−	−
F.spp.4107	2012	F. culmorum	York	Stalk	−	X	−	−	−	−	−	−	−	−
F.spp.4112	2012	F. culmorum	York	Stalk	−	X	−	−	−	−	−	−	−	−
F.spp.4113	2012	F. culmorum	York	Stalk	−	X	−	−	−	−	−	−	−	−
F.spp.4115	2012	F. graminearum	York	Stalk	−	−	−	−	X	−	−	−	−	−
F.spp.4116	2012	F. culmorum	York	Stalk	−	X	−	−	−	−	−	−	−	−
F.spp.4117	2012	F. culmorum	York	Stalk	−	X	−	−	−	−	−	−	−	−
F.spp.4118	2012	F. culmorum	York	Stalk	−	X	−	−	−	−	−	−	−	−
F.spp.4119	2012	F. culmorum	York	Stalk	−	X	−	−	−	−	−	−	−	−
F.spp.4120	2012	F. culmorum	York	Stalk	−	X	−	−	−	−	−	−	−	−
F.spp.4123	2012	F. graminearum	York	Stalk	−	−	−	−	X	−	−	−	−	−
F.spp.4124	2012	F. graminearum	York	Stalk	−	−	−	−	X	−	−	−	−	−
F.spp.4126	2012	F. graminearum	York	Stalk	−	−	−	−	X	−	−	−	−	−
F.spp.4128	2012	F. culmorum	York	Stalk	−	X	−	−	−	−	−	−	−	−
F.spp.4129	2012	F. culmorum	York	Stalk	−	X	−	−	−	−	−	−	−	−
F.spp.4131	2012	F. culmorum	York	Stalk	−	X	−	−	−	−	−	−	−	−
F.spp.4132	2012	F. graminearum	York	Stalk	−	−	−	−	X	−	−	−	−	−
F.spp.4134	2012	F. graminearum	York	Stalk	−	−	−	−	X	−	−	−	−	−
F.spp.4135	2012	F. culmorum	York	Stalk	−	X	−	−	−	−	−	−	−	−
F.spp.4137	2012	F. graminearum	York	Stalk	−	−	−	−	X	−	−	−	−	−
F.spp.4138	2012	F. graminearum	York	Stalk	−	−	−	−	X	−	−	−	−	−
F.spp.4153	2012	F. culmorum	York	Stalk	−	X	−	−	−	−	−	−	−	−
F.spp.4158	2012	F. culmorum	Herefordshire	seed	−	X	−	−	−	−	−	−	−	−
F.spp.4159	2012	F. graminearum	Herefordshire	seed	−	−	−	−	X	−	−	−	−	−
F.spp.4164	2012	F. culmorum	Herefordshire	seed	−	X	−	−	−	−	−	−	−	−
F.spp.4175	2012	F. graminearum	York	seed	−	−	−	−	X	−	−	−	−	−
F.spp.4187	2012	F. graminearum	York	seed	−	−	−	−	X	−	−	−	−	−
F.spp.4189	2012	F. graminearum	York	seed	−	−	−	−	X	−	−	−	−	−
F.spp.4193	2012	F. culmorum	Devon	Stalk	−	X	−	−	−	−	−	−	−	−
F.spp.4194	2012	F. culmorum	Devon	Stalk	−	X	−	−	−	−	−	−	−	−
F.spp.4197	2012	F. graminearum	Devon	Stalk	−	−	−	−	X	−	−	−	−	−
F.spp.4202	2012	F. graminearum	Devon	Stalk	−	−	−	−	X	−	−	−	−	−
F.spp.4205	2012	F. graminearum	Devon	Stalk	−	−	−	−	X	−	−	−	−	−
F.spp.4210	2012	F. graminearum	Devon	Stalk	−	−	−	−	X	−	−	−	−	−
F.spp.4212	2012	F. graminearum	Devon	Stalk	−	−	−	−	X	−	−	−	−	−
F.spp.4213	2012	F. graminearum	Devon	Stalk	−	−	−	−	X	−	−	−	−	−
F.spp.4214	2012	F. graminearum	Devon	Stalk	−	−	−	−	X	−	−	−	−	−
F.spp.4218	2012	F. graminearum	Devon	Stalk	−	−	−	−	X	−	−	−	−	−
F.spp.4221	2012	F. culmorum	Devon	Stalk	−	X	−	−	−	−	−	−	−	−
F.spp.4222	2012	F. graminearum	Devon	Stalk	−	−	−	−	X	−	−	−	−	−
F.spp.4223	2012	F. graminearum	Devon	Stalk	−	−	−	−	X	−	−	−	−	−
F.spp.4225	2012	F. graminearum	Devon	Stalk	−	−	−	−	X	−	−	−	−	−
F.spp.4238	2012	F. culmorum	Devon	Stalk	−	X	−	−	−	−	−	−	−	−
F.spp.4240	2012	F. graminearum	Devon	Stalk	−	−	−	−	X	−	−	−	−	−
F.spp.4246	2012	F. graminearum	Devon	Stalk	−	−	−	−	X	−	−	−	−	−
F.spp.4252	2012	F. graminearum	Devon	Stalk	−	−	−	−	X	−	−	−	−	−
F.spp.4257	2012	F. graminearum	Devon	Stalk	−	−	−	−	X	−	−	−	−	−
F.spp.4258	2012	F. graminearum	Devon	Stalk	−	−	−	−	X	−	−	−	−	−
F.spp.4271	2012	F. culmorum	Devon	Stalk	−	X	−	−	−	−	−	−	−	−
F.spp.4273	2012	F. graminearum	Devon	Stalk	−	−	−	−	X	−	−	−	−	−
F.spp.4276	2012	F. culmorum	Devon	Stalk	−	X	−	−	−	−	−	−	−	−
F.spp.4277	2012	F. avenaceum	Yorkshire	stalk	X	−	−	−	−	−	−	−	−	−
F.spp.4278	2012	F. avenaceum	Yorkshire	stalk	X	−	−	−	−	−	−	−	−	−
F.spp.4279	2012	F. cerealis	Yorkshire	stalk	−	−	X	−	−	−	−	−	−	−
F.spp.4280	2012	F. cerealis	Yorkshire	stalk	−	−	X	−	−	−	−	−	−	−
F.spp.4281	2012	F. cerealis	Yorkshire	stalk	−	−	X	−	−	−	−	−	−	−
F.spp.4282	2012	F. cerealis	Yorkshire	stalk	−	−	X	−	−	−	−	−	−	−
F.spp.4283	2012	F. cerealis	Yorkshire	stalk	−	−	X	−	−	−	−	−	−	−
F.spp.4284	2012	F. solani	Yorkshire	seed	−	−	−	−	−	−	−	−	−	−
F.spp.4285	2012	F. solani	Yorkshire	seed	−	−	−	−	−	−	−	−	−	−
F.spp.4286	2012	F. solani	Yorkshire	seed	−	−	−	−	−	−	−	−	−	−
F.spp.4287	2012	F. solani	Yorkshire	seed	−	−	−	−	−	−	−	−	−	−
F.spp.4288	2012	F. solani	Yorkshire	seed	−	−	−	−	−	−	−	−	−	−
F.spp.4289	2012	F. solani	Yorkshire	seed	−	−	−	−	−	−	−	−	−	−
F.spp.4290	2012	F. solani	Yorkshire	seed	−	−	−	−	−	−	−	−	−	−
F.spp.4291	2012	F. solani	Yorkshire	seed	−	−	−	−	−	−	−	−	−	−
F.spp.4292	2012	F. solani	Yorkshire	seed	−	−	−	−	−	−	−	−	−	−
F.spp.4293	2012	F. solani	Yorkshire	seed	−	−	−	−	−	−	−	−	−	−
F.spp.4294	2012	F. solani	Yorkshire	stalk	−	−	−	−	−	−	−	−	−	−
F.spp.4295	2012	F. solani	Yorkshire	stalk	−	−	−	−	−	−	−	−	−	−
F.spp.4296	2012	F. solani	Yorkshire	stalk	−	−	−	−	−	−	−	−	−	−
F.spp.4297	2012	F. solani	Yorkshire	stalk	−	−	−	−	−	−	−	−	−	−
F.spp.4298	2012	F. solani	Yorkshire	stalk	−	−	−	−	−	−	−	−	−	−
F.spp.4299	2012	F. solani	Yorkshire	stalk	−	−	−	−	−	−	−	−	−	−
F.spp.4300	2012	F. solani	Yorkshire	stalk	−	−	−	−	−	−	−	−	−	−
F.spp.4301	2012	F. solani	Yorkshire	stalk	−	−	−	−	−	−	−	−	−	−
F.spp.4302	2012	F. solani	Yorkshire	stalk	−	−	−	−	−	−	−	−	−	−
F.spp.4303	2012	F. solani	Yorkshire	stalk	−	−	−	−	−	−	−	−	−	−
F.spp.4304	2012	F. solani	Yorkshire	stalk	−	−	−	−	−	−	−	−	−	−
F.spp.4305	2012	F. solani	Yorkshire	stalk	−	−	−	−	−	−	−	−	−	−
F.spp.4306	2012	F. solani	Yorkshire	stalk	−	−	−	−	−	−	−	−	−	−
F.spp.4307	2012	F. solani	Yorkshire	stalk	−	−	−	−	−	−	−	−	−	−
F.spp.4308	2012	F. solani	Yorkshire	stalk	−	−	−	−	−	−	−	−	−	−
F.spp.4309	2012	F. solani	Yorkshire	stalk	−	−	−	−	−	−	−	−	−	−
F.spp.4310	2012	F. cerealis	Shropshire	stalk	−	−	X	−	−	−	−	−	−	−
F.spp.4311	2012	F. solani	Shropshire	seed	−	−	−	−	−	−	−	−	−	−
F.spp.4312	2012	F. solani	Shropshire	seed	−	−	−	−	−	−	−	−	−	−
F.spp.4313	2012	F. solani	Shropshire	seed	−	−	−	−	−	−	−	−	−	−
F.spp.4314	2012	F. solani	Shropshire	seed	−	−	−	−	−	−	−	−	−	−
F.spp.4315	2012	F. solani	Shropshire	seed	−	−	−	−	−	−	−	−	−	−
F.spp.4316	2012	F. solani	Shropshire	seed	−	−	−	−	−	−	−	−	−	−
F.spp.4317	2012	F. solani	Shropshire	seed	−	−	−	−	−	−	−	−	−	−
F.spp.4318	2012	F. solani	Shropshire	seed	−	−	−	−	−	−	−	−	−	−
F.spp.4319	2012	F. solani	Shropshire	seed	−	−	−	−	−	−	−	−	−	−
F.spp.4320	2012	F. solani	Shropshire	seed	−	−	−	−	−	−	−	−	−	−
F.spp.4321	2012	F. solani	Shropshire	seed	−	−	−	−	−	−	−	−	−	−
F.spp.4322	2012	F. solani	Shropshire	seed	−	−	−	−	−	−	−	−	−	−
F.spp.4323	2012	F. solani	Shropshire	seed	−	−	−	−	−	−	−	−	−	−
F.spp.4324	2012	F. solani	Shropshire	seed	−	−	−	−	−	−	−	−	−	−
F.spp.4325	2012	F. solani	Shropshire	seed	−	−	−	−	−	−	−	−	−	−
F.spp.4326	2012	F. solani	Shropshire	seed	−	−	−	−	−	−	−	−	−	−
F.spp.4327	2012	F. solani	Shropshire	seed	−	−	−	−	−	−	−	−	−	−
F.spp.4328	2012	F. solani	Shropshire	seed	−	−	−	−	−	−	−	−	−	−
F.spp.4329	2012	F. solani	Shropshire	seed	−	−	−	−	−	−	−	−	−	−
F.spp.4330	2012	F. solani	Shropshire	seed	−	−	−	−	−	−	−	−	−	−
F.spp.4331	2012	F. solani	Shropshire	seed	−	−	−	−	−	−	−	−	−	−
F.spp.4332	2012	F. solani	Shropshire	seed	−	−	−	−	−	−	−	−	−	−
F.spp.4333	2012	F. solani	Shropshire	seed	−	−	−	−	−	−	−	−	−	−
F.spp.4334	2012	F. solani	Shropshire	seed	−	−	−	−	−	−	−	−	−	−
F.spp.4335	2012	F. solani	Shropshire	seed	−	−	−	−	−	−	−	−	−	−
F.spp.4336	2012	F. solani	Shropshire	seed	−	−	−	−	−	−	−	−	−	−
F.spp.4337	2012	F. solani	Shropshire	seed	−	−	−	−	−	−	−	−	−	−
F.spp.4338	2012	F. solani	Shropshire	seed	−	−	−	−	−	−	−	−	−	−
F.spp.4339	2012	F. solani	Shropshire	seed	−	−	−	−	−	−	−	−	−	−
F.spp.4340	2012	F. solani	Shropshire	seed	−	−	−	−	−	−	−	−	−	−
F.spp.4341	2012	F. solani	Shropshire	stalk	−	−	−	−	−	−	−	−	−	−
F.spp.4342	2012	F. solani	Shropshire	stalk	−	−	−	−	−	−	−	−	−	−
F.spp.4343	2012	F. solani	Shropshire	stalk	−	−	−	−	−	−	−	−	−	−
F.spp.4344	2012	F. solani	Shropshire	stalk	−	−	−	−	−	−	−	−	−	−
F.spp.4345	2012	F. solani	Shropshire	stalk	−	−	−	−	−	−	−	−	−	−
F.spp.4346	2012	F. solani	Shropshire	stalk	−	−	−	−	−	−	−	−	−	−
F.spp.4347	2012	F. solani	Shropshire	stalk	−	−	−	−	−	−	−	−	−	−
F.spp.4348	2012	F. solani	Shropshire	stalk	−	−	−	−	−	−	−	−	−	−
F.spp.4349	2012	F. solani	Shropshire	stalk	−	−	−	−	−	−	−	−	−	−
F.spp.4350	2012	F. solani	Shropshire	stalk	−	−	−	−	−	−	−	−	−	−
F.spp.4351	2012	F. solani	Shropshire	stalk	−	−	−	−	−	−	−	−	−	−
F.spp.4352	2012	F. solani	Shropshire	stalk	−	−	−	−	−	−	−	−	−	−
F.spp.4353	2012	F. solani	Shropshire	stalk	−	−	−	−	−	−	−	−	−	−
F.spp.4354	2012	F. solani	Shropshire	stalk	−	−	−	−	−	−	−	−	−	−
F.spp.4355	2012	F. solani	Shropshire	stalk	−	−	−	−	−	−	−	−	−	−
F.spp.4356	2012	F. solani	Shropshire	stalk	−	−	−	−	−	−	−	−	−	−
F.spp.4357	2012	F. solani	Shropshire	stalk	−	−	−	−	−	−	−	−	−	−
F.spp.4358	2012	F. solani	Shropshire	stalk	−	−	−	−	−	−	−	−	−	−
F.spp.4359	2012	F. solani	Shropshire	stalk	−	−	−	−	−	−	−	−	−	−
F.spp.4360	2012	F. solani	Shropshire	stalk	−	−	−	−	−	−	−	−	−	−
F.spp.4361	2012	F. solani	Shropshire	stalk	−	−	−	−	−	−	−	−	−	−
F.spp.4362	2012	F. solani	Shropshire	stalk	−	−	−	−	−	−	−	−	−	−
F.spp.4363	2012	F. solani	Shropshire	stalk	−	−	−	−	−	−	−	−	−	−
F.spp.4364	2012	F. solani	Shropshire	stalk	−	−	−	−	−	−	−	−	−	−
F.spp.4365	2012	F. solani	Shropshire	stalk	−	−	−	−	−	−	−	−	−	−
F.spp.4366	2012	F. solani	Shropshire	stalk	−	−	−	−	−	−	−	−	−	−
F.spp.4367	2012	F. solani	Shropshire	stalk	−	−	−	−	−	−	−	−	−	−
F.spp.4368	2012	F. solani	Shropshire	stalk	−	−	−	−	−	−	−	−	−	−
F.spp.4369	2012	F. solani	Shropshire	stalk	−	−	−	−	−	−	−	−	−	−
F.spp.4370	2012	F. solani	Shropshire	stalk	−	−	−	−	−	−	−	−	−	−
F.spp.4371	2012	F. solani	Shropshire	stalk	−	−	−	−	−	−	−	−	−	−
F.spp.4372	2012	F. solani	Shropshire	stalk	−	−	−	−	−	−	−	−	−	−
F.spp.4373	2012	F. solani	Shropshire	stalk	−	−	−	−	−	−	−	−	−	−
F.spp.4374	2012	F. solani	Shropshire	stalk	−	−	−	−	−	−	−	−	−	−
F.spp.4375	2012	F. solani	Shropshire	stalk	−	−	−	−	−	−	−	−	−	−
F.spp.4376	2012	F. solani	Shropshire	stalk	−	−	−	−	−	−	−	−	−	−
F.spp.4377	2012	F. solani	Kent	seed	−	−	−	−	−	−	−	−	−	−
F.spp.4378	2012	F. solani	Kent	seed	−	−	−	−	−	−	−	−	−	−
F.spp.4379	2012	F. solani	Kent	seed	−	−	−	−	−	−	−	−	−	−
F.spp.4380	2012	F. solani	Kent	seed	−	−	−	−	−	−	−	−	−	−
F.spp.4381	2012	F. solani	Kent	stalk	−	−	−	−	−	−	−	−	−	−
F.spp.4382	2012	F. solani	Kent	stalk	−	−	−	−	−	−	−	−	−	−
F.spp.4383	2012	F. solani	Kent	stalk	−	−	−	−	−	−	−	−	−	−
F.spp.4384	2012	F. solani	Kent	stalk	−	−	−	−	−	−	−	−	−	−
F.spp.4385	2012	F. solani	Kent	stalk	−	−	−	−	−	−	−	−	−	−
F.spp.4386	2012	F. solani	Kent	stalk	−	−	−	−	−	−	−	−	−	−
F.spp.4387	2012	F. solani	Kent	stalk	−	−	−	−	−	−	−	−	−	−
F.spp.4388	2012	F. solani	Kent	stalk	−	−	−	−	−	−	−	−	−	−
F.spp.4389	2012	F. solani	Kent	stalk	−	−	−	−	−	−	−	−	−	−
F.spp.4390	2012	F. solani	Kent	stalk	−	−	−	−	−	−	−	−	−	−
F.spp.4391	2012	F. solani	Kent	stalk	−	−	−	−	−	−	−	−	−	−
F.spp.4392	2012	F. solani	Kent	stalk	−	−	−	−	−	−	−	−	−	−
F.spp.4393	2012	F. solani	Kent	stalk	−	−	−	−	−	−	−	−	−	−
F.spp.4394	2012	F. solani	Kent	stalk	−	−	−	−	−	−	−	−	−	−
F.spp.4395	2012	F. solani	Kent	stalk	−	−	−	−	−	−	−	−	−	−
F.spp.4396	2012	F. solani	Kent	stalk	−	−	−	−	−	−	−	−	−	−
F.spp.4397	2012	F. solani	Kent	stalk	−	−	−	−	−	−	−	−	−	−
F.spp.4398	2012	F. solani	Kent	stalk	−	−	−	−	−	−	−	−	−	−
F.spp.4399	2012	F. solani	Kent	stalk	−	−	−	−	−	−	−	−	−	−
F.spp.4400	2012	F. solani	Kent	stalk	−	−	−	−	−	−	−	−	−	−
F.spp.4401	2012	F. solani	Kent	stalk	−	−	−	−	−	−	−	−	−	−
F.spp.4402	2012	F. solani	Kent	stalk	−	−	−	−	−	−	−	−	−	−
F.spp.4403	2012	F. solani	Kent	stalk	−	−	−	−	−	−	−	−	−	−
F.spp.4404	2012	F. solani	Kent	stalk	−	−	−	−	−	−	−	−	−	−
F.spp.4405	2012	F. cerealis	Devon	stalk	−	−	X	−	−	−	−	−	−	−
F.spp.4406	2012	F. cerealis	Devon	stalk	−	−	X	−	−	−	−	−	−	−
F.spp.4407	2012	F. proliferatrum	Devon	stalk	−	−	−	−	−	−	−	X	−	−
F.spp.4408	2012	F. solani	Devon	stalk	−	−	−	−	−	−	−	−	−	−
F.spp.4409	2012	F. solani	Devon	stalk	−	−	−	−	−	−	−	−	−	−
F.spp.4410	2012	F. solani	Devon	stalk	−	−	−	−	−	−	−	−	−	−
F.spp.4411	2012	F. solani	Devon	stalk	−	−	−	−	−	−	−	−	−	−
F.spp.4412	2012	F. solani	Devon	stalk	−	−	−	−	−	−	−	−	−	−
F.spp.4413	2012	F. solani	Devon	stalk	−	−	−	−	−	−	−	−	−	−
F.spp.4414	2012	F. solani	Devon	stalk	−	−	−	−	−	−	−	−	−	−
F.spp.4415	2012	F. solani	Devon	stalk	−	−	−	−	−	−	−	−	−	−
F.spp.4416	2012	F. solani	Devon	stalk	−	−	−	−	−	−	−	−	−	−
F.spp.4417	2012	F. solani	Devon	stalk	−	−	−	−	−	−	−	−	−	−
F.spp.4418	2012	F. solani	Devon	stalk	−	−	−	−	−	−	−	−	−	−
F.spp.4419	2012	F. solani	Devon	stalk	−	−	−	−	−	−	−	−	−	−
F.spp.4420	2012	F. solani	Devon	stalk	−	−	−	−	−	−	−	−	−	−
F.spp.4421	2012	F. solani	Devon	stalk	−	−	−	−	−	−	−	−	−	−
F.spp.4422	2012	F. solani	Devon	stalk	−	−	−	−	−	−	−	−	−	−
F.spp.4423	2012	F. solani	Devon	stalk	−	−	−	−	−	−	−	−	−	−
F.spp.4424	2012	F. solani	Devon	stalk	−	−	−	−	−	−	−	−	−	−
F.spp.4425	2012	F. solani	Devon	stalk	−	−	−	−	−	−	−	−	−	−
F.spp.4426	2012	F. solani	Devon	stalk	−	−	−	−	−	−	−	−	−	−
F.spp.4427	2012	F. solani	Devon	stalk	−	−	−	−	−	−	−	−	−	−
F.spp.4428	2012	F. solani	Devon	stalk	−	−	−	−	−	−	−	−	−	−
F.spp.4429	2012	F. solani	Devon	stalk	−	−	−	−	−	−	−	−	−	−
F.spp.4430	2012	F. solani	Devon	stalk	−	−	−	−	−	−	−	−	−	−
F.spp.4431	2012	F. solani	Devon	stalk	−	−	−	−	−	−	−	−	−	−
F.spp.4432	2012	F. solani	Devon	stalk	−	−	−	−	−	−	−	−	−	−
F.spp.4433	2012	F. solani	Devon	stalk	−	−	−	−	−	−	−	−	−	−
F.spp.4434	2012	F. solani	Devon	stalk	−	−	−	−	−	−	−	−	−	−
F.spp.4435	2012	F. solani	Devon	stalk	−	−	−	−	−	−	−	−	−	−
F.spp.4436	2012	F. solani	Devon	stalk	−	−	−	−	−	−	−	−	−	−
F.spp.4437	2012	F. avenaceum	Gloucestershire	seed	X	−	−	−	−	−	−	−	−	−
F.spp.4438	2012	F. avenaceum	Gloucestershire	stalk	X	−	−	−	−	−	−	−	−	−
F.spp.4439	2012	F. avenaceum	Gloucestershire	stalk	X	−	−	−	−	−	−	−	−	−
F.spp.4440	2012	F. avenaceum	Gloucestershire	stalk	X	−	−	−	−	−	−	−	−	−
F.spp.4441	2012	F. cerealis	Gloucestershire	seed	−	−	X	−	−	−	−	−	−	−
F.spp.4442	2012	F. equiseti	Gloucestershire	seed	−	−	−	X	−	−	−	−	−	−
F.spp.4443	2012	F. solani	Gloucestershire	seed	−	−	−	−	−	−	−	−	−	−
F.spp.4444	2012	F. solani	Gloucestershire	seed	−	−	−	−	−	−	−	−	−	−
F.spp.4445	2012	F. solani	Gloucestershire	seed	−	−	−	−	−	−	−	−	−	−
F.spp.4446	2012	F. solani	Gloucestershire	seed	−	−	−	−	−	−	−	−	−	−
F.spp.4447	2012	F. solani	Gloucestershire	seed	−	−	−	−	−	−	−	−	−	−
F.spp.4448	2012	F. solani	Gloucestershire	stalk	−	−	−	−	−	−	−	−	−	−
F.spp.4449	2012	F. solani	Gloucestershire	stalk	−	−	−	−	−	−	−	−	−	−
F.spp.4450	2012	F. solani	Gloucestershire	stalk	−	−	−	−	−	−	−	−	−	−
F.spp.4451	2012	F. solani	Gloucestershire	stalk	−	−	−	−	−	−	−	−	−	−
F.spp.4452	2012	F. solani	Gloucestershire	stalk	−	−	−	−	−	−	−	−	−	−
F.spp.4453	2012	F. solani	Gloucestershire	stalk	−	−	−	−	−	−	−	−	−	−
F.spp.4454	2012	F. solani	Gloucestershire	stalk	−	−	−	−	−	−	−	−	−	−
F.spp.4455	2012	F. solani	Gloucestershire	stalk	−	−	−	−	−	−	−	−	−	−
F.spp.4456	2012	F. solani	Gloucestershire	stalk	−	−	−	−	−	−	−	−	−	−
F.spp.4457	2012	F. solani	Gloucestershire	stalk	−	−	−	−	−	−	−	−	−	−
F.spp.4458	2012	F. solani	Gloucestershire	stalk	−	−	−	−	−	−	−	−	−	−
F.spp.4459	2012	F. solani	Gloucestershire	stalk	−	−	−	−	−	−	−	−	−	−
F.spp.4460	2012	F. solani	Gloucestershire	stalk	−	−	−	−	−	−	−	−	−	−
F.spp.4461	2012	F. solani	Gloucestershire	stalk	−	−	−	−	−	−	−	−	−	−
F.spp.4462	2012	F. solani	Gloucestershire	stalk	−	−	−	−	−	−	−	−	−	−
F.spp.4463	2012	F. solani	Gloucestershire	stalk	−	−	−	−	−	−	−	−	−	−
F.spp.4464	2012	F. solani	Gloucestershire	stalk	−	−	−	−	−	−	−	−	−	−
F.spp.4465	2012	F. solani	Gloucestershire	stalk	−	−	−	−	−	−	−	−	−	−

## Sheet: Fc TCT genotype
Fungal ID	Year	species	Location	seed/Stalk	F. spp Assay	Tri3 -7 (15AcDON)	Tri3 -7 (3AcDON)	Tri3 -7 (NIV)	Tri12 (15AcDON)	Tri12 (3AcDON)	Tri12 (NIV)
F.spp.1000	2011	F. culmorum	Yorkshire	stalk	Fc01 F/R	−	−	X	−	−	X
F.spp.1023	2011	F. culmorum	Shropshire	stalk	Fc01 F/R	−	−	X	−	−	X
F.spp.1026	2011	F. culmorum	Yorkshire	stalk	Fc01 F/R	−	X	−	−	X	−
F.spp.1037	2011	F. culmorum	Yorkshire	stalk	Fc01 F/R	−	−	X	−	−	X
F.spp.1038	2011	F. culmorum	Shropshire	seed	Fc01 F/R	−	−	X	−	−	X
F.spp.1041	2011	F. culmorum	Oxfordshire	seed	Fc01 F/R	−	X	−	−	X	−
F.spp.1042	2011	F. culmorum	Shropshire	seed	Fc01 F/R	−	X	−	−	X	−
F.spp.1043	2011	F. culmorum	Gloucestershire	seed	Fc01 F/R	−	−	X	−	−	X
F.spp.1044	2011	F. culmorum	Shropshire	seed	Fc01 F/R	−	−	X	−	−	X
F.spp.1054	2011	F. culmorum	Shropshire	stalk	Fc01 F/R	−	−	X	−	−	X
F.spp.1060	2011	F. culmorum	Yorkshire	stalk	Fc01 F/R	−	−	X	−	−	X
F.spp.1066	2011	F. culmorum	Shropshire	stalk	Fc01 F/R	−	−	X	−	−	X
F.spp.1070	2011	F. culmorum	Shropshire	stalk	Fc01 F/R	−	−	X	−	−	X
F.spp.1073	2011	F. culmorum	Oxfordshire	stalk	Fc01 F/R	−	X	−	−	X	−
F.spp.1077	2011	F. culmorum	Herefordshire	stalk	Fc01 F/R	−	−	X	−	−	X
F.spp.1080	2011	F. culmorum	Herefordshire	stalk	Fc01 F/R	−	X	−	−	X	−
F.spp.1083	2011	F. culmorum	Yorkshire	stalk	Fc01 F/R	−	X	−	−	X	−
F.spp.1086	2011	F. culmorum	Oxfordshire	stalk	Fc01 F/R	−	−	X	−	−	X
F.spp.1091	2011	F. culmorum	Oxfordshire	stalk	Fc01 F/R	−	X	−	−	X	−
F.spp.1094	2011	F. culmorum	Shropshire	stalk	Fc01 F/R	−	−	X	−	−	X
F.spp.1096	2011	F. culmorum	Oxfordshire	stalk	Fc01 F/R	−	X	−	−	X	−
F.spp.1102	2011	F. culmorum	Shropshire	stalk	Fc01 F/R	−	−	X	−	−	X
F.spp.1103	2011	F. culmorum	Herefordshire	stalk	Fc01 F/R	−	−	X	−	−	X
F.spp.1108	2011	F. culmorum	Oxfordshire	stalk	Fc01 F/R	−	−	X	−	−	X
F.spp.1132	2011	F. culmorum	Yorkshire	stalk	Fc01 F/R	−	X	−	−	X	−
F.spp.1133	2011	F. culmorum	Oxfordshire	stalk	Fc01 F/R	−	−	X	−	−	X
F.spp.1144	2011	F. culmorum	Yorkshire	stalk	Fc01 F/R	−	−	X	−	−	X
F.spp.1151	2011	F. culmorum	Herefordshire	stalk	Fc01 F/R	−	−	X	−	−	X
F.spp.1157	2011	F. culmorum	Shropshire	stalk	Fc01 F/R	−	−	X	−	−	X
F.spp.1167	2011	F. culmorum	Herefordshire	stalk	Fc01 F/R	−	−	X	−	−	X
F.spp.1174	2011	F. culmorum	Shropshire	seed	Fc01 F/R	−	−	X	−	−	X
F.spp.1177	2011	F. culmorum	Shropshire	seed	Fc01 F/R	−	−	X	−	−	X
F.spp.1179	2011	F. culmorum	Yorkshire	seed	Fc01 F/R	−	−	X	−	−	X
F.spp.1182	2011	F. culmorum	Yorkshire	seed	Fc01 F/R
F.spp.1192	2011	F. culmorum	Shropshire	seed	Fc01 F/R	−	−	X	−	−	X
F.spp.1198	2011	F. culmorum	Shropshire	seed	Fc01 F/R	−	X	−	−	X	−
F.spp.1206	2011	F. culmorum	Shropshire	seed	Fc01 F/R	−	−	X	−	−	X
F.spp.1207	2011	F. culmorum	Shropshire	seed	Fc01 F/R	−	−	X	−	−	X
F.spp.1236	2011	F. culmorum	Shropshire	seed	Fc01 F/R	−	−	X	−	−	X
F.spp.1251	2011	F. culmorum	Yorkshire	seed	Fc01 F/R	−	X	−	−	X	−
F.spp.1252	2011	F. culmorum	Oxfordshire	seed	Fc01 F/R	−	X	−	−	X	−
F.spp.1268	2011	F. culmorum	Shropshire	seed	Fc01 F/R	−	−	X	−	−	X
F.spp.1272	2011	F. culmorum	Shropshire	seed	Fc01 F/R	−	−	X	−	−	X
F.spp.1290	2011	F. culmorum	Yorkshire	seed	Fc01 F/R	−	−	X	−	−	X
F.spp.1318	2011	F. culmorum	Shropshire	seed	Fc01 F/R	−	−	X	−	−	X
F.spp.1326	2011	F. culmorum	Shropshire	stalk	Fc01 F/R	−	−	X	−	−	X
F.spp.1331	2011	F. culmorum	Shropshire	stalk	Fc01 F/R	−	−	X	−	−	X
F.spp.1342	2011	F. culmorum	Herefordshire	stalk	Fc01 F/R	−	−	X	−	−	X
F.spp.1352	2011	F. culmorum	Devon	stalk	Fc01 F/R	−	−	X	−	−	X
F.spp.1353	2011	F. culmorum	Shropshire	stalk	Fc01 F/R	−	−	X	−	−	X
F.spp.1354	2011	F. culmorum	Herefordshire	stalk	Fc01 F/R	X	−	−	X	−	−
F.spp.1358	2011	F. culmorum	Devon	stalk	Fc01 F/R	−	−	X	−	−	X
F.spp.1359	2011	F. culmorum	Herefordshire	stalk	Fc01 F/R	−	−	X	−	−	X
F.spp.1363	2011	F. culmorum	Oxfordshire	stalk	Fc01 F/R	−	−	X	−	−	X
F.spp.1367	2011	F. culmorum	Oxfordshire	stalk	Fc01 F/R	−	X	−	−	X	−
F.spp.1370	2011	F. culmorum	Shropshire	stalk	Fc01 F/R	−	−	X	−	−	X
F.spp.1373	2011	F. culmorum	Sussex	stalk	Fc01 F/R	−	X	−	−	X	−
F.spp.1382	2011	F. culmorum	Shropshire	stalk	Fc01 F/R	−	−	X	−	−	X
F.spp.1383	2011	F. culmorum	Shropshire	stalk	Fc01 F/R	−	X	−	−	X	−
F.spp.1386	2011	F. culmorum	Somerset	stalk	Fc01 F/R	−	X	−	−	X	−
F.spp.1393	2011	F. culmorum	Sussex	stalk	Fc01 F/R	−	−	X	−	−	X
F.spp.1400	2011	F. culmorum	Oxfordshire	stalk	Fc01 F/R	−	−	X	−	−	X
F.spp.1405	2011	F. culmorum	Devon	stalk	Fc01 F/R	−	X	−	−	X	−
F.spp.1411	2011	F. culmorum	Somerset	stalk	Fc01 F/R	−	−	X	−	−	X
F.spp.1414	2011	F. culmorum	Oxfordshire	stalk	Fc01 F/R	−	X	−	−	X	−
F.spp.1416	2011	F. culmorum	Shropshire	stalk	Fc01 F/R	−	−	X	−	−	X
F.spp.1417	2011	F. culmorum	Shropshire	stalk	Fc01 F/R	−	−	X	−	−	X
F.spp.1419	2011	F. culmorum	Devon	stalk	Fc01 F/R	−	X	−	−	X	−
F.spp.1422	2011	F. culmorum	Shropshire	stalk	Fc01 F/R	−	−	X	−	−	X
F.spp.1427	2011	F. culmorum	Shropshire	stalk	Fc01 F/R	−	−	X	−	−	X
F.spp.1428	2011	F. culmorum	Shropshire	stalk	Fc01 F/R	−	X	−	−	X	−
F.spp.1434	2011	F. culmorum	Herefordshire	stalk	Fc01 F/R	−	−	X	−	−	X
F.spp.1437	2011	F. culmorum	Herefordshire	stalk	Fc01 F/R	−	−	X	−	−	X
F.spp.1439	2011	F. culmorum	Herefordshire	stalk	Fc01 F/R	−	−	X	−	−	X
F.spp.1441	2011	F. culmorum	Shropshire	stalk	Fc01 F/R	−	−	X	−	−	X
F.spp.1443	2011	F. culmorum	Shropshire	stalk	Fc01 F/R	−	−	X	−	−	X
F.spp.1449	2011	F. culmorum	Herefordshire	stalk	Fc01 F/R	−	−	X	−	−	X
F.spp.1458	2011	F. culmorum	Shropshire	stalk	Fc01 F/R	−	−	X	−	−	X
F.spp.1460	2011	F. culmorum	Somerset	stalk	Fc01 F/R	−	−	X	−	−	X
F.spp.1464	2011	F. culmorum	Herefordshire	stalk	Fc01 F/R	−	−	X	−	−	X
F.spp.1469	2011	F. culmorum	Devon	stalk	Fc01 F/R	−	−	X	−	−	X
F.spp.1473	2011	F. culmorum	Herefordshire	stalk	Fc01 F/R	−	−	X	−	−	X
F.spp.1474	2011	F. culmorum	Herefordshire	stalk	Fc01 F/R	−	−	X	−	−	X
F.spp.1479	2011	F. culmorum	Somerset	stalk	Fc01 F/R	−	X	−	−	X	−
F.spp.1481	2011	F. culmorum	Oxfordshire	stalk	Fc01 F/R	−	−	X	−	−	X
F.spp.1499	2011	F. culmorum	Oxfordshire	stalk	Fc01 F/R	−	−	X	−	−	X
F.spp.1503	2011	F. culmorum	Oxfordshire	stalk	Fc01 F/R	−	−	X	−	−	X
F.spp.1511	2011	F. culmorum	Herefordshire	stalk	Fc01 F/R	−	−	X	−	−	X
F.spp.1516	2011	F. culmorum	Oxfordshire	seed	Fc01 F/R	X	−	−	X	−	−
F.spp.1522	2011	F. culmorum	Somerset	stalk	Fc01 F/R	−	X	−	−	X	−
F.spp.1526	2011	F. culmorum	Shropshire	stalk	Fc01 F/R	−	−	X	−	−	X
F.spp.1531	2011	F. culmorum	Shropshire	stalk	Fc01 F/R	−	−	X	−	−	X
F.spp.1536	2011	F. culmorum	Somerset	stalk	Fc01 F/R	−	X	−	−	X	−
F.spp.1537	2011	F. culmorum	Shropshire	stalk	Fc01 F/R	−	−	X	−	−	X
F.spp.1545	2011	F. culmorum	Shropshire	stalk	Fc01 F/R	−	−	X	−	−	X
F.spp.1546	2011	F. culmorum	Oxfordshire	stalk	Fc01 F/R	−	X	−	−	X	−
F.spp.1554	2011	F. culmorum	Sussex	stalk	Fc01 F/R	−	−	X	−	−	X
F.spp.1562	2011	F. culmorum	Somerset	stalk	Fc01 F/R	−	−	X	−	−	X
F.spp.1568	2011	F. culmorum	Somerset	seed	Fc01 F/R	−	X	−	−	X	−
F.spp.1573	2011	F. culmorum	Somerset	seed	Fc01 F/R	−	X	−	−	X	−
F.spp.1577	2011	F. culmorum	Somerset	stalk	Fc01 F/R	−	−	X	−	−	X
F.spp.1579	2011	F. culmorum	Devon	stalk	Fc01 F/R	−	−	X	−	−	X
F.spp.1580	2011	F. culmorum	Herefordshire	stalk	Fc01 F/R	−	X	−	−	X	−
F.spp.1584	2011	F. culmorum	Shropshire	stalk	Fc01 F/R	−	−	X	−	−	X
F.spp.1592	2011	F. culmorum	Sussex	stalk	Fc01 F/R	−	−	X	−	−	X
F.spp.1603	2011	F. culmorum	Sussex	stalk	Fc01 F/R	−	X	−	−	X	−
F.spp.1624	2011	F. culmorum	Sussex	stalk	Fc01 F/R	−	X	−	−	X	−
F.spp.1626	2011	F. culmorum	Devon	stalk	Fc01 F/R	−	−	X	−	−	X
F.spp.1628	2011	F. culmorum	Herefordshire	stalk	Fc01 F/R	−	−	X	−	−	X
F.spp.1633	2011	F. culmorum	Devon	stalk	Fc01 F/R	−	−	X	−	−	X
F.spp.1637	2011	F. culmorum	Devon	stalk	Fc01 F/R	−	−	X	−	−	X
F.spp.1648	2011	F. culmorum	Devon	stalk	Fc01 F/R	−	−	X	−	−	X
F.spp.1649	2011	F. culmorum	Somerset	stalk	Fc01 F/R	−	−	X	−	−	X
F.spp.1652	2011	F. culmorum	Somerset	stalk	Fc01 F/R	−	X	−	−	X	−
F.spp.1655	2011	F. culmorum	Somerset	stalk	Fc01 F/R	−	X	−	−	X	−
F.spp.1669	2011	F. culmorum	Shropshire	seed	Fc01 F/R	−	X	−	−	X	−
F.spp.1674	2011	F. culmorum	Shropshire	seed	Fc01 F/R	−	−	X	−	−	X
F.spp.1686	2011	F. culmorum	Herefordshire	seed	Fc01 F/R	−	−	X	−	−	X
F.spp.1688	2011	F. culmorum	Herefordshire	seed	Fc01 F/R	−	−	X	−	−	X
F.spp.1697	2011	F. culmorum	Shropshire	seed	Fc01 F/R	−	−	X	−	−	X
F.spp.1703	2011	F. culmorum	Herefordshire	seed	Fc01 F/R	−	−	X	−	−	X
F.spp.1713	2011	F. culmorum	Sussex	seed	Fc01 F/R	−	−	X	−	−	X
F.spp.1715	2011	F. culmorum	Shropshire	seed	Fc01 F/R	−	−	X	−	−	X
F.spp.1717	2011	F. culmorum	Shropshire	seed	Fc01 F/R	−	−	X	−	−	X
F.spp.1721	2011	F. culmorum	Sussex	seed	Fc01 F/R	−	−	X	−	−	X
F.spp.1724	2011	F. culmorum	Herefordshire	seed	Fc01 F/R	−	−	X	−	−	X
F.spp.1750	2011	F. culmorum	Sussex	seed	Fc01 F/R	−	−	X	−	−	X
F.spp.1752	2011	F. culmorum	Shropshire	seed	Fc01 F/R	−	−	X	−	−	X
F.spp.1769	2011	F. culmorum	Herefordshire	seed	Fc01 F/R	−	−	X	−	−	X
F.spp.1781	2011	F. culmorum	Shropshire	seed	Data n/a	−	−	X	−	−	X
F.spp.1783	2011	F. culmorum	Devon	seed	Fc01 F/R	−	X	−	−	X	−
F.spp.1784	2011	F. culmorum	Shropshire	seed	Fc01 F/R	−	−	X	−	−	X
F.spp.1785	2011	F. culmorum	Oxfordshire	seed	Fc01 F/R	−	X	−	−	X	−
F.spp.1788	2011	F. culmorum	Shropshire	seed	Fc01 F/R	−	−	X	−	−	X
F.spp.1789	2011	F. culmorum	Shropshire	seed	Fc01 F/R	−	−	X	−	−	X
F.spp.1797	2011	F. culmorum	Herefordshire	seed	Data n/a	−	−	X	−	−	X
F.spp.1804	2011	F. culmorum	Herefordshire	seed	Data n/a	−	−	X	−	−	X
F.spp.1819	2011	F. culmorum	Sussex	seed	Data n/a	−	X	−	−	X	−
F.spp.1826	2011	F. culmorum	Shropshire	seed	Data n/a	−	−	X	−	−	X
F.spp.1828	2011	F. culmorum	Oxfordshire	seed	Data n/a	−	−	X	−	−	X
F.spp.1840	2011	F. culmorum	Shropshire	seed	Fc01 F/R	−	−	X	−	−	X
F.spp.1843	2011	F. culmorum	Devon	seed	Data n/a	−	−	X	−	−	X
F.spp.1847	2011	F. culmorum	Sussex	seed	Data n/a	−	−	X	−	−	X
F.spp.1873	2011	F. culmorum	Herefordshire	stalk	Data n/a	−	−	X	−	−	X
F.spp.1886	2011	F. culmorum	Nottinghamshire	stalk	Data n/a	−	−	X	−	−	X
F.spp.1889	2011	F. culmorum	Nottinghamshire	stalk	Data n/a	−	X	−	−	X	−
F.spp.1891	2011	F. culmorum	Nottinghamshire	stalk	Fc01 F/R	−	X	−	−	X	−
F.spp.1908	2011	F. culmorum	Lincolnshire	stalk	Fc01 F/R	−	−	X	−	−	X
F.spp.1909	2011	F. culmorum	Herefordshire	stalk	Fc01 F/R	−	−	X	−	−	X
F.spp.1912	2011	F. culmorum	Shropshire	seed	Fc01 F/R	−	−	X	−	−	X
F.spp.1920	2011	F. culmorum	Nottinghamshire	stalk	Data n/a	−	X	−	−	X	−
F.spp.1924	2011	F. culmorum	Devon	seed	Data n/a	−	−	X	−	−	X
F.spp.1925	2011	F. culmorum	Sussex	seed	Data n/a	−	−	X	−	−	X
F.spp.1935	2011	F. culmorum	Nottinghamshire	stalk	Data n/a	−	−	X	−	−	X
F.spp.1936	2011	F. culmorum	Devon	stalk	Data n/a	−	−	X	−	−	X
F.spp.1937	2011	F. culmorum	Herefordshire	stalk	Fc01 F/R	−	−	X	−	−	X
F.spp.1939	2011	F. culmorum	Lincolnshire	stalk	Fc01 F/R	−	X	−	−	X	−
F.spp.1943	2011	F. culmorum	Devon	stalk	Fc01 F/R	−	−	X	−	−	X
F.spp.1944	2011	F. culmorum	Devon	stalk	Fc01 F/R	−	−	X	−	−	X
F.spp.1954	2011	F. culmorum	Somerset	stalk	Fc01 F/R	−	X	−	−	X	−
F.spp.1961	2011	F. culmorum	Nottinghamshire	stalk	Data n/a	−	−	X	−	−	X
F.spp.1970	2011	F. culmorum	Nottinghamshire	stalk	Data n/a	−	−	X	−	−	X
F.spp.1975	2011	F. culmorum	Nottinghamshire	stalk	Data n/a	−	−	X	−	−	X
F.spp.1978	2011	F. culmorum	Lincolnshire	stalk	Data n/a	−	−	X	−	−	X
F.spp.1980	2011	F. culmorum	Lincolnshire	stalk	Data n/a	−	−	X	−	−	X
F.spp.1981	2011	F. culmorum	Nottinghamshire	stalk	Data n/a	−	−	X	−	−	X
F.spp.1984	2011	F. culmorum	Nottinghamshire	stalk	Data n/a	−	−	X	−	−	X
F.spp.1986	2011	F. culmorum	Somerset	stalk	Data n/a	−	−	X	−	−	X
F.spp.1988	2011	F. culmorum	Somerset	stalk	Data n/a	−	−	X	−	−	X
F.spp.1998	2011	F. culmorum	Lincolnshire	stalk	Data n/a	−	−	X	−	−	X
F.spp.2006	2011	F. culmorum	Herefordshire	stalk	Data n/a	−	−	X	−	−	X
F.spp.2010	2011	F. culmorum	Devon	stalk	Fc01 F/R	−	−	X	−	−	X
F.spp.2012	2011	F. culmorum	Herefordshire	stalk	Data n/a	−	−	X	−	−	X
F.spp.2014	2011	F. culmorum	Somerset	stalk	Data n/a	−	−	X	−	−	X
F.spp.2016	2011	F. culmorum	Devon	stalk	Data n/a	−	−	X	−	−	X
F.spp.2019	2011	F. culmorum	Nottinghamshire	stalk	Data n/a	−	−	X	−	−	X
F.spp.2022	2011	F. culmorum	Herefordshire	stalk	Fc01 F/R	−	−	X	−	−	X
F.spp.2023	2011	F. culmorum	Herefordshire	stalk	Fc01 F/R	−	−	X	−	−	X
F.spp.2031	2011	F. culmorum	Herefordshire	seed	Fc01 F/R	−	−	X	−	−	X
F.spp.2054	2011	F. culmorum	Nottinghamshire	seed	Fc01 F/R	−	−	X	−	−	X
F.spp.2058	2011	F. culmorum	Sussex	seed	Fc01 F/R	−	X	−	−	X	−
F.spp.2059	2011	F. culmorum	Devon	seed	Fc01 F/R	−	X	−	−	X	−
F.spp.2060	2011	F. culmorum	Herefordshire	seed	Fc01 F/R	−	−	X	−	−	X
F.spp.2061	2011	F. culmorum	Lincolnshire	seed	Fc01 F/R	−	X	−	−	X	−
F.spp.2074	2011	F. culmorum	Devon	seed	Fc01 F/R	−	−	X	−	−	X
F.spp.2081	2011	F. culmorum	Lincolnshire	stalk	Data n/a	−	X	−	−	X	−
F.spp.2087	2011	F. culmorum	Devon	seed	Fc01 F/R	−	X	−	−	X	−
F.spp.2093	2011	F. culmorum	Herefordshire	stalk	Fc01 F/R	−	X	−	−	X	−
F.spp.2101	2011	F. culmorum	Nottinghamshire	stalk	Fc01 F/R	−	X	−	−	X	−
F.spp.2103	2011	F. culmorum	Lincolnshire	stalk	Data n/a	−	−	X	−	−	X
F.spp.2107	2011	F. culmorum	Herefordshire	stalk	Fc01 F/R	−	−	X	−	−	X
F.spp.2119	2011	F. culmorum	Lincolnshire	stalk	Data n/a	−	−	X	−	−	X
F.spp.2121	2011	F. culmorum	Nottinghamshire	stalk	Data n/a	−	−	X	−	−	X
F.spp.2125	2011	F. culmorum	Herefordshire	stalk	Data n/a	−	−	X	−	−	X
F.spp.2129	2011	F. culmorum	Nottinghamshire	stalk	Data n/a	−	−	X	−	−	X
F.spp.2135	2011	F. culmorum	Devon	stalk	Data n/a	−	−	X	−	−	X
F.spp.2137	2011	F. culmorum	Devon	stalk	Data n/a	−	−	X	−	−	X
F.spp.2138	2011	F. culmorum	Nottinghamshire	stalk	Data n/a	−	−	X	−	−	X
F.spp.2139	2011	F. culmorum	Lincolnshire	stalk	Data n/a	−	−	X	−	−	X
F.spp.2141	2011	F. culmorum	Lincolnshire	stalk	Data n/a	−	X	−	−	X	−
F.spp.2149	2011	F. culmorum	Somerset	stalk	Data n/a	−	−	X	−	−	X
F.spp.2150	2011	F. culmorum	Nottinghamshire	stalk	Data n/a	−	X	−	−	X	−
F.spp.2151	2011	F. culmorum	Devon	stalk	Data n/a	−	X	−	−	X	−
F.spp.2153	2011	F. culmorum	Herefordshire	stalk	Data n/a	−	−	X	−	−	X
F.spp.2157	2011	F. culmorum	Nottinghamshire	stalk	Data n/a	−	−	X	−	−	X
F.spp.2158	2011	F. culmorum	Nottinghamshire	stalk	Fc01 F/R	−	X	−	−	X	−
F.spp.2163	2011	F. culmorum	Lincolnshire	stalk	Fc01 F/R	−	X	−	−	X	−
F.spp.2164	2011	F. culmorum	Nottinghamshire	stalk	Fc01 F/R	−	X	−	−	X	−
F.spp.2179	2011	F. culmorum	Devon	stalk	Fc01 F/R	−	X	−	−	X	−
F.spp.2181	2011	F. culmorum	Nottinghamshire	stalk	Data n/a	−	X	−	−	X	−
F.spp.2186	2011	F. culmorum	Devon	stalk	Fc01 F/R	−	−	X	−	−	X
F.spp.2189	2011	F. culmorum	Lincolnshire	stalk	Fc01F/R	−	X	−	−	X	−
F.spp.2192	2011	F. culmorum	Lincolnshire	stalk	Data n/a	X	−	−	X	−	−
F.spp.2197	2011	F. culmorum	Nottinghamshire	stalk	Data n/a	−	−	X	−	−	X
F.spp.2204	2011	F. culmorum	Nottinghamshire	stalk	Data n/a	−	−	X	−	−	X
F.spp.2216	2011	F. culmorum	Nottinghamshire	stalk	Data n/a	−	−	X	−	−	X
F.spp.2219	2011	F. culmorum	Lincolnshire	stalk	Fc01 F/R	−	X	−	−	X	−
F.spp.2225	2011	F. culmorum	Herefordshire	seed	Fc01 F/R	−	−	X	−	−	X
F.spp.2227	2011	F. culmorum	Lincolnshire	stalk	Fc01 F/R	−	−	X	−	−	X
F.spp.2230	2011	F. culmorum	Lincolnshire	stalk	Data n/a	−	−	X	−	−	X
F.spp.2234	2011	F. culmorum	Lincolnshire	seed	Fc01 F/R	−	−	X	−	−	X
F.spp.2240	2011	F. culmorum	Nottinghamshire	seed	Fc01 F/R	−	−	X	−	−	X
F.spp.2242	2011	F. culmorum	Nottinghamshire	seed	Fc01 F/R	−	−	X	−	−	X
F.spp.2251	2011	F. culmorum	Lincolnshire	stalk	Fc01 F/R	−	−	X	−	−	X
F.spp.2253	2011	F. culmorum	Herefordshire	stalk	Data n/a	−	−	X	−	−	X
F.spp.2259	2011	F. culmorum	Nottinghamshire	seed	Data n/a	−	−	X	−	−	X
F.spp.2266	2011	F. culmorum	Nottinghamshire	seed	Data n/a	−	−	X	−	−	X
F.spp.2270	2011	F. culmorum	Nottinghamshire	seed	Fc01 F/R	−	−	X	−	−	X
F.spp.2276	2011	F. culmorum	Nottinghamshire	seed	Fc01 F/R	−	−	X	−	−	X
F.spp.2278	2011	F. culmorum	Nottinghamshire	seed	Fc01 F/R	−	−	X	−	−	X
F.spp.2289	2011	F. culmorum	Herefordshire	seed	Data n/a	−	−	X	−	−	X
F.spp.2297	2011	F. culmorum	Lincolnshire	seed	Fc01 F/R	−	−	X	−	−	X
F.spp.2306	2011	F. culmorum	Sussex	seed	Fc01 F/R	−	X	−	−	X	−
F.spp.2307	2011	F. culmorum	Devon	seed	Data n/a	−	−	X	−	−	X
F.spp.2314	2011	F. culmorum	Sussex	seed	Fc01 F/R	−	−	X	−	−	X
F.spp.2323	2011	F. culmorum	Lincolnshire	seed	Fc01 F/R	−	−	X	−	−	X
F.spp.2326	2011	F. culmorum	Sussex	seed	Fc01 F/R	−	−	X	−	−	X
F.spp.2330	2011	F. culmorum	Nottinghamshire	seed	Fc01 F/R	−	X	−	−	X	−
F.spp.2336	2011	F. culmorum	Sussex	seed	Data n/a	−	X	−	−	X	−
F.spp.2338	2011	F. culmorum	Sussex	seed	Fc01 F/R	−	−	X	−	−	X
F.spp.2340	2011	F. culmorum	Devon	seed	Data n/a	−	X	−	−	X	−
F.spp.2342	2011	F. culmorum	Lincolnshire	seed	Data n/a	−	X	−	−	X	−
F.spp.2345	2011	F. culmorum	Herefordshire	seed	Fc01 F/R	−	−	X	−	−	X
F.spp.2358	2011	F. culmorum	Lincolnshire	seed	Data n/a	−	−	X	−	−	X
F.spp.2364	2011	F. culmorum	Devon	seed	Data n/a	−	X	−	−	X	−
F.spp.2376	2011	F. culmorum	Herefordshire	seed	Fc01 F/R	−	X	−	−	X	−
F.spp.2382	2011	F. culmorum	Herefordshire	seed	Fc01 F/R	−	X	−	−	X	−
F.spp.2385	2011	F. culmorum	Shropshire	seed	Fc01 F/R	−	−	X	−	−	X
F.spp.2394	2011	F. culmorum	Devon	seed	Fc01 F/R	−	−	X	−	−	X
F.spp.2400	2011	F. culmorum	Herefordshire	seed	Data n/a	−	−	X	−	−	X
F.spp.2404	2011	F. culmorum	Nottinghamshire	seed	Fc01 F/R	−	−	X	−	−	X
F.spp.2415	2011	F. culmorum	Nottinghamshire	seed	Data n/a	−	−	X	−	−	X
F.spp.2427	2011	F. culmorum	Shropshire	seed	Data n/a	−	−	X	−	−	X
F.spp.2429	2011	F. culmorum	Devon	seed	Data n/a	−	−	X	−	−	X
F.spp.2432	2011	F. culmorum	Shropshire	seed	Data n/a	−	−	X	−	−	X
F.spp.2433	2011	F. culmorum	Shropshire	seed	Data n/a	−	−	X	−	−	X
F.spp.2450	2011	F. culmorum	Nottinghamshire	seed	Fc01F/R	−	−	X	−	−	X
F.spp.2453	2011	F. culmorum	Devon	seed	Fc01 F/R	−	−	X	−	−	X
F.spp.2456	2011	F. culmorum	Devon	seed	Fc01F/R	−	−	X	−	−	X
F.spp.2460	2011	F. culmorum	Nottinghamshire	seed	Data n/a	−	X	−	−	X	−
F.spp.2462	2011	F. culmorum	Lincolnshire	seed	Data n/a	−	X	−	−	X	−
F.spp.2466	2011	F. culmorum	Nottinghamshire	seed	Data n/a	−	X	−	−	X	−
F.spp.2473	2011	F. culmorum	Devon	seed	Data n/a	−	X	−	−	X	−
F.spp.2480	2011	F. culmorum	Devon	seed	Data n/a	−	X	−	−	X	−
F.spp.2481	2011	F. culmorum	Lincolnshire	seed	Data n/a	−	X	−	−	X	−
F.spp.2482	2011	F. culmorum	Nottinghamshire	seed	Fc01F/R	−	X	−	−	X	−
F.spp.2484	2011	F. culmorum	Devon	seed	Data n/a	−	X	−	−	X	−
F.spp.2487	2011	F. culmorum	Herefordshire	seed	Data n/a	−	−	X	−	−	X
F.spp.2492	2011	F. culmorum	Devon	seed	Data n/a	−	−	X	−	−	X
F.spp.2497	2011	F. culmorum	Devon	seed	Fc01 F/R	−	−	X	−	−	X
F.spp.2499	2011	F. culmorum	Shropshire	seed	Fc01 F/R	−	−	X	−	−	X
F.spp.2500	2011	F. culmorum	Devon	seed	Fc01 F/R	−	−	X	−	−	X
F.spp.2660	2011	F. culmorum	Shropshire	stalk	Fc01 F/R	−	−	X	−	−	X
F.spp.2675	2011	F. culmorum	Yorkshire	stalk	Fc01 F/R	−	−	X	−	−	X
F.spp.2804	2011	F. culmorum	Herefordshire	seed	Fc01 F/R	−	X	−	−	X	−
F.spp.2822	2011	F. culmorum	Devon	stalk	Fc01 F/R	−	−	X	−	−	X
F.spp.2839	2011	F. culmorum	Sussex	stalk	Fc01 F/R	−	−	X	−	−	X
F.spp.2845	2011	F. culmorum	Sussex	stalk	Fc01 F/R	−	−	X	−	−	X
F.spp.2895	2011	F. culmorum	Oxfordshire	stalk	Fc01 F/R	−	−	X	−	−	X
F.spp.2908	2011	F. culmorum	Sussex	stalk	Fc01 F/R	−	−	X	−	−	X
F.spp.2911	2011	F. culmorum	Shropshire	stalk	Fc01 F/R	−	−	X	−	−	X
F.spp.2963	2011	F. culmorum	Nottinghamshire	stalk	Fc01 F/R	−	−	X	−	−	X
F.spp.2971	2011	F. culmorum	Nottinghamshire	stalk	Fc01 F/R	−	−	X	−	−	X
F.spp.2975	2011	F. culmorum	Nottinghamshire	stalk	Fc01 F/R	−	X	−	−	X	−
F.spp.3002	2011	F. culmorum	Nottinghamshire	seed	Fc01 F/R	−	X	−	−	X	−
F.spp.3026	2011	F. culmorum	Nottinghamshire	stalk	Fc01 F/R	−	−	X	−	−	X
F.spp.3062	2011	F. culmorum	Shropshire	seed	Fc01 F/R	−	−	X	−	−	X
F.spp.3066	2011	F. culmorum	Nottinghamshire	seed	Fc01 F/R	−	−	X	−	−	X
F.spp.3176	2011	F. culmorum	Gloucestershire	stalk	Fc01 F/R	−	−	X	−	−	X
F.spp.3180	2011	F. culmorum	Gloucestershire	seed	Fc01 F/R	−	−	X	−	−	X
F.spp.3186	2011	F. culmorum	Gloucestershire	seed	Fc01 F/R	−	−	X	−	−	X
F.spp.406	2011	F. culmorum	Sussex	stalk	Fc01 F/R	−	−	X	−	−	X
F.spp.408	2011	F. culmorum	Sussex	stalk	Fc01 F/R	−	−	X	−	−	X
F.spp.414	2011	F. culmorum	Sussex	stalk	Fc01 F/R	−	−	X	−	−	X
F.spp.427	2011	F. culmorum	Sussex	stalk	Fc01 F/R	−	−	X	−	−	X
F.spp.429	2011	F. culmorum	Sussex	stalk	Fc01 F/R	−	−	X	−	−	X
F.spp.447	2011	F. culmorum	Sussex	stalk	Fc01 F/R	−	X	−	−	X	−
F.spp.451	2011	F. culmorum	Sussex	stalk	Fc01 F/R	−	−	X	−	−	X
F.spp.458	2011	F. culmorum	Sussex	stalk	Fc01 F/R	−	−	X	−	−	X
F.spp.463	2011	F. culmorum	Sussex	stalk	Fc01 F/R	−	−	X	−	−	X
F.spp.464	2011	F. culmorum	Sussex	stalk	Fc01 F/R	−	−	X	−	−	X
F.spp.468	2011	F. culmorum	Gloucestershire	stalk	Fc01 F/R	−	−	X	−	−	X
F.spp.475	2011	F. culmorum	Gloucestershire	stalk	Fc01 F/R	−	−	X	−	−	X
F.spp.496	2011	F. culmorum	Gloucestershire	stalk	Fc01 F/R	−	−	X	−	−	X
F.spp.502	2011	F. culmorum	Sussex	seed	Fc01 F/R	−	X	−	−	X	−
F.spp.545	2011	F. culmorum	Gloucestershire	stalk	Fc01 F/R	−	−	X	−	−	X
F.spp.551	2011	F. culmorum	Gloucestershire	stalk	Fc01 F/R	−	−	X	−	−	X
F.spp.557	2011	F. culmorum	Gloucestershire	stalk	Fc01 F/R	−	−	X	−	−	X
F.spp.582	2011	F. culmorum	Gloucestershire	seed	Fc01 F/R	−	−	X	−	−	X
F.spp.605	2011	F. culmorum	Gloucestershire	seed	Fc01 F/R	−	−	X	−	−	X
F.spp.609	2011	F. culmorum	Gloucestershire	seed	Fc01 F/R	−	−	X	−	−	X
F.spp.638	2011	F. culmorum	Somerset	stalk	Fc01 F/R	−	−	X	−	−	X
F.spp.653	2011	F. culmorum	Gloucestershire	stalk	Fc01 F/R	−	−	X	−	−	X
F.spp.658	2011	F. culmorum	Shropshire	stalk	Fc01 F/R	−	−	X	−	−	X
F.spp.682	2011	F. culmorum	Shropshire	stalk	Fc01 F/R	−	−	X	−	−	X
F.spp.710	2011	F. culmorum	Shropshire	stalk	Fc01 F/R	−	−	X	−	−	X
F.spp.712	2011	F. culmorum	Oxfordshire	stalk	Fc01 F/R	−	−	X	−	−	X
F.spp.713	2011	F. culmorum	Shropshire	stalk	Fc01 F/R	−	−	X	−	−	X
F.spp.721	2011	F. culmorum	Shropshire	stalk	Fc01 F/R	−	X	−	−	X	−
F.spp.734	2011	F. culmorum	Oxfordshire	stalk	Fc01 F/R	−	−	X	−	−	X
F.spp.737	2011	F. culmorum	Gloucestershire	stalk	Fc01 F/R	−	−	X	−	−	X
F.spp.744	2011	F. culmorum	Shropshire	stalk	Fc01 F/R	−	−	X	−	−	X
F.spp.749	2011	F. culmorum	Somerset	stalk	Fc01 F/R	−	−	X	−	−	X
F.spp.759	2011	F. culmorum	Oxfordshire	stalk	Fc01 F/R	−	−	X	−	−	X
F.spp.777	2011	F. culmorum	Herefordshire	stalk	Fc01 F/R	−	−	X	−	−	X
F.spp.782	2011	F. culmorum	Yorkshire	stalk	Fc01 F/R	−	X	−	−	X	−
F.spp.812	2011	F. culmorum	Oxfordshire	stalk	Fc01 F/R	−	−	X	−	−	X
F.spp.832	2011	F. culmorum	Yorkshire	stalk	Fc01 F/R	−	X	−	−	X	−
F.spp.839	2011	F. culmorum	Shropshire	stalk	Fc01 F/R	−	−	X	−	−	X
F.spp.855	2011	F. culmorum	Somerset	seed	Fc01 F/R	−	X	−	−	X	−
F.spp.873	2011	F. culmorum	Gloucestershire	stalk	Fc01 F/R	−	−	X	−	−	X
F.spp.884	2011	F. culmorum	Shropshire	seed	Fc01 F/R	−	−	X	−	−	X
F.spp.896	2011	F. culmorum	Somerset	seed	Fc01 F/R	−	X	−	−	X	−
F.spp.903	2011	F. culmorum	Shropshire	seed	Fc01 F/R	−	−	X	−	−	X
F.spp.925	2011	F. culmorum	Gloucestershire	seed	Fc01 F/R	−	−	X	−	−	X
F.spp.930	2011	F. culmorum	Somerset	seed	Fc01 F/R	−	−	X	−	−	X
F.spp.937	2011	F. culmorum	Oxfordshire	seed	Fc01 F/R	−	−	X	−	−	X
F.spp.945	2011	F. culmorum	Yorkshire	stalk	Fc01 F/R	−	X	−	−	X	−
F.spp.948	2011	F. culmorum	Shropshire	seed	Fc01 F/R	−	−	X	−	−	X
F.spp.949	2011	F. culmorum	Gloucestershire	stalk	Fc01 F/R	−	−	X	−	−	X
F.spp.953	2011	F. culmorum	Oxfordshire	seed	Fc01 F/R	−	X	−	−	X	−
F.spp.966	2011	F. culmorum	Yorkshire	stalk	Fc01 F/R	−	X	−	−	X	−
F.spp.969	2011	F. culmorum	Yorkshire	stalk	Fc01 F/R	−	−	X	−	−	X
F.spp.971	2011	F. culmorum	Yorkshire	stalk	Fc01 F/R	−	−	X	−	−	X
F.spp.989	2011	F. culmorum	Yorkshire	stalk	Fc01 F/R	−	−	X	−	−	X
F.spp.998	2011	F. culmorum	Shropshire	stalk	Fc01 F/R	−	−	X	−	−	X
F.spp.3527	2012	F. culmorum	Kent	Stalk	Fc01 F/R	−	−	X	−	−	X
F.spp.3537	2012	F. culmorum	Kent	Stalk	Fc01 F/R	−	−	X	−	−	X
F.spp.3567	2012	F. culmorum	Kent	Stalk	Fc01 F/R	−	−	X	−	−	X
F.spp.3570	2012	F. culmorum	Kent	Stalk	Fc01 F/R	−	−	X	−	−	X
F.spp.3595	2012	F. culmorum	Kent	Stalk	Fc01 F/R	−	−	X	−	−	X
F.spp.3623	2012	F. culmorum	Kent	Stalk	Fc01 F/R	−	X	−	−	X	−
F.spp.3642	2012	F. culmorum	Kent	Stalk	Fc01 F/R	−	−	X	−	−	X
F.spp.3648	2012	F. culmorum	Shropshire	Stalk	Fc01 F/R	−	−	X	−	−	X
F.spp.3653	2012	F. culmorum	Shropshire	Stalk	Fc01 F/R	−	−	X	−	−	X
F.spp.3661	2012	F. culmorum	Shropshire	Stalk	Fc01 F/R	−	−	X	−	−	X
F.spp.3669	2012	F. culmorum	Shropshire	Stalk	Fc01 F/R	−	−	X	−	−	X
F.spp.3677	2012	F. culmorum	Shropshire	Stalk	Fc01 F/R	−	−	X	−	−	X
F.spp.3683	2012	F. culmorum	Shropshire	Stalk	Fc01 F/R	−	−	X	−	−	X
F.spp.3687	2012	F. culmorum	Shropshire	Stalk	Fc01 F/R	−	−	X	−	−	X
F.spp.3697	2012	F. culmorum	Shropshire	Stalk	Fc01 F/R	−	−	X	−	−	X
F.spp.3701	2012	F. culmorum	Shropshire	Stalk	Fc01 F/R	−	−	X	−	−	X
F.spp.3708	2012	F. culmorum	Shropshire	Stalk	Fc01 F/R	−	−	X	−	−	X
F.spp.3716	2012	F. culmorum	Shropshire	Stalk	Fc01 F/R	−	−	X	−	−	X
F.spp.3722	2012	F. culmorum	Shropshire	Stalk	Fc01 F/R	−	−	X	−	−	X
F.spp.3732	2012	F. culmorum	Shropshire	Stalk	Fc01 F/R	−	−	X	−	−	X
F.spp.3736	2012	F. culmorum	Shropshire	Stalk	Fc01 F/R	−	−	X	−	−	X
F.spp.3741	2012	F. culmorum	Shropshire	Stalk	Fc01 F/R	−	−	X	−	−	X
F.spp.3751	2012	F. culmorum	Shropshire	Stalk	Fc01 F/R	−	−	X	−	−	X
F.spp.3757	2012	F. culmorum	Shropshire	Stalk	Fc01 F/R	−	−	X	−	−	X
F.spp.3761	2012	F. culmorum	Shropshire	Stalk	Fc01 F/R	−	−	X	−	−	X
F.spp.3778	2012	F. culmorum	Shropshire	Stalk	Fc01 F/R	−	−	X	−	−	X
F.spp.3780	2012	F. culmorum	Shropshire	Stalk	Fc01 F/R	−	−	X	−	−	X
F.spp.3783	2012	F. culmorum	Shropshire	Stalk	Fc01 F/R	−	−	X	−	−	X
F.spp.3784	2012	F. culmorum	Shropshire	Stalk	Fc01 F/R	−	X	−	−	X	−
F.spp.3792	2012	F. culmorum	Shropshire	Stalk	Fc01 F/R	−	−	X	−	−	X
F.spp.3795	2012	F. culmorum	Shropshire	seed	Fc01 F/R	−	X	−	−	X	−
F.spp.3796	2012	F. culmorum	Shropshire	seed	Fc01 F/R	−	X	−	−	X	−
F.spp.3797	2012	F. culmorum	Shropshire	seed	Fc01 F/R	−	X	−	−	X	−
F.spp.3799	2012	F. culmorum	Shropshire	seed	Fc01 F/R	−	X	−	−	X	−
F.spp.3800	2012	F. culmorum	Shropshire	seed	Fc01 F/R	−	X	−	−	X	−
F.spp.3969	2012	F. culmorum	Herefordshire	Stalk	Fc01 F/R	−	−	X	−	−	X
F.spp.3972	2012	F. culmorum	Herefordshire	Stalk	Fc01 F/R	−	−	X	−	−	X
F.spp.3981	2012	F. culmorum	Herefordshire	Stalk	Fc01 F/R	−	−	X	−	−	X
F.spp.3983	2012	F. culmorum	Herefordshire	Stalk	Fc01 F/R	−	−	X	−	−	X
F.spp.3984	2012	F. culmorum	Herefordshire	Stalk	Fc01 F/R	−	X	−	−	X	−
F.spp.3986	2012	F. culmorum	Herefordshire	Stalk	Fc01 F/R	−	−	X	−	−	X
F.spp.3988	2012	F. culmorum	Herefordshire	Stalk	Fc01 F/R	−	−	X	−	−	X
F.spp.3995	2012	F. culmorum	Herefordshire	Stalk	Fc01 F/R	−	X	−	−	X	−
F.spp.3996	2012	F. culmorum	Herefordshire	Stalk	Fc01 F/R	−	−	X	−	−	X
F.spp.3998	2012	F. culmorum	Herefordshire	Stalk	Fc01 F/R	−	−	X	−	−	X
F.spp.4000	2012	F. culmorum	Herefordshire	Stalk	Fc01 F/R	−	−	X	−	−	X
F.spp.4001	2012	F. culmorum	Herefordshire	Stalk	Fc01 F/R	−	−	X	−	−	X
F.spp.4001	2012	F. culmorum	Herefordshire	Stalk	Fc01 F/R	−	X	−	−	X	−
F.spp.4003	2012	F. culmorum	Herefordshire	Stalk	Fc01 F/R	−	−	X	−	−	X
F.spp.4005	2012	F. culmorum	Herefordshire	Stalk	Fc01 F/R	−	−	X	−	−	X
F.spp.4009	2012	F. culmorum	Herefordshire	Stalk	Fc01 F/R	−	−	X	−	−	X
F.spp.4010	2012	F. culmorum	Herefordshire	Stalk	Fc01 F/R	−	−	X	−	−	X
F.spp.4012	2012	F. culmorum	Herefordshire	Stalk	Fc01 F/R	−	−	X	−	−	X
F.spp.4014	2012	F. culmorum	Herefordshire	Stalk	Fc01 F/R	−	−	X	−	−	X
F.spp.4019	2012	F. culmorum	Herefordshire	Stalk	Fc01 F/R	−	−	X	−	−	X
F.spp.4030	2012	F. culmorum	Herefordshire	Stalk	Fc01 F/R	−	−	X	−	−	X
F.spp.4047	2012	F. culmorum	Herefordshire	Stalk	Fc01 F/R	−	−	X	−	−	X
F.spp.4051	2012	F. culmorum	Herefordshire	Stalk	Fc01 F/R	−	−	X	−	−	X
F.spp.4064	2012	F. culmorum	York	Stalk	Fc01 F/R	−	−	X	−	−	X
F.spp.4065	2012	F. culmorum	York	Stalk	Fc01 F/R	−	−	X	−	−	X
F.spp.4067	2012	F. culmorum	York	Stalk	Fc01 F/R	−	−	X	−	−	X
F.spp.4069	2012	F. culmorum	York	Stalk	Fc01 F/R	−	−	X	−	−	X
F.spp.4072	2012	F. culmorum	York	Stalk	Fc01 F/R	−	−	X	−	−	X
F.spp.4079	2012	F. culmorum	York	Stalk	Fc01 F/R	−	−	X	−	−	X
F.spp.4091	2012	F. culmorum	York	Stalk	Fc01 F/R	−	−	X	−	−	X
F.spp.4096	2012	F. culmorum	York	Stalk	Fc01 F/R	−	−	X	−	−	X
F.spp.4099	2012	F. culmorum	York	Stalk	Fc01 F/R	−	−	X	−	−	X
F.spp.4104	2012	F. culmorum	York	Stalk	Fc01 F/R	−	−	X	−	−	X
F.spp.4107	2012	F. culmorum	York	Stalk	Fc01 F/R	−	−	X	−	−	X
F.spp.4112	2012	F. culmorum	York	Stalk	Fc01 F/R	−	−	X	−	−	X
F.spp.4113	2012	F. culmorum	York	Stalk	Fc01 F/R	−	−	X	−	−	X
F.spp.4116	2012	F. culmorum	York	Stalk	Fc01 F/R	−	−	X	−	−	X
F.spp.4117	2012	F. culmorum	York	Stalk	Fc01 F/R	−	−	X	−	−	X
F.spp.4118	2012	F. culmorum	York	Stalk	Fc01 F/R	−	−	X	−	−	X
F.spp.4119	2012	F. culmorum	York	Stalk	Fc01 F/R	−	−	X	−	−	X
F.spp.4120	2012	F. culmorum	York	Stalk	Fc01 F/R	−	−	X	−	−	X
F.spp.4128	2012	F. culmorum	York	Stalk	Fc01 F/R	−	−	X	−	−	X
F.spp.4129	2012	F. culmorum	York	Stalk	Fc01 F/R	−	−	X	−	−	X
F.spp.4131	2012	F. culmorum	York	Stalk	Fc01 F/R	−	−	X	−	−	X
F.spp.4135	2012	F. culmorum	York	Stalk	Fc01 F/R	−	−	X	−	−	X
F.spp.4153	2012	F. culmorum	York	Stalk	Fc01 F/R	−	−	X	−	−	X
F.spp.4158	2012	F. culmorum	Herefordshire	seed	Fc01 F/R	−	−	X	−	−	X
F.spp.4164	2012	F. culmorum	Herefordshire	seed	Fc01 F/R	−	−	X	−	−	X
F.spp.4193	2012	F. culmorum	Devon	Stalk	Fc01 F/R	−	−	X	−	−	X
F.spp.4194	2012	F. culmorum	Devon	Stalk	Fc01 F/R	−	−	X	−	−	X
F.spp.4221	2012	F. culmorum	Devon	Stalk	Fc01 F/R	−	−	X	−	−	X
F.spp.4238	2012	F. culmorum	Devon	Stalk	Fc01 F/R	−	−	X	−	−	X
F.spp.4271	2012	F. culmorum	Devon	Stalk	Fc01 F/R	−	−	X	−	−	X
F.spp.4276	2012	F. culmorum	Devon	Stalk	Fc01 F/R	−	−	X	−	−	X
F.spp.3022	2011a	F. culmorum	Somerset	seed	Fc01 F/R	−	X	−	−	X	−
F.spp.3028	2011a	F. culmorum	Somerset	seed	Fc01 F/R	−	X	−	−	X	−
F.spp.3034	2011a	F. culmorum	Herefordshire	seed	Fc01 F/R	−	X	−	−	X	−
F.spp.3035	2011a	F. culmorum	Somerset	seed	Fc01 F/R	−	X	−	−	X	−
F.spp.3041	2011a	F. culmorum	Lincolnshire	seed	Fc01 F/R	−	−	X	−	−	X
F.spp.3049	2011a	F. culmorum	Devon	seed	Fc01 F/R	−	X	−	−	X	−
F.spp.3054	2011a	F. culmorum	Devon	seed	Fc01 F/R	−	X	−	−	X	−
F.spp.3055	2011a	F. culmorum	Herefordshire	seed	Fc01 F/R	−	X	−	−	X	−
F.spp.3066	2011a	F. culmorum	Somerset	seed	Fc01 F/R	−	−	X	−	−	X
F.spp.3071	2011a	F. culmorum	Devon	seed	Fc01 F/R	−	X	−	−	X	−
F.spp.3073	2011a	F. culmorum	Nottinghamshire	seed	Fc01 F/R	−	X	−	−	X	−
F.spp.3081	2011a	F. culmorum	Lincolnshire	seed	Fc01 F/R	−	X	−	−	X	−
F.spp.3082	2011a	F. culmorum	Lincolnshire	seed	Fc01 F/R	−	−	X	−	−	X
F.spp.3088	2011a	F. culmorum	Nottinghamshire	seed	Fc01 F/R	−	X	−	−	X	−
F.spp.3091	2011a	F. culmorum	Nottinghamshire	seed	Fc01 F/R	−	−	X	−	−	X
F.spp.3095	2011a	F. culmorum	Devon	seed	Fc01 F/R	−	X	−	−	X	−
F.spp.3098	2011a	F. culmorum	Devon	seed	Fc01 F/R	−	X	−	−	X	−
F.spp.3105	2011a	F. culmorum	Devon	seed	Fc01 F/R	−	X	−	−	X	−
F.spp.3107	2011a	F. culmorum	Herefordshire	seed	Fc01 F/R	−	−	X	−	−	X
F.spp.3108	2011a	F. culmorum	Herefordshire	seed	Fc01 F/R	−	−	X	−	−	X
F.spp.3125	2011a	F. culmorum	Nottinghamshire	seed	Fc01 F/R	−	−	X	−	−	X
F.spp.3126	2011a	F. culmorum	Nottinghamshire	seed	Fc01 F/R	−	X	−	−	X	−
F.spp.3128	2011a	F. culmorum	Nottinghamshire	seed	Fc01 F/R	−	−	X	−	−	X
F.spp.3133	2011a	F. culmorum	Nottinghamshire	seed	Fc01 F/R	−	−	X	−	−	X
F.spp.3141	2011a	F. culmorum	Nottinghamshire	seed	Fc01 F/R	−	X	−	−	X	−
F.spp.3152	2011a	F. culmorum	Nottinghamshire	seed	Fc01 F/R	−	−	X	−	−	X

## Sheet: Fg TCT genotype
Fungal ID	Year	species	Location	seed/Stalk	F. spp Assay	Tri3 -7 (15AcDON)	Tri3 -7 (3AcDON)	Tri3 -7 (NIV)	Tri12 (15AcDON)	Tri12 (3AcDON)	Tri12 (NIV)
F.spp.1003	2011	F. graminearum	Yorkshire	stalk	Fg16F/R	X	−	−	X	−	−
F.spp.1007	2011	F. graminearum	Yorkshire	stalk	Fg16F/R	X	−	−	X	−	−
F.spp.1017	2011	F. graminearum	Oxfordshire	seed	Fg16F/R	X	−	−	X	−	−
F.spp.1025	2011	F. graminearum	Yorkshire	stalk	Data n/a	X	−	−	X	−	−
F.spp.1029	2011	F. graminearum	Oxfordshire	seed	Fg16F/R	X	−	−	X	−	−
F.spp.1046	2011	F. graminearum	Oxfordshire	seed	Fg16F/R	X	−	−	X	−	−
F.spp.1048	2011	F. graminearum	Yorkshire	stalk	Fg16F/R	X	−	−	X	−	−
F.spp.1049	2011	F. graminearum	Oxfordshire	seed	Fg16F/R	X	−	−	X	−	−
F.spp.1051	2011	F. graminearum	Oxfordshire	stalk	Data n/a	X	−	−	X	−	−
F.spp.1074	2011	F. graminearum	Yorkshire	stalk	Fg16F/R	X	−	−	X	−	−
F.spp.1083	2011	F. graminearum	Yorkshire	stalk	Fg16F/R	X	−	−	X	−	−
F.spp.1097	2011	F. graminearum	Oxfordshire	stalk	Fg16F/R	X	−	−	X	−	−
F.spp.1100	2011	F. graminearum	Oxfordshire	stalk	Data n/a	X	−	−	X	−	−
F.spp.1105	2011	F. graminearum	Oxfordshire	stalk	Fg16F/R	X	−	−	X	−	−
F.spp.1109	2011	F. graminearum	Oxfordshire	stalk	Fg16F/R	X	−	−	X	−	−
F.spp.1113	2011	F. graminearum	Yorkshire	stalk	Fg16F/R	X	−	−	X	−	−
F.spp.1114	2011	F. graminearum	Yorkshire	stalk	Fg16F/R	X	−	−	X	−	−
F.spp.1121	2011	F. graminearum	Oxfordshire	stalk	Fg16F/R	X	−	−	X	−	−
F.spp.1124	2011	F. graminearum	Oxfordshire	stalk	Fg16F/R	X	−	−	X	−	−
F.spp.1136	2011	F. graminearum	Yorkshire	stalk	Fg16F/R	X	−	−	X	−	−
F.spp.1141	2011	F. graminearum	Yorkshire	stalk	Fg16F/R	X	−	−	X	−	−
F.spp.1145	2011	F. graminearum	Yorkshire	stalk	Fg16F/R	X	−	−	X	−	−
F.spp.1153	2011	F. graminearum	Yorkshire	stalk	Fg16F/R	X	−	−	X	−	−
F.spp.1154	2011	F. graminearum	Yorkshire	stalk	Fg16F/R	X	−	−	X	−	−
F.spp.1160	2011	F. graminearum	Shropshire	stalk	Fg16F/R	X	−	−	X	−	−
F.spp.1172	2011	F. graminearum	Oxfordshire	seed	Fg16F/R	X	−	−	X	−	−
F.spp.1175	2011	F. graminearum	Yorkshire	seed	Fg16F/R	X	−	−	X	−	−
F.spp.1176	2011	F. graminearum	Yorkshire	seed	Fg16F/R	X	−	−	X	−	−
F.spp.1181	2011	F. graminearum	Oxfordshire	seed	Fg16F/R	−	−	X	−	−	X
F.spp.1194	2011	F. graminearum	Oxfordshire	seed	Fg16F/R	X	−	−	X	−	−
F.spp.1201	2011	F. graminearum	Yorkshire	seed	Fg16F/R	X	−	−	X	−	−
F.spp.1202	2011	F. graminearum	Yorkshire	seed	Fg16F/R	X	−	−	X	−	−
F.spp.1209	2011	F. graminearum	Oxfordshire	seed	Fg16F/R	X	−	−	X	−	−
F.spp.1213	2011	F. graminearum	Oxfordshire	seed	Fg16F/R	X	−	−	X	−	−
F.spp.1230	2011	F. graminearum	Yorkshire	seed	Fg16F/R	X	−	−	X	−	−
F.spp.1237	2011	F. graminearum	Oxfordshire	seed	Fg16F/R	X	−	−	X	−	−
F.spp.1278	2011	F. graminearum	Yorkshire	seed	Fg16F/R	X	−	−	X	−	−
F.spp.1280	2011	F. graminearum	Yorkshire	seed	Fg16F/R	−	−	X	−	−	X
F.spp.1298	2011	F. graminearum	herefordshire	seed	Fg16F/R	X	−	−	X	−	−
F.spp.1299	2011	F. graminearum	Yorkshire	seed	Fg16F/R	X	−	−	X	−	−
F.spp.1300	2011	F. graminearum	Oxfordshire	seed	Fg16F/R	X	−	−	X	−	−
F.spp.1307	2011	F. graminearum	Shropshire	seed	Fg16F/R	X	−	−	X	−	−
F.spp.1311	2011	F. graminearum	Yorkshire	seed	Fg16F/R	X	−	−	X	−	−
F.spp.1317	2011	F. graminearum	Yorkshire	seed	Fg16F/R	X	−	−	X	−	−
F.spp.1328	2011	F. graminearum	Sussex	stalk	Fg16F/R	X	−	−	X	−	−
F.spp.1338	2011	F. graminearum	Devon	stalk	Fg16F/R	−	−	X	−	−	X
F.spp.1344	2011	F. graminearum	Devon	stalk	Fg16F/R	−	−	X	−	−	X
F.spp.1361	2011	F. graminearum	Devon	stalk	Fg16F/R	X	−	−	X	−	−
F.spp.1364	2011	F. graminearum	Oxfordshire	stalk	Fg16F/R	X	−	−	X	−	−
F.spp.1367	2011	F. graminearum	Oxfordshire	stalk	Fg16F/R	X	−	−	X	−	−
F.spp.1372	2011	F. graminearum	Sussex	stalk	Fg16F/R	X	−	−	X	−	−
F.spp.1378	2011	F. graminearum	Oxfordshire	stalk	Fg16F/R	X	−	−	X	−	−
F.spp.1387	2011	F. graminearum	Oxfordshire	stalk	Fg16F/R	X	−	−	X	−	−
F.spp.1397	2011	F. graminearum	Oxfordshire	stalk	Fg16F/R	X	−	−	X	−	−
F.spp.1398	2011	F. graminearum	Oxfordshire	stalk	Fg16F/R	X	−	−	X	−	−
F.spp.1404	2011	F. graminearum	Oxfordshire	stalk	Fg16F/R	X	−	−	X	−	−
F.spp.1410	2011	F. graminearum	Sussex	stalk	Fg16F/R	X	−	−	X	−	−
F.spp.1412	2011	F. graminearum	Oxfordshire	stalk	Fg16F/R	X	−	−	X	−	−
F.spp.1420	2011	F. graminearum	Devon	stalk	Fg16F/R	−	−	X	−	−	X
F.spp.1421	2011	F. graminearum	Shropshire	stalk	Fg16F/R	X	−	−	X	−	−
F.spp.1423	2011	F. graminearum	Shropshire	stalk	Fg16F/R	−	−	X	−	−	X
F.spp.1436	2011	F. graminearum	Sussex	stalk	Fg16F/R	X	−	−	X	−	−
F.spp.1447	2011	F. graminearum	Devon	stalk	Data n/a	−	−	X	−	−	X
F.spp.1451	2011	F. graminearum	Oxfordshire	stalk	Fg16F/R	X	−	−	X	−	−
F.spp.1456	2011	F. graminearum	Somerset	stalk	Fg16F/R	−	−	X	−	−	X
F.spp.1468	2011	F. graminearum	Devon	stalk	Fg16F/R	−	−	X	−	−	X
F.spp.1476	2011	F. graminearum	Devon	stalk	Fg16F/R	−	−	X	−	−	X
F.spp.1480	2011	F. graminearum	Oxfordshire	stalk	Fg16F/R	X	−	−	X	−	−
F.spp.1489	2011	F. graminearum	Somerset	seed	Fg16F/R	X	−	−	X	−	−
F.spp.1494	2011	F. graminearum	Oxfordshire	stalk	Fg16F/R	X	−	−	X	−	−
F.spp.1498	2011	F. graminearum	Oxfordshire	stalk	Fg16F/R	X	−	−	X	−	−
F.spp.1507	2011	F. graminearum	Devon	stalk	Fg16F/R	−	−	X	−	−	X
F.spp.1513	2011	F. graminearum	Shropshire	seed	Data n/a	−	−	X	−	−	X
F.spp.1515	2011	F. graminearum	Oxfordshire	seed	Fg16F/R	X	−	−	X	−	−
F.spp.1533	2011	F. graminearum	Oxfordshire	stalk	Data n/a	−	−	X	−	−	X
F.spp.1539	2011	F. graminearum	Devon	seed	Data n/a	X	−	−	X	−	−
F.spp.1541	2011	F. graminearum	Devon	stalk	Fg16F/R	X	−	−	X	−	−
F.spp.1547	2011	F. graminearum	Oxfordshire	seed	Fg16F/R	X	−	−	X	−	−
F.spp.1555	2011	F. graminearum	Sussex	stalk	Fg16F/R	X	−	−	X	−	−
F.spp.1560	2011	F. graminearum	Oxfordshire	stalk	Fg16F/R	X	−	−	X	−	−
F.spp.1581	2011	F. graminearum	Sussex	stalk	Fg16F/R	X	−	−	X	−	−
F.spp.1586	2011	F. graminearum	Somerset	stalk	Fg16F/R	X	−	−	X	−	−
F.spp.1610	2011	F. graminearum	Sussex	stalk	Fg16F/R	X	−	−	X	−	−
F.spp.1611	2011	F. graminearum	Oxfordshire	stalk	Fg16F/R	X	−	−	X	−	−
F.spp.1621	2011	F. graminearum	Sussex	stalk	Fg16F/R	X	−	−	X	−	−
F.spp.1623	2011	F. graminearum	Sussex	stalk	Fg16F/R	X	−	−	X	−	−
F.spp.1627	2011	F. graminearum	Devon	stalk	Fg16F/R	−	−	X	−	−	X
F.spp.1629	2011	F. graminearum	herefordshire	stalk	Fg16F/R	X	−	−	X	−	−
F.spp.1638	2011	F. graminearum	Sussex	stalk	Fg16F/R	X	−	−	X	−	−
F.spp.1639	2011	F. graminearum	Sussex	stalk	Fg16F/R	X	−	−	X	−	−
F.spp.1640	2011	F. graminearum	Sussex	stalk	Data n/a	X	−	−	X	−	−
F.spp.1643	2011	F. graminearum	Devon	stalk	Fg16F/R	−	−	X	−	−	X
F.spp.1654	2011	F. graminearum	Somerset	stalk	Fg16F/R	−	−	X	−	−	X
F.spp.1661	2011	F. graminearum	Oxfordshire	seed	Fg16F/R	X	−	−	X	−	−
F.spp.1673	2011	F. graminearum	Sussex	seed	Fg16F/R	−	−	X	−	−	X
F.spp.1675	2011	F. graminearum	Shropshire	seed	Fg16F/R	X	−	−	X	−	−
F.spp.1676	2011	F. graminearum	Sussex	seed	Fg16F/R	X	−	−	X	−	−
F.spp.1685	2011	F. graminearum	Sussex	seed	Data n/a	−	−	X	−	−	X
F.spp.1704	2011	F. graminearum	Devon	seed	Fg16F/R	X	−	−	X	−	−
F.spp.1714	2011	F. graminearum	Oxfordshire	seed	Fg16F/R	X	−	−	X	−	−
F.spp.1718	2011	F. graminearum	Oxfordshire	seed	Fg16F/R	X	−	−	X	−	−
F.spp.1720	2011	F. graminearum	Somerset	seed	Fg16F/R	X	−	−	X	−	−
F.spp.1726	2011	F. graminearum	Oxfordshire	seed	Fg16F/R	X	−	−	X	−	−
F.spp.1735	2011	F. graminearum	Oxfordshire	seed	Fg16F/R	X	−	−	X	−	−
F.spp.1740	2011	F. graminearum	Sussex	seed	Fg16F/R	X	−	−	X	−	−
F.spp.1744	2011	F. graminearum	Oxfordshire	seed	Fg16F/R	X	−	−	X	−	−
F.spp.1746	2011	F. graminearum	Oxfordshire	seed	Fg16F/R	X	−	−	X	−	−
F.spp.1749	2011	F. graminearum	Oxfordshire	seed	Fg16F/R	X	−	−	X	−	−
F.spp.1761	2011	F. graminearum	Oxfordshire	seed	Fg16F/R	X	−	−	X	−	−
F.spp.1762	2011	F. graminearum	Oxfordshire	seed	Fg16F/R	X	−	−	X	−	−
F.spp.1773	2011	F. graminearum	Oxfordshire	seed	Fg16F/R	X	−	−	X	−	−
F.spp.1774	2011	F. graminearum	Sussex	seed	Fg16F/R	X	−	−	X	−	−
F.spp.1782	2011	F. graminearum	Oxfordshire	seed	Fg16F/R	X	−	−	X	−	−
F.spp.1790	2011	F. graminearum	Devon	seed	Data n/a	−	−	X	−	−	X
F.spp.1810	2011	F. graminearum	herefordshire	seed	Fg16F/R	X	−	−	X	−	−
F.spp.1821	2011	F. graminearum	Oxfordshire	seed	Fg16F/R	X	−	−	X	−	−
F.spp.1827	2011	F. graminearum	Oxfordshire	seed	Fg16F/R	X	−	−	X	−	−
F.spp.1836	2011	F. graminearum	Devon	seed	Data n/a	X	−	−	X	−	−
F.spp.1844	2011	F. graminearum	Devon	seed	Fg16F/R	−	−	X	−	−	X
F.spp.1848	2011	F. graminearum	Somerset	seed	Fg16F/R	X	−	−	X	−	−
F.spp.1851	2011	F. graminearum	Devon	stalk	Fg16F/R	−	−	X	−	−	X
F.spp.1854	2011	F. graminearum	Lincolnshire	stalk	Fg16F/R	X	−	−	X	−	−
F.spp.1855	2011	F. graminearum	Lincolnshire	stalk	Data n/a	X	−	−	X	−	−
F.spp.1859	2011	F. graminearum	Devon	stalk	Fg16F/R	−	−	X	−	−	X
F.spp.1867	2011	F. graminearum	Lincolnshire	stalk	Fg16F/R	X	−	−	X	−	−
F.spp.1869	2011	F. graminearum	Lincolnshire	stalk	Fg16F/R	X	−	−	X	−	−
F.spp.1877	2011	F. graminearum	Nottinghamshire	stalk	Fg16F/R	X	−	−	X	−	−
F.spp.1882	2011	F. graminearum	Lincolnshire	stalk	Fg16F/R	X	−	−	X	−	−
F.spp.1892	2011	F. graminearum	Nottinghamshire	stalk	Fg16F/R	X	−	−	X	−	−
F.spp.1897	2011	F. graminearum	Nottinghamshire	stalk	Data n/a	X	−	−	X	−	−
F.spp.1905	2011	F. graminearum	Lincolnshire	stalk	Fg16F/R	X	−	−	X	−	−
F.spp.1914	2011	F. graminearum	herefordshire	stalk	Fg16F/R	X	−	−	X	−	−
F.spp.1917	2011	F. graminearum	Lincolnshire	stalk	Fg16F/R	X	−	−	X	−	−
F.spp.1921	2011	F. graminearum	Oxfordshire	seed	Fg16F/R	X	−	−	X	−	−
F.spp.1929	2011	F. graminearum	Somerset	stalk	Fg16F/R	X	−	−	X	−	−
F.spp.1938	2011	F. graminearum	Devon	stalk	Fg16F/R	−	−	X	−	−	X
F.spp.1941	2011	F. graminearum	Nottinghamshire	stalk	Fg16F/R	X	−	−	X	−	−
F.spp.1947	2011	F. graminearum	Devon	stalk	Data n/a	−	−	X	−	−	X
F.spp.1948	2011	F. graminearum	Lincolnshire	stalk	Fg16F/R	X	−	−	X	−	−
F.spp.1953	2011	F. graminearum	Lincolnshire	stalk	Fg16F/R	−	−	X	−	−	X
F.spp.1964	2011	F. graminearum	Nottinghamshire	stalk	Fg16F/R	−	−	X	−	−	X
F.spp.1968	2011	F. graminearum	Devon	stalk	Fg16F/R	−	−	X	−	−	X
F.spp.1972	2011	F. graminearum	Lincolnshire	stalk	Fg16F/R	X	−	−	X	−	−
F.spp.1976	2011	F. graminearum	Nottinghamshire	stalk	Fg16F/R	X	−	−	X	−	−
F.spp.1983	2011	F. graminearum	Nottinghamshire	stalk	Fg16F/R	−	−	X	−	−	X
F.spp.1985	2011	F. graminearum	Nottinghamshire	stalk	Fg16F/R	X	−	−	X	−	−
F.spp.1989	2011	F. graminearum	Somerset	stalk	Fg16F/R	−	−	X	−	−	X
F.spp.1990	2011	F. graminearum	Somerset	stalk	Data n/a	X	−	−	X	−	−
F.spp.2000	2011	F. graminearum	Nottinghamshire	stalk	Fg16F/R	X	−	−	X	−	−
F.spp.2007	2011	F. graminearum	Devon	stalk	Fg16F/R	X	−	−	X	−	−
F.spp.2009	2011	F. graminearum	Devon	stalk	Fg16F/R	−	−	X	−	−	X
F.spp.2013	2011	F. graminearum	Somerset	stalk	Fg16F/R	−	−	X	−	−	X
F.spp.2018	2011	F. graminearum	Nottinghamshire	stalk	Fg16F/R	X	−	−	X	−	−
F.spp.2036	2011	F. graminearum	Sussex	seed	Fg16F/R	X	−	−	X	−	−
F.spp.2039	2011	F. graminearum	Sussex	seed	Fg16F/R	X	−	−	X	−	−
F.spp.2040	2011	F. graminearum	Devon	seed	Fg16F/R	−	−	X	−	−	X
F.spp.2046	2011	F. graminearum	Lincolnshire	seed	Fg16F/R	X	−	−	X	−	−
F.spp.2048	2011	F. graminearum	herefordshire	seed	Fg16F/R	X	−	−	X	−	−
F.spp.2063	2011	F. graminearum	Lincolnshire	seed	Fg16F/R	X	−	−	X	−	−
F.spp.2068	2011	F. graminearum	Lincolnshire	seed	Fg16F/R	X	−	−	X	−	−
F.spp.2077	2011	F. graminearum	Nottinghamshire	seed	Fg16F/R	X	−	−	X	−	−
F.spp.2085	2011	F. graminearum	Devon	seed	Fg16F/R	−	−	X	−	−	X
F.spp.2086	2011	F. graminearum	Devon	seed	Data n/a	−	−	X	−	−	X
F.spp.2088	2011	F. graminearum	Devon	seed	Data n/a	X	−	−	X	−	−
F.spp.2095	2011	F. graminearum	Lincolnshire	stalk	Fg16F/R	X	−	−	X	−	−
F.spp.2118	2011	F. graminearum	Lincolnshire	stalk	Fg16F/R	X	−	−	X	−	−
F.spp.2122	2011	F. graminearum	Devon	stalk	Fg16F/R	−	−	X	−	−	X
F.spp.2126	2011	F. graminearum	Lincolnshire	stalk	Fg16F/R	X	−	−	X	−	−
F.spp.2156	2011	F. graminearum	Somerset	stalk	Fg16F/R	X	−	−	X	−	−
F.spp.2168	2011	F. graminearum	Lincolnshire	stalk	Fg16F/R	−	X	−	−	X	−
F.spp.2169	2011	F. graminearum	Somerset	stalk	Fg16F/R	X	−	−	X	−	−
F.spp.2174	2011	F. graminearum	Devon	stalk	Fg16F/R	−	−	X	−	−	X
F.spp.2188	2011	F. graminearum	Nottinghamshire	stalk	Data n/a	X	−	−	X	−	−
F.spp.2193	2011	F. graminearum	Devon	stalk	Fg16F/R	−	−	X	−	−	X
F.spp.2209	2011	F. graminearum	Devon	stalk	Fg16F/R	−	−	X	−	−	X
F.spp.2211	2011	F. graminearum	Lincolnshire	stalk	Fg16F/R	X	−	−	X	−	−
F.spp.2236	2011	F. graminearum	Nottinghamshire	seed	Fg16F/R	X	−	−	X	−	−
F.spp.2239	2011	F. graminearum	Lincolnshire	seed	Fg16F/R	X	−	−	X	−	−
F.spp.2267	2011	F. graminearum	Nottinghamshire	seed	Fg16F/R	X	−	−	X	−	−
F.spp.2268	2011	F. graminearum	Nottinghamshire	seed	Fg16F/R	X	−	−	X	−	−
F.spp.2269	2011	F. graminearum	Nottinghamshire	seed	Fg16F/R	X	−	−	X	−	−
F.spp.2275	2011	F. graminearum	Lincolnshire	seed	Fg16F/R	X	−	−	X	−	−
F.spp.2279	2011	F. graminearum	Nottinghamshire	seed	Fg16F/R	X	−	−	X	−	−
F.spp.2282	2011	F. graminearum	Sussex	seed	Fg16F/R	X	−	−	X	−	−
F.spp.2286	2011	F. graminearum	Lincolnshire	seed	Fg16F/R	X	−	−	X	−	−
F.spp.2298	2011	F. graminearum	Sussex	seed	Fg16F/R	−	X	−	−	X	−
F.spp.2300	2011	F. graminearum	Nottinghamshire	seed	Fg16F/R	X	−	−	X	−	−
F.spp.2303	2011	F. graminearum	Lincolnshire	seed	Fg16F/R	X	−	−	X	−	−
F.spp.2304	2011	F. graminearum	Nottinghamshire	seed	Fg16F/R	X	−	−	X	−	−
F.spp.2315	2011	F. graminearum	Lincolnshire	seed	Fg16F/R	X	−	−	X	−	−
F.spp.2318	2011	F. graminearum	Sussex	seed	Fg16F/R	X	−	−	X	−	−
F.spp.2328	2011	F. graminearum	Sussex	seed	Fg16F/R	X	−	−	X	−	−
F.spp.2333	2011	F. graminearum	Nottinghamshire	seed	Fg16F/R	X	−	−	X	−	−
F.spp.2337	2011	F. graminearum	Sussex	seed	Fg16F/R	X	−	−	X	−	−
F.spp.2339	2011	F. graminearum	Sussex	seed	Fg16F/R	X	−	−	X	−	−
F.spp.2355	2011	F. graminearum	Lincolnshire	seed	Fg16F/R	X	−	−	X	−	−
F.spp.2357	2011	F. graminearum	Lincolnshire	seed	Fg16F/R	X	−	−	X	−	−
F.spp.2360	2011	F. graminearum	Lincolnshire	seed	Fg16F/R	X	−	−	X	−	−
F.spp.2363	2011	F. graminearum	Devon	seed	Fg16F/R	X	−	−	X	−	−
F.spp.2369	2011	F. graminearum	Sussex	seed	Fg16F/R	X	−	−	X	−	−
F.spp.2386	2011	F. graminearum	Devon	seed	Fg16F/R	X	−	−	X	−	−
F.spp.2390	2011	F. graminearum	herefordshire	seed	Data n/a	−	−	X	−	−	X
F.spp.2408	2011	F. graminearum	Nottinghamshire	seed	Fg16F/R	−	−	X	−	−	X
F.spp.2409	2011	F. graminearum	Nottinghamshire	seed	Fg16F/R	−	−	X	−	−	X
F.spp.2411	2011	F. graminearum	Sussex	seed	Fg16F/R	X	−	−	X	−	−
F.spp.2414	2011	F. graminearum	Nottinghamshire	seed	Fg16F/R	X	−	−	X	−	−
F.spp.2434	2011	F. graminearum	Lincolnshire	seed	Fg16F/R	X	−	−	X	−	−
F.spp.2437	2011	F. graminearum	Lincolnshire	seed	Fg16F/R	X	−	−	X	−	−
F.spp.2439	2011	F. graminearum	Nottinghamshire	seed	Fg16F/R	X	−	−	X	−	−
F.spp.2441	2011	F. graminearum	Nottinghamshire	seed	Fg16F/R	X	−	−	X	−	−
F.spp.2452	2011	F. graminearum	Devon	seed	Fg16F/R	−	−	X	−	−	X
F.spp.2467	2011	F. graminearum	Lincolnshire	seed	Fg16F/R	X	−	−	X	−	−
F.spp.2468	2011	F. graminearum	Lincolnshire	seed	Fg16F/R	X	−	−	X	−	−
F.spp.2472	2011	F. graminearum	Devon	seed	Fg16F/R	X	−	−	X	−	−
F.spp.2477	2011	F. graminearum	Sussex	seed	Fg16F/R	X	−	−	X	−	−
F.spp.2479	2011	F. graminearum	Devon	seed	Fg16F/R	X	−	−	X	−	−
F.spp.2483	2011	F. graminearum	Devon	seed	Fg16F/R	X	−	−	X	−	−
F.spp.2485	2011	F. graminearum	Devon	seed	Fg16F/R	−	−	X	−	−	X
F.spp.2490	2011	F. graminearum	Lincolnshire	seed	Data n/a	X	−	−	X	−	−
F.spp.2496	2011	F. graminearum	Devon	seed	Fg16F/R	−	−	X	−	−	X
F.spp.2507	2011	F. graminearum	Shropshire	seed	Fg16F/R	−	−	X	−	−	X
F.spp.2688	2011	F. graminearum	Gloucestershire	stalk	Fg16F/R	X	−	−	X	−	−
F.spp.2945	2011	F. graminearum	Sussex	seed	Fg16F/R	−	−	X	−	−	X
F.spp.3003	2011	F. graminearum	Nottinghamshire	seed	Fg16F/R	X	−	−	X	−	−
F.spp.3010	2011	F. graminearum	Nottinghamshire	seed	Fg16F/R	X	−	−	X	−	−
F.spp.3013	2011	F. graminearum	Nottinghamshire	seed	Fg16F/R	X	−	−	X	−	−
F.spp.3015	2011	F. graminearum	Nottinghamshire	seed	Fg16F/R	X	−	−	X	−	−
F.spp.3029	2011	F. graminearum	Lincolnshire	seed	Fg16F/R	X	−	−	X	−	−
F.spp.3038	2011	F. graminearum	Devon	seed	Fg16F/R	−	−	X	−	−	X
F.spp.3042	2011	F. graminearum	Lincolnshire	seed	Fg16F/R	X	−	−	X	−	−
F.spp.3044	2011	F. graminearum	Nottinghamshire	seed	Fg16F/R	−	−	X	−	−	X
F.spp.3045	2011	F. graminearum	Nottinghamshire	seed	Fg16F/R	−	−	X	−	−	X
F.spp.3060	2011	F. graminearum	Lincolnshire	seed	Fg16F/R	X	−	−	X	−	−
F.spp.3063	2011	F. graminearum	Somerset	seed	Fg16F/R	−	−	X	−	−	X
F.spp.3068	2011	F. graminearum	Devon	seed	Fg16F/R	−	−	X	−	−	X
F.spp.3070	2011	F. graminearum	Somerset	seed	Fg16F/R	X	−	−	X	−	−
F.spp.3078	2011	F. graminearum	Devon	seed	Fg16F/R	−	−	X	−	−	X
F.spp.3084	2011	F. graminearum	Devon	seed	Fg16F/R	−	−	X	−	−	X
F.spp.3090	2011	F. graminearum	Nottinghamshire	seed	Fg16F/R	X	−	−	X	−	−
F.spp.3100	2011	F. graminearum	Devon	seed	Fg16F/R	−	−	X	−	−	X
F.spp.3101	2011	F. graminearum	Devon	seed	Fg16F/R	X	−	−	X	−	−
F.spp.3113	2011	F. graminearum	Nottinghamshire	seed	Fg16F/R	X	−	−	X	−	−
F.spp.3118	2011	F. graminearum	Nottinghamshire	seed	Fg16F/R	X	−	−	X	−	−
F.spp.3130	2011	F. graminearum	Nottinghamshire	seed	Fg16F/R	X	−	−	X	−	−
F.spp.3135	2011	F. graminearum	Nottinghamshire	seed	Fg16F/R	X	−	−	X	−	−
F.spp.3136	2011	F. graminearum	Lincolnshire	seed	Fg16F/R	X	−	−	X	−	−
F.spp.3138	2011	F. graminearum	Nottinghamshire	seed	Fg16F/R	X	−	−	X	−	−
F.spp.3139	2011	F. graminearum	Nottinghamshire	seed	Fg16F/R	X	−	−	X	−	−
F.spp.3143	2011	F. graminearum	Nottinghamshire	seed	Fg16F/R	X	−	−	X	−	−
F.spp.3144	2011	F. graminearum	Nottinghamshire	seed	Fg16F/R	X	−	−	X	−	−
F.spp.3156	2011	F. graminearum	Nottinghamshire	seed	Fg16F/R	X	−	−	X	−	−
F.spp.401	2011	F. graminearum	Sussex	stalk	Fg16F/R	X	−	−	X	−	−
F.spp.402	2011	F. graminearum	Sussex	stalk	Fg16F/R	X	−	−	X	−	−
F.spp.417	2011	F. graminearum	Sussex	stalk	Fg16F/R	X	−	−	X	−	−
F.spp.422	2011	F. graminearum	Sussex	stalk	Fg16F/R	−	−	X	−	−	X
F.spp.425	2011	F. graminearum	Sussex	seed	Fg16F/R	X	−	−	X	−	−
F.spp.428	2011	F. graminearum	Sussex	stalk	Fg16F/R	X	−	−	X	−	−
F.spp.441	2011	F. graminearum	Sussex	stalk	Fg16F/R	X	−	−	X	−	−
F.spp.443	2011	F. graminearum	Sussex	stalk	Fg16F/R	X	−	−	X	−	−
F.spp.444	2011	F. graminearum	Sussex	stalk	Fg16F/R	X	−	−	X	−	−
F.spp.452	2011	F. graminearum	Sussex	stalk	Fg16F/R	X	−	−	X	−	−
F.spp.455	2011	F. graminearum	Sussex	stalk	Fg16F/R	X	−	−	X	−	−
F.spp.457	2011	F. graminearum	Sussex	stalk	Fg16F/R	X	−	−	X	−	−
F.spp.462	2011	F. graminearum	Sussex	stalk	Fg16F/R	X	−	−	X	−	−
F.spp.469	2011	F. graminearum	Gloucestershire	seed	Fg16F/R	X	−	−	X	−	−
F.spp.477	2011	F. graminearum	Gloucestershire	stalk	Fg16F/R	X	−	−	X	−	−
F.spp.510	2011	F. graminearum	Gloucestershire	stalk	Fg16F/R	X	−	−	X	−	−
F.spp.546	2011	F. graminearum	Gloucestershire	stalk	Fg16F/R	X	−	−	X	−	−
F.spp.556	2011	F. graminearum	Gloucestershire	stalk	Fg16F/R	−	−	X	−	−	X
F.spp.558	2011	F. graminearum	Gloucestershire	stalk	Fg16F/R	X	−	−	X	−	−
F.spp.572	2011	F. graminearum	Gloucestershire	seed	Fg16F/R	X	−	−	X	−	−
F.spp.610	2011	F. graminearum	Gloucestershire	seed	Fg16F/R	X	−	−	X	−	−
F.spp.621	2011	F. graminearum	Gloucestershire	seed	Fg16F/R	X	−	−	X	−	−
F.spp.623	2011	F. graminearum	Gloucestershire	seed	Fg16F/R	X	−	−	X	−	−
F.spp.625	2011	F. graminearum	Gloucestershire	seed	Data n/a	X	−	−	X	−	−
F.spp.626	2011	F. graminearum	Gloucestershire	seed	Fg16F/R	X	−	−	X	−	−
F.spp.636	2011	F. graminearum	Oxfordshire	stalk	Fg16F/R	X	−	−	X	−	−
F.spp.639	2011	F. graminearum	Gloucestershire	stalk	Fg16F/R	X	−	−	X	−	−
F.spp.643	2011	F. graminearum	Somerset	stalk	Fg16F/R	−	−	X	−	−	X
F.spp.649	2011	F. graminearum	Somerset	stalk	Fg16F/R	X	−	−	X	−	−
F.spp.651	2011	F. graminearum	Gloucestershire	stalk	Fg16F/R	X	−	−	X	−	−
F.spp.656	2011	F. graminearum	Gloucestershire	stalk	Fg16F/R	X	−	−	X	−	−
F.spp.681	2011	F. graminearum	Somerset	stalk	Fg16F/R	X	−	−	X	−	−
F.spp.689	2011	F. graminearum	Oxfordshire	stalk	Fg16F/R	X	−	−	X	−	−
F.spp.699	2011	F. graminearum	Oxfordshire	stalk	Fg16F/R	X	−	−	X	−	−
F.spp.705	2011	F. graminearum	Gloucestershire	stalk	Fg16F/R	X	−	−	X	−	−
F.spp.709	2011	F. graminearum	Somerset	stalk	Fg16F/R	X	−	−	X	−	−
F.spp.711	2011	F. graminearum	Gloucestershire	stalk	Data n/a	−	−	X	−	−	X
F.spp.715	2011	F. graminearum	Gloucestershire	stalk	Fg16F/R	−	−	X	−	−	X
F.spp.719	2011	F. graminearum	Gloucestershire	stalk	Fg16F/R	X	−	−	X	−	−
F.spp.720	2011	F. graminearum	Somerset	stalk	Fg16F/R	X	−	−	X	−	−
F.spp.725	2011	F. graminearum	Somerset	stalk	Fg16F/R	−	−	X	−	−	X
F.spp.726	2011	F. graminearum	Gloucestershire	stalk	Fg16F/R	X	−	−	X	−	−
F.spp.727	2011	F. graminearum	Gloucestershire	stalk	Fg16F/R	X	−	−	X	−	−
F.spp.729	2011	F. graminearum	Gloucestershire	stalk	Fg16F/R	X	−	−	X	−	−
F.spp.733	2011	F. graminearum	Oxfordshire	stalk	Fg16F/R	X	−	−	X	−	−
F.spp.738	2011	F. graminearum	Gloucestershire	stalk	Fg16F/R	−	−	X	−	−	X
F.spp.758	2011	F. graminearum	Gloucestershire	stalk	Fg16F/R	−	−	X	−	−	X
F.spp.760	2011	F. graminearum	Oxfordshire	stalk	Fg16F/R	X	−	−	X	−	−
F.spp.779	2011	F. graminearum	Yorkshire	stalk	Fg16F/R	X	−	−	X	−	−
F.spp.780	2011	F. graminearum	Yorkshire	stalk	Fg16F/R	X	−	−	X	−	−
F.spp.783	2011	F. graminearum	Yorkshire	stalk	Fg16F/R	X	−	−	X	−	−
F.spp.786	2011	F. graminearum	Yorkshire	stalk	Fg16F/R	X	−	−	X	−	−
F.spp.787	2011	F. graminearum	Yorkshire	stalk	Fg16F/R	X	−	−	X	−	−
F.spp.789	2011	F. graminearum	Yorkshire	stalk	Fg16F/R	X	−	−	X	−	−
F.spp.794	2011	F. graminearum	Yorkshire	stalk	Fg16F/R	X	−	−	X	−	−
F.spp.796	2011	F. graminearum	Yorkshire	stalk	Fg16F/R	X	−	−	X	−	−
F.spp.819	2011	F. graminearum	Yorkshire	stalk	Fg16F/R	X	−	−	X	−	−
F.spp.820	2011	F. graminearum	Yorkshire	stalk	Data n/a	X	−	−	X	−	−
F.spp.824	2011	F. graminearum	Yorkshire	stalk	Fg16F/R	X	−	−	X	−	−
F.spp.825	2011	F. graminearum	Yorkshire	stalk	Fg16F/R	X	−	−	X	−	−
F.spp.831	2011	F. graminearum	Yorkshire	stalk	Fg16F/R	X	−	−	X	−	−
F.spp.849	2011	F. graminearum	Yorkshire	stalk	Fg16F/R	X	−	−	X	−	−
F.spp.858	2011	F. graminearum	Oxfordshire	seed	Fg16F/R	−	−	X	−	−	X
F.spp.863	2011	F. graminearum	Gloucestershire	stalk	Fg16F/R	X	−	−	X	−	−
F.spp.869	2011	F. graminearum	Oxfordshire	seed	Fg16F/R	X	−	−	X	−	−
F.spp.877	2011	F. graminearum	Oxfordshire	seed	Fg16F/R	X	−	−	X	−	−
F.spp.894	2011	F. graminearum	Oxfordshire	seed	Fg16F/R	X	−	−	X	−	−
F.spp.898	2011	F. graminearum	Gloucestershire	seed	Fg16F/R	X	−	−	X	−	−
F.spp.905	2011	F. graminearum	Oxfordshire	seed	Fg16F/R	X	−	−	X	−	−
F.spp.911	2011	F. graminearum	Gloucestershire	seed	Fg16F/R	X	−	−	X	−	−
F.spp.928	2011	F. graminearum	Gloucestershire	seed	Fg16F/R	X	−	−	X	−	−
F.spp.936	2011	F. graminearum	Oxfordshire	seed	Fg16F/R	X	−	−	X	−	−
F.spp.941	2011	F. graminearum	Somerset	seed	Fg16F/R	X	−	−	X	−	−
F.spp.942	2011	F. graminearum	Yorkshire	stalk	Fg16F/R	X	−	−	X	−	−
F.spp.950	2011	F. graminearum	Gloucestershire	seed	Fg16F/R	X	−	−	X	−	−
F.spp.954	2011	F. graminearum	Oxfordshire	seed	Fg16F/R	X	−	−	X	−	−
F.spp.955	2011	F. graminearum	Gloucestershire	seed	Fg16F/R	X	−	−	X	−	−
F.spp.956	2011	F. graminearum	Oxfordshire	stalk	Fg16F/R	X	−	−	X	−	−
F.spp.959	2011	F. graminearum	Yorkshire	stalk	Fg16F/R	X	−	−	X	−	−
F.spp.963	2011	F. graminearum	Yorkshire	stalk	Fg16F/R	X	−	−	X	−	−
F.spp.965	2011	F. graminearum	Yorkshire	stalk	Fg16F/R	X	−	−	X	−	−
F.spp.973	2011	F. graminearum	Yorkshire	stalk	Fg16F/R	X	−	−	X	−	−
F.spp.975	2011	F. graminearum	Yorkshire	stalk	Fg16F/R	X	−	−	X	−	−
F.spp.976	2011	F. graminearum	Yorkshire	stalk	Fg16F/R	X	−	−	X	−	−
F.spp.978	2011	F. graminearum	Yorkshire	stalk	Fg16F/R	X	−	−	X	−	−
F.spp.988	2011	F. graminearum	Yorkshire	stalk	Fg16F/R	X	−	−	X	−	−
F.spp.990	2011	F. graminearum	Yorkshire	stalk	Fg16F/R	X	−	−	X	−	−
F.spp.991	2011	F. graminearum	Yorkshire	stalk	Fg16F/R	X	−	−	X	−	−
F.spp.993	2011	F. graminearum	Oxfordshire	stalk	Fg16F/R	X	−	−	X	−	−
F.spp.3502	2012	F. graminearum	Kent	Stalk	Fg16F/R	X	−	−	X	−	−
F.spp.3508	2012	F. graminearum	Kent	Stalk	Fg16F/R	X	−	−	X	−	−
F.spp.3517	2012	F. graminearum	Kent	Stalk	Fg16F/R	X	−	−	X	−	−
F.spp.3519	2012	F. graminearum	Kent	Stalk	Fg16F/R	X	−	−	X	−	−
F.spp.3524	2012	F. graminearum	Kent	Stalk	Fg16F/R	−	−	X	−	−	X
F.spp.3524	2012	F. graminearum	Kent	Stalk	Fg16F/R	X	−	−	X	−	−
F.spp.3525	2012	F. graminearum	Kent	Stalk	Fg16F/R	X	−	−	X	−	−
F.spp.3536	2012	F. graminearum	Kent	Stalk	Fg16F/R	X	−	−	X	−	−
F.spp.3570	2012	F. graminearum	Kent	Stalk	Fg16F/R	X	−	−	X	−	−
F.spp.3574	2012	F. graminearum	Kent	Stalk	Fg16F/R	X	−	−	X	−	−
F.spp.3576	2012	F. graminearum	Kent	Stalk	Fg16F/R	X	−	−	X	−	−
F.spp.3581	2012	F. graminearum	Kent	Stalk	Fg16F/R	X	−	−	X	−	−
F.spp.3591	2012	F. graminearum	Kent	Stalk	Fg16F/R	X	−	−	X	−	−
F.spp.3597	2012	F. graminearum	Kent	Stalk	Fg16F/R	−	−	X	−	−	X
F.spp.3598	2012	F. graminearum	Kent	Stalk	Fg16F/R	X	−	−	X	−	−
F.spp.3609	2012	F. graminearum	Kent	Stalk	Fg16F/R	X	−	−	X	−	−
F.spp.3616	2012	F. graminearum	Kent	Stalk	Fg16F/R	X	−	−	X	−	−
F.spp.3624	2012	F. graminearum	Kent	Stalk	Fg16F/R	X	−	−	X	−	−
F.spp.3625	2012	F. graminearum	Kent	Stalk	Fg16F/R	−	−	X	−	−	X
F.spp.3632	2012	F. graminearum	Kent	Stalk	Fg16F/R	X	−	−	X	−	−
F.spp.3634	2012	F. graminearum	Kent	Stalk	Fg16F/R	X	−	−	X	−	−
F.spp.3636	2012	F. graminearum	Kent	Stalk	Fg16F/R	X	−	−	X	−	−
F.spp.3639	2012	F. graminearum	Kent	Stalk	Fg16F/R	X	−	−	X	−	−
F.spp.3641	2012	F. graminearum	Kent	Stalk	Fg16F/R	X	−	−	X	−	−
F.spp.3643	2012	F. graminearum	Kent	Stalk	Fg16F/R	X	−	−	X	−	−
F.spp.3651	2012	F. graminearum	Shropshire	Stalk	Fg16F/R	X	−	−	X	−	−
F.spp.3662	2012	F. graminearum	Shropshire	Stalk	Fg16F/R	X	−	−	X	−	−
F.spp.3683	2012	F. graminearum	Shropshire	Stalk	Fg16F/R	X	−	−	X	−	−
F.spp.3684	2012	F. graminearum	Shropshire	Stalk	Fg16F/R	X	−	−	X	−	−
F.spp.3689	2012	F. graminearum	Shropshire	Stalk	Fg16F/R	X	−	−	X	−	−
F.spp.3704	2012	F. graminearum	Shropshire	Stalk	Fg16F/R	X	−	−	X	−	−
F.spp.3706	2012	F. graminearum	Shropshire	Stalk	Fg16F/R	X	−	−	X	−	−
F.spp.3718	2012	F. graminearum	Shropshire	Stalk	Fg16F/R	−	X	−	−	X	−
F.spp.3726	2012	F. graminearum	Shropshire	Stalk	Fg16F/R	X	−	−	X	−	−
F.spp.3744	2012	F. graminearum	Shropshire	Stalk	Fg16F/R	X	−	−	X	−	−
F.spp.3745	2012	F. graminearum	Shropshire	Stalk	Fg16F/R	X	−	−	X	−	−
F.spp.3761	2012	F. graminearum	Shropshire	Stalk	Fg16F/R	X	−	−	X	−	−
F.spp.3764	2012	F. graminearum	Shropshire	Stalk	Fg16F/R	X	−	−	X	−	−
F.spp.3814	2012	F. graminearum	Shropshire	seed	Fg16F/R	X	−	−	X	−	−
F.spp.3816	2012	F. graminearum	Shropshire	seed	Fg16F/R	X	−	−	X	−	−
F.spp.3818	2012	F. graminearum	Shropshire	seed	Fg16F/R	X	−	−	X	−	−
F.spp.3819	2012	F. graminearum	Shropshire	seed	Fg16F/R	X	−	−	X	−	−
F.spp.3863	2012	F. graminearum	Kent	seed	Fg16F/R	X	−	−	X	−	−
F.spp.3897	2012	F. graminearum	Kent	seed	Fg16F/R	X	−	−	X	−	−
F.spp.3929	2012	F. graminearum	Kent	seed	Fg16F/R	X	−	−	X	−	−
F.spp.3957	2012	F. graminearum	Kent	seed	Fg16F/R	X	−	−	X	−	−
F.spp.3967	2012	F. graminearum	Herefordshire	Stalk	Fg16F/R	X	−	−	X	−	−
F.spp.3970	2012	F. graminearum	Herefordshire	Stalk	Fg16F/R	X	−	−	X	−	−
F.spp.3973	2012	F. graminearum	Herefordshire	Stalk	Fg16F/R	X	−	−	X	−	−
F.spp.3979	2012	F. graminearum	Herefordshire	Stalk	Fg16F/R	X	−	−	X	−	−
F.spp.3986	2012	F. graminearum	Herefordshire	Stalk	Fg16F/R	X	−	−	X	−	−
F.spp.3988	2012	F. graminearum	Herefordshire	Stalk	Fg16F/R	X	−	−	X	−	−
F.spp.3990	2012	F. graminearum	Herefordshire	Stalk	Fg16F/R	X	−	−	X	−	−
F.spp.3992	2012	F. graminearum	Herefordshire	Stalk	Fg16F/R	X	−	−	X	−	−
F.spp.3993	2012	F. graminearum	Herefordshire	Stalk	Fg16F/R	X	−	−	X	−	−
F.spp.3994	2012	F. graminearum	Herefordshire	Stalk	Fg16F/R	X	−	−	X	−	−
F.spp.3997	2012	F. graminearum	Herefordshire	Stalk	Fg16F/R	X	−	−	X	−	−
F.spp.4004	2012	F. graminearum	Herefordshire	Stalk	Fg16F/R	X	−	−	X	−	−
F.spp.4008	2012	F. graminearum	Herefordshire	Stalk	Fg16F/R	−	−	X	−	−	X
F.spp.4015	2012	F. graminearum	Herefordshire	Stalk	Fg16F/R	X	−	−	X	−	−
F.spp.4016	2012	F. graminearum	Herefordshire	Stalk	Fg16F/R	X	−	−	X	−	−
F.spp.4020	2012	F. graminearum	Herefordshire	Stalk	Fg16F/R	X	−	−	X	−	−
F.spp.4030	2012	F. graminearum	Herefordshire	Stalk	Fg16F/R	X	−	−	X	−	−
F.spp.4036	2012	F. graminearum	Herefordshire	Stalk	Fg16F/R	−	−	X	−	−	X
F.spp.4040	2012	F. graminearum	Herefordshire	Stalk	Fg16F/R	X	−	−	X	−	−
F.spp.4044	2012	F. graminearum	Herefordshire	Stalk	Fg16F/R	X	−	−	X	−	−
F.spp.4056	2012	F. graminearum	York	Stalk	Fg16F/R	X	−	−	X	−	−
F.spp.4057	2012	F. graminearum	York	Stalk	Fg16F/R	X	−	−	X	−	−
F.spp.4058	2012	F. graminearum	York	Stalk	Fg16F/R	X	−	−	X	−	−
F.spp.4063	2012	F. graminearum	York	Stalk	Fg16F/R	−	−	X	−	−	X
F.spp.4073	2012	F. graminearum	York	Stalk	Fg16F/R	X	−	−	X	−	−
F.spp.4076	2012	F. graminearum	York	Stalk	Fg16F/R	X	−	−	X	−	−
F.spp.4080	2012	F. graminearum	York	Stalk	Fg16F/R	X	−	−	X	−	−
F.spp.4082	2012	F. graminearum	York	Stalk	Fg16F/R	X	−	−	X	−	−
F.spp.4094	2012	F. graminearum	York	Stalk	Fg16F/R	X	−	−	X	−	−
F.spp.4100	2012	F. graminearum	York	Stalk	Fg16F/R	X	−	−	X	−	−
F.spp.4115	2012	F. graminearum	York	Stalk	Fg16F/R	X	−	−	X	−	−
F.spp.4123	2012	F. graminearum	York	Stalk	Fg16F/R	X	−	−	X	−	−
F.spp.4124	2012	F. graminearum	York	Stalk	Fg16F/R	X	−	−	X	−	−
F.spp.4126	2012	F. graminearum	York	Stalk	Fg16F/R	X	−	−	X	−	−
F.spp.4132	2012	F. graminearum	York	Stalk	Fg16F/R	X	−	−	X	−	−
F.spp.4134	2012	F. graminearum	York	Stalk	Fg16F/R	X	−	−	X	−	−
F.spp.4137	2012	F. graminearum	York	Stalk	Fg16F/R	X	−	−	X	−	−
F.spp.4138	2012	F. graminearum	York	Stalk	Fg16F/R	X	−	−	X	−	−
F.spp.4159	2012	F. graminearum	Herefordshire	seed	Fg16F/R	X	−	−	X	−	−
F.spp.4175	2012	F. graminearum	York	seed	Fg16F/R	X	−	−	X	−	−
F.spp.4187	2012	F. graminearum	York	seed	Fg16F/R	X	−	−	X	−	−
F.spp.4189	2012	F. graminearum	York	seed	Fg16F/R	X	−	−	X	−	−
F.spp.4197	2012	F. graminearum	Devon	Stalk	Fg16F/R	X	−	−	X	−	−
F.spp.4202	2012	F. graminearum	Devon	Stalk	Fg16F/R	X	−	−	X	−	−
F.spp.4205	2012	F. graminearum	Devon	Stalk	Fg16F/R	X	−	−	X	−	−
F.spp.4210	2012	F. graminearum	Devon	Stalk	Fg16F/R	X	−	−	X	−	−
F.spp.4212	2012	F. graminearum	Devon	Stalk	Fg16F/R	X	−	−	X	−	−
F.spp.4213	2012	F. graminearum	Devon	Stalk	Fg16F/R	X	−	−	X	−	−
F.spp.4214	2012	F. graminearum	Devon	Stalk	Fg16F/R	X	−	−	X	−	−
F.spp.4218	2012	F. graminearum	Devon	Stalk	Fg16F/R	X	−	−	X	−	−
F.spp.4222	2012	F. graminearum	Devon	Stalk	Fg16F/R	X	−	−	X	−	−
F.spp.4223	2012	F. graminearum	Devon	Stalk	Fg16F/R	X	−	−	X	−	−
F.spp.4225	2012	F. graminearum	Devon	Stalk	Fg16F/R	X	−	−	X	−	−
F.spp.4240	2012	F. graminearum	Devon	Stalk	Fg16F/R	X	−	−	X	−	−
F.spp.4246	2012	F. graminearum	Devon	Stalk	Fg16F/R	X	−	−	X	−	−
F.spp.4252	2012	F. graminearum	Devon	Stalk	Fg16F/R	X	−	−	X	−	−
F.spp.4257	2012	F. graminearum	Devon	Stalk	Fg16F/R	X	−	−	X	−	−
F.spp.4258	2012	F. graminearum	Devon	Stalk	Fg16F/R	X	−	−	X	−	−
F.spp.4273	2012	F. graminearum	Devon	Stalk	Fg16F/R	X	−	−	X	−	−
F.spp.3017	2011a	F. graminearum	Somerset	seed	Fg16F/R	X	−	−	X	−	−
F.spp.3039	2011a	F. graminearum	Lincolnshire	seed	Fg16F/R	X	−	−	X	−	−
F.spp.3064	2011a	F. graminearum	Lincolnshire	seed	Fg16F/R	X	−	−	X	−	−
F.spp.3148	2011a	F. graminearum	Lincolnshire	seed	Fg16F/R	X	−	−	X	−	−

## Sheet: VNTR data
		Allele111	Allele112	Allele113	Allele114	Allele115	Allele116	Allele117	Allele118	Allele119	Allele120	Allele121	Allele122	Allele123	Allele124	Allele125	Allele126	Allele127	Allele128	Allele129	Allele130	Allele131	Allele132	Allele133	Allele134	Allele135	Allele136	Allele137	Allele138	Allele139	Allele140	Allele141	Allele142	Allele143	Allele144	Allele145	Allele146	Allele147	Allele148	Allele149	Allele150	Allele151	Allele152	Allele153	Allele154	Allele155	Allele156
58	1	1	0	1	0	1	0	0	0	0	0	0	1	0	0	0	0	0	0	0	0	-9	-9	-9	-9	-9	-9	-9	1	0	1	1	0	0	1	0	1	0	0	0	0	0	1	1	0	0	0
84	1	0	0	0	0	0	1	1	1	0	0	0	1	0	1	0	0	0	0	0	0	1	0	1	0	0	0	0	0	1	0	1	0	0	1	0	0	-9	-9	-9	-9	0	1	1	0	1	0
101	1	1	0	1	0	0	1	1	1	1	0	1	1	1	1	0	0	0	0	0	0	1	0	0	0	0	1	0	0	1	0	1	1	0	1	1	0	-9	-9	-9	-9	0	0	0	0	1	1
111	1	1	0	1	0	0	1	0	1	1	1	0	0	0	0	1	1	1	1	0	0	0	0	1	0	0	1	0	1	1	0	1	0	0	1	1	1	0	0	1	1	1	1	0	1	1	1
113	1	1	1	1	1	1	0	1	1	1	0	0	0	0	1	0	0	0	0	0	0	1	0	0	0	0	1	0	0	1	0	1	0	0	1	1	1	0	0	0	1	0	1	0	1	1	1
134	1	1	0	1	0	0	1	1	1	0	1	1	1	1	1	0	0	0	0	0	0	1	0	0	0	0	0	0	1	1	0	1	0	0	1	0	0	-9	-9	-9	-9	1	1	0	0	0	1
142	1	1	0	1	0	0	1	1	1	1	1	0	1	1	0	0	0	0	0	0	0	0	0	0	0	1	0	0	0	1	0	1	1	0	1	0	0	-9	-9	-9	-9	0	1	0	1	1	0
152	1	1	0	1	0	0	1	1	1	1	0	1	0	1	0	0	0	0	0	0	0	0	0	1	1	0	0	0	0	1	0	1	1	0	1	1	1	0	0	0	0	0	1	0	0	1	0
152.1	1	-9	-9	-9	-9	0	1	1	1	0	1	0	0	0	1	0	0	0	0	0	0	0	0	0	0	1	0	0	0	0	0	1	0	0	1	1	0	-9	-9	-9	-9	0	1	0	0	1	0
154	1	1	1	1	1	1	1	0	0	1	0	0	0	1	1	0	0	0	0	0	0	0	0	0	0	0	1	0	0	1	0	1	0	1	0	1	0	1	0	1	0	1	0	0	0	1	0
155	1	1	0	1	0	1	0	1	1	1	1	1	1	1	1	0	0	0	0	0	0	1	0	1	0	0	1	0	0	1	0	1	0	0	1	1	1	1	0	1	1	0	1	0	1	1	1
156	1	1	0	1	0	0	1	1	1	1	0	0	1	0	1	0	0	1	0	0	0	0	0	1	1	0	0	0	0	1	0	0	1	0	1	1	0	-9	-9	-9	-9	0	1	0	0	1	1
158	1	1	1	1	1	1	0	0	0	1	0	1	1	1	1	0	0	0	0	0	0	1	0	1	0	0	1	1	1	1	0	1	1	0	0	1	0	0	0	1	0	0	1	1	1	1	0
160	1	1	0	1	0	0	1	1	1	1	0	1	0	0	1	0	0	0	0	0	0	1	0	1	0	0	1	1	0	1	0	1	0	0	1	0	0	-9	-9	-9	-9	1	1	0	0	0	0
168	1	1	0	1	0	0	1	1	1	1	1	0	1	0	1	0	0	0	0	0	0	0	0	0	1	0	1	0	0	1	0	1	1	0	1	0	0	-9	-9	-9	-9	0	1	0	1	1	0
176	1	1	0	1	0	0	1	1	1	1	0	1	1	1	0	0	0	0	0	0	0	1	0	0	0	1	0	0	0	1	0	1	1	0	1	0	0	-9	-9	-9	-9	0	1	0	1	1	0
181	1	1	0	1	0	0	1	1	1	1	0	0	1	0	0	0	0	1	0	0	0	1	1	0	0	0	1	0	0	1	0	1	1	0	1	1	0	0	0	0	1	1	1	1	1	1	1
185	1	1	0	1	0	0	1	1	1	0	0	0	1	0	1	0	0	0	0	0	0	0	0	1	0	0	1	0	0	1	0	1	0	0	1	0	0	0	0	0	1	0	1	0	0	0	0
223	1	1	0	1	0	0	0	1	0	1	1	0	1	0	0	0	0	0	0	0	0	0	0	1	0	0	0	0	0	1	0	1	0	0	1	1	0	0	0	1	1	1	0	0	1	1	0
234	1	1	0	1	0	1	1	1	1	1	0	0	0	0	0	0	0	0	0	0	0	0	0	1	0	0	1	0	1	1	0	1	0	0	1	1	0	0	0	0	1	1	1	1	1	1	0
238	1	0	0	1	0	-9	-9	-9	-9	-9	-9	0	1	1	0	0	0	0	0	0	0	0	0	0	1	0	1	1	1	1	0	0	1	0	1	0	1	0	0	0	0	0	1	0	1	1	0
239	1	1	0	1	1	1	0	0	0	0	1	0	0	0	1	1	0	0	0	0	0	1	0	1	0	0	1	1	1	1	0	1	0	0	1	0	1	0	0	0	0	1	1	0	1	1	0
241	1	1	1	1	0	1	1	1	1	1	0	0	0	0	1	0	0	1	0	0	0	0	0	0	0	0	1	0	0	1	0	1	1	0	1	1	0	0	0	0	1	0	1	0	1	1	0
243	1	1	0	1	0	0	1	1	1	0	1	0	0	0	1	0	0	0	0	0	0	0	1	0	0	0	0	0	0	1	1	1	0	0	1	0	0	-9	-9	-9	-9	0	1	0	0	0	0
247	1	1	0	1	0	0	1	1	1	1	0	0	0	0	1	0	0	0	0	0	0	0	0	0	1	0	1	0	0	1	0	1	1	0	1	1	0	0	0	0	1	0	1	0	1	1	0
280	1	0	0	0	0	1	1	0	0	0	0	-9	-9	-9	-9	-9	-9	-9	-9	-9	-9	0	0	0	0	1	0	0	0	0	1	1	1	0	1	0	0	0	0	1	0	1	1	0	1	0	0
296	1	1	0	1	1	0	1	1	1	1	1	0	0	1	0	0	0	0	0	0	0	0	0	1	0	1	0	0	0	1	0	1	1	0	1	0	0	0	0	1	0	0	1	0	1	1	0
313	1	1	0	1	0	0	1	1	1	1	0	1	0	0	0	0	0	0	0	0	0	0	1	0	0	1	0	0	0	1	0	1	1	0	1	0	0	-9	-9	-9	-9	0	1	0	0	0	0
1	2	1	1	1	1	0	0	0	1	1	1	1	1	0	1	0	0	0	0	0	0	0	1	1	1	0	0	0	1	1	1	1	0	1	0	1	1	0	0	1	1	1	1	1	1	1	0
5	2	1	1	1	0	1	1	0	0	0	1	1	1	1	1	0	0	0	0	0	0	0	1	0	1	0	0	0	1	1	1	1	0	1	0	1	0	0	1	0	1	1	1	1	1	1	1
6	2	1	1	1	1	0	0	0	0	1	0	0	0	0	0	0	0	0	0	1	1	1	1	0	0	0	0	0	1	1	1	1	1	0	0	1	0	0	0	1	1	0	1	1	1	1	0
7	2	1	1	1	1	1	0	0	1	1	1	1	1	1	1	0	0	0	0	0	0	0	1	0	1	1	0	1	1	1	1	1	0	1	0	1	0	0	1	1	1	1	1	1	1	1	0
8	2	1	1	1	1	1	0	0	1	1	1	0	1	1	1	0	0	0	0	0	0	0	0	1	0	0	0	0	1	1	1	0	0	1	0	1	0	0	0	1	1	1	0	1	1	1	0
11	2	1	1	1	1	1	1	0	1	1	1	1	1	1	1	0	0	0	0	0	0	1	0	1	0	0	1	1	1	1	1	1	0	1	0	1	1	0	1	1	1	1	1	1	1	1	1
46	2	1	1	1	0	0	0	0	1	1	1	1	1	1	1	0	0	0	0	0	0	0	0	1	0	0	1	1	1	1	1	1	0	1	0	1	0	1	0	1	0	1	1	1	1	1	1
47	2	0	0	0	0	1	1	0	0	1	1	1	1	1	1	0	0	0	0	0	0	1	0	0	0	0	0	0	0	0	1	1	0	1	0	1	0	1	0	1	0	1	1	1	1	1	1
48	2	1	1	1	0	1	0	0	1	1	1	0	0	0	0	0	0	0	0	0	0	1	0	0	1	0	0	0	1	1	1	1	0	0	1	0	1	1	0	1	0	1	1	1	1	1	0
49	2	1	0	1	0	0	0	0	0	1	1	0	1	0	1	0	0	0	0	0	0	0	1	1	0	0	1	0	0	0	0	0	0	0	1	0	0	0	0	0	1	1	0	0	0	1	1
50	2	0	0	0	0	1	1	0	1	0	0	0	0	0	1	0	0	0	0	0	0	1	0	0	0	0	0	0	1	1	1	0	0	1	0	1	0	1	0	1	0	0	1	1	1	1	0
51	2	1	1	1	1	0	0	0	1	1	1	1	1	1	1	0	0	0	0	0	0	0	0	1	0	0	1	1	0	1	0	0	1	0	0	1	0	0	0	1	0	0	1	1	1	1	1
52	2	1	1	1	1	0	0	1	0	1	1	1	1	1	1	0	0	0	0	0	0	1	1	0	0	0	0	0	0	1	0	1	0	0	0	1	0	0	0	1	0	1	0	0	1	1	0
54	2	1	1	1	1	0	0	0	1	1	1	0	0	0	1	0	0	0	0	0	0	0	0	0	0	0	0	1	1	1	1	1	0	1	0	1	0	0	0	0	1	1	1	1	1	1	0
56	2	0	0	0	0	0	1	0	0	1	1	0	0	0	0	0	0	0	0	1	0	0	0	0	1	0	0	1	0	1	0	0	0	0	1	1	1	0	0	1	1	1	0	0	0	1	0
57	2	1	1	1	0	0	0	0	1	1	1	0	1	1	1	0	0	0	0	0	0	0	1	1	1	0	0	0	1	1	1	0	0	0	1	1	1	0	1	1	1	0	1	1	1	1	0
59	2	1	1	1	0	0	0	1	0	1	1	1	1	1	1	0	0	0	0	0	0	0	0	1	0	0	1	1	-9	-9	-9	-9	1	0	0	1	0	0	1	1	1	1	1	0	0	1	0
61	2	1	1	1	1	0	0	0	1	1	1	1	1	1	1	0	0	0	0	0	0	0	0	0	0	0	0	0	1	1	0	1	0	1	0	1	0	1	0	1	0	1	1	1	1	1	0
62	2	1	1	1	1	1	0	0	1	1	1	1	1	1	1	0	0	0	0	0	0	0	0	1	0	0	1	1	1	1	0	1	0	1	0	1	0	0	1	0	1	0	1	1	1	1	0
63	2	1	1	1	1	-9	-9	-9	-9	-9	-9	1	1	1	1	0	0	0	0	0	0	0	0	0	0	0	1	0	1	1	0	1	1	0	0	1	0	0	1	1	1	0	1	1	1	1	0
64	2	1	1	1	1	0	0	0	0	1	0	1	1	1	1	0	0	0	0	0	0	0	1	1	1	0	0	0	1	1	0	0	1	0	1	1	0	0	0	1	1	1	1	1	1	1	0
65	2	1	1	1	1	1	0	0	0	1	0	0	0	0	0	1	1	1	1	0	0	1	0	0	0	0	0	1	0	0	0	0	0	1	0	1	0	0	1	1	1	1	1	1	1	1	0
66	2	1	1	1	1	0	1	0	1	1	1	1	1	1	1	0	0	0	0	0	0	1	1	0	0	0	0	0	0	1	0	1	0	1	0	1	0	1	0	1	0	1	1	1	1	1	0
67	2	1	1	1	1	1	1	0	0	1	1	1	1	1	1	0	0	0	0	0	0	0	0	1	0	0	1	1	1	1	1	1	0	1	0	1	0	0	1	1	1	0	1	0	1	1	0
68	2	1	1	1	1	1	1	1	0	0	0	1	1	1	1	0	0	0	0	0	0	0	1	1	0	0	1	1	1	1	1	1	0	1	0	1	0	0	0	1	1	0	1	1	1	1	0
69	2	1	1	1	0	0	1	0	1	0	1	0	0	0	0	1	1	1	1	0	0	0	0	0	0	0	0	1	0	0	1	1	0	1	0	1	0	0	1	1	1	0	1	1	1	1	0
70	2	1	1	1	1	1	1	0	0	0	1	1	1	1	1	0	0	0	0	0	0	0	0	0	1	0	0	0	1	1	1	0	0	1	0	1	0	1	0	1	0	0	1	1	1	0	0
71	2	1	1	1	1	0	0	0	1	1	1	0	0	0	0	0	0	0	0	1	1	0	0	0	0	1	0	0	0	0	1	0	0	1	0	1	0	1	0	1	0	0	1	1	1	0	0
72	2	1	1	1	1	0	0	0	1	1	0	0	0	0	0	0	0	0	0	1	1	0	0	1	0	0	1	1	1	1	1	1	0	1	0	1	0	1	0	1	0	1	1	1	1	1	0
73	2	1	1	1	1	0	1	0	0	1	0	0	0	0	0	0	0	0	0	1	1	0	0	0	0	1	0	0	1	1	0	0	1	0	0	1	0	0	0	1	1	0	1	1	1	1	0
74	2	1	1	1	0	0	0	0	1	1	1	0	0	0	0	1	1	1	1	0	0	0	0	1	1	0	0	0	1	1	1	0	1	0	0	1	0	0	0	1	1	1	1	1	1	1	0
75	2	1	1	1	1	1	1	0	0	0	0	1	1	1	1	0	0	0	0	0	0	1	0	0	0	0	0	0	1	0	0	1	1	0	0	1	0	1	0	1	0	1	1	1	1	1	0
76	2	-9	0	0	0	1	1	1	0	0	1	0	1	1	0	0	0	0	0	0	0	0	0	1	0	0	1	0	0	0	1	0	0	0	1	1	0	0	0	1	1	1	1	1	0	1	0
77	2	1	0	1	1	1	1	0	0	1	0	1	1	1	1	0	0	0	0	0	0	1	0	0	0	1	0	0	1	1	1	0	0	0	1	0	1	1	0	1	0	0	1	0	1	0	0
78	2	1	1	1	1	1	0	1	0	1	0	0	0	0	0	0	0	0	0	1	1	1	0	0	0	1	0	0	1	1	1	0	1	0	0	1	1	0	0	1	0	0	1	1	1	1	0
79	2	1	1	1	1	0	0	0	1	1	1	1	1	1	1	0	0	0	0	0	0	0	0	1	0	0	1	1	1	1	1	1	0	1	0	1	0	0	1	1	1	0	0	0	0	0	0
80	2	1	1	1	1	0	0	0	1	1	1	0	1	1	0	0	0	0	0	0	0	0	0	1	0	0	1	1	1	1	0	0	1	0	0	1	0	0	0	1	0	1	1	1	1	1	0
81	2	1	1	1	-9	0	0	0	1	1	1	1	1	1	1	0	0	0	0	0	0	0	0	1	1	0	0	0	-9	-9	-9	-9	0	1	0	1	0	0	0	0	1	1	1	1	1	1	0
82	2	1	1	1	1	0	0	0	1	1	0	1	1	1	1	0	0	0	0	0	0	0	1	1	1	0	0	0	1	1	0	1	0	1	0	1	0	1	0	1	0	0	1	1	1	1	0
83	2	1	1	1	1	1	1	0	0	1	0	1	1	1	1	0	0	0	0	0	0	0	0	1	0	0	1	1	1	1	0	0	0	0	1	1	1	0	0	0	1	0	1	1	1	1	0
86	2	1	1	1	1	1	0	0	0	1	0	1	1	1	1	0	0	0	0	0	0	0	0	0	1	0	0	0	0	0	1	1	0	1	0	1	0	0	0	0	1	1	1	1	1	1	0
87	2	1	1	1	1	0	0	0	1	1	1	0	0	0	0	0	0	0	0	0	0	0	0	1	0	0	1	1	1	0	1	1	0	1	0	1	0	0	0	0	1	1	1	1	1	1	1
88	2	1	1	1	1	1	0	0	1	1	1	1	1	1	1	0	0	0	0	0	0	0	0	1	1	0	0	0	1	1	1	1	0	1	0	1	1	0	0	0	1	1	1	1	1	1	1
89	2	1	1	1	1	0	0	0	1	1	1	0	0	0	0	0	0	0	1	0	0	0	0	1	0	0	1	1	1	0	1	1	0	1	0	1	0	1	0	1	0	0	1	1	1	1	0
91	2	1	1	1	1	0	0	0	1	1	1	1	1	1	1	0	0	0	0	0	0	0	0	1	0	0	1	1	1	1	1	0	0	1	0	1	0	1	0	1	0	1	1	1	1	1	1
92	2	1	0	1	1	0	0	0	1	1	1	1	1	1	1	0	0	0	0	0	0	0	0	1	0	0	1	1	0	1	0	1	0	1	0	1	0	0	0	1	1	0	0	1	1	1	0
93	2	0	0	0	0	-9	-9	-9	-9	-9	-9	0	0	0	0	0	0	0	0	0	0	0	0	0	1	0	1	0	1	1	1	1	0	0	0	1	1	1	0	1	0	0	1	1	1	1	1
94	2	1	1	1	1	1	0	0	1	1	1	0	0	0	0	1	1	1	1	0	0	0	0	1	1	0	0	0	1	1	0	1	0	0	1	0	1	0	1	1	1	1	1	1	1	1	0
95	2	1	1	1	1	1	1	1	0	0	0	1	1	1	1	0	0	0	0	0	0	0	0	1	0	0	1	1	1	0	1	1	0	1	0	1	0	0	0	0	1	1	1	1	1	1	0
96	2	1	0	1	0	0	0	0	1	1	1	0	1	1	0	0	0	0	0	0	0	0	0	1	0	0	1	1	0	1	0	1	0	0	1	1	0	0	0	1	1	0	0	0	1	0	0
97	2	1	1	1	0	1	1	0	0	1	1	1	1	1	1	0	0	0	0	0	0	0	0	1	0	0	1	1	0	1	0	1	0	1	0	1	0	0	1	1	1	1	1	1	1	1	0
99	2	1	1	1	1	0	0	0	1	1	1	0	0	0	1	0	0	0	0	0	0	1	0	0	0	0	0	0	0	1	0	1	0	0	0	1	1	1	0	0	1	0	1	1	1	0	0
100	2	1	1	1	1	0	1	0	1	1	1	1	1	1	1	0	0	0	0	0	0	0	1	1	1	0	0	0	1	1	1	0	0	1	0	1	0	1	0	1	0	1	1	1	1	1	0
102	2	0	0	0	0	0	0	0	0	1	1	0	0	0	1	0	0	0	0	0	0	1	0	0	0	0	1	0	0	1	0	1	0	0	1	1	0	0	0	0	1	1	1	0	1	1	0
103	2	1	1	1	1	0	0	0	1	1	1	1	1	1	1	0	0	0	0	0	0	0	1	1	0	0	1	1	1	1	1	1	0	1	0	1	0	1	0	1	0	0	1	0	1	1	0
104	2	1	1	1	0	0	0	0	1	1	1	1	1	1	1	0	0	0	0	0	0	1	0	0	0	1	0	1	1	1	0	0	0	1	0	1	0	1	0	1	0	0	1	1	1	1	0
106	2	1	1	1	1	0	0	0	0	1	0	1	1	1	1	0	0	0	0	0	0	1	0	1	0	0	1	1	0	0	1	1	0	1	0	1	0	0	1	1	1	1	1	1	1	1	0
107	2	1	1	1	1	1	0	1	0	1	1	1	1	1	1	0	0	0	0	0	0	1	1	1	0	0	1	0	1	1	1	1	1	0	0	1	0	1	0	1	1	1	1	1	1	1	1
108	2	1	1	1	1	0	0	0	1	1	1	1	1	1	1	0	0	0	0	0	0	0	1	0	0	0	0	0	1	1	1	0	0	1	1	1	0	0	1	1	1	1	1	1	1	1	0
110	2	1	1	1	1	0	0	0	1	1	1	1	1	1	1	0	0	0	0	0	0	0	0	0	0	0	1	0	1	1	0	1	0	0	1	0	1	0	0	0	1	1	1	1	1	1	0
112	2	1	1	1	1	0	0	0	1	1	1	0	0	0	0	0	0	0	0	0	0	0	0	1	0	0	1	1	1	1	1	0	0	1	0	1	0	1	0	1	0	1	1	1	1	1	0
114	2	1	1	1	1	1	0	0	1	1	1	0	0	0	0	0	0	0	0	0	0	0	1	1	0	0	1	1	1	1	0	0	0	1	0	1	0	1	0	1	0	0	1	1	1	1	0
115	2	1	1	1	1	0	0	0	1	1	1	1	1	1	1	0	0	0	0	0	0	1	1	0	0	0	0	0	1	1	1	1	0	1	0	1	0	0	1	1	1	1	1	1	1	1	0
116	2	1	1	1	1	0	0	0	0	1	0	1	1	1	1	0	0	0	0	0	0	0	0	0	0	1	0	0	1	1	1	1	0	0	1	1	1	0	0	1	1	1	1	1	1	1	0
117	2	1	1	1	1	0	0	0	1	1	1	1	0	0	0	0	0	0	0	0	0	0	0	1	0	0	1	1	0	1	0	1	0	0	0	1	1	0	0	1	1	0	1	1	1	1	0
118	2	1	1	1	1	1	0	0	1	1	1	1	1	1	1	0	0	0	0	0	0	1	1	0	0	0	0	0	1	1	0	0	1	0	0	1	0	1	0	1	0	1	1	1	1	1	0
119	2	1	1	1	1	1	0	0	1	1	1	1	1	1	1	0	0	0	0	0	0	0	1	0	0	0	0	0	1	1	0	0	1	0	0	1	0	0	0	1	0	0	1	1	0	1	0
120	2	1	1	1	1	0	0	0	1	1	1	1	1	1	1	0	0	0	0	0	0	0	0	0	0	0	1	0	0	1	0	1	0	0	0	1	1	0	1	0	1	0	0	1	1	1	0
121	2	1	1	1	1	0	0	0	0	1	0	1	1	1	1	0	0	0	0	0	0	0	0	1	1	0	0	0	0	0	1	1	0	1	0	1	1	0	1	0	1	1	1	1	1	1	1
122	2	1	1	1	1	-9	-9	-9	-9	-9	-9	1	1	1	1	0	0	0	0	0	0	0	0	1	0	0	1	1	1	1	1	1	1	0	0	1	0	0	0	1	0	1	1	0	0	0	0
123	2	1	1	1	1	0	0	0	1	1	1	0	1	0	1	0	0	0	0	0	0	0	0	0	0	1	0	0	1	1	0	0	0	1	0	1	0	0	1	0	1	0	1	0	1	0	0
124	2	1	1	1	1	0	0	0	1	1	1	0	1	1	1	0	0	0	0	0	0	1	1	0	0	0	0	0	1	1	0	1	0	0	1	1	1	1	0	1	0	0	0	1	1	1	0
125	2	1	1	1	1	0	1	0	1	1	1	0	0	0	0	1	1	1	1	0	0	0	1	1	1	0	0	0	1	1	0	0	0	0	1	0	1	0	1	1	1	1	1	1	1	1	0
126	2	1	1	1	1	0	0	0	1	1	1	0	0	0	0	1	1	1	1	0	0	0	1	1	1	0	0	0	1	1	1	1	0	0	1	1	1	0	1	1	1	1	1	1	1	1	0
127	2	1	1	1	1	1	1	0	0	1	0	0	0	0	0	1	1	1	1	0	0	0	0	1	0	0	1	1	1	1	0	0	1	0	0	1	0	0	0	1	0	0	1	1	1	1	1
128	2	0	0	0	0	1	1	0	0	1	1	0	0	0	0	0	0	0	0	0	0	0	0	1	0	0	1	1	1	1	1	1	0	0	1	1	1	0	1	1	1	0	1	1	1	1	1
129	2	1	0	1	1	0	0	0	1	1	1	0	0	0	0	0	0	0	0	0	0	1	0	0	0	0	1	0	0	1	1	1	0	0	1	0	1	1	0	1	0	0	1	1	1	1	0
130	2	1	1	1	1	1	0	0	1	1	1	1	1	1	1	0	0	0	0	0	0	1	0	1	0	0	0	0	1	1	1	0	0	0	0	1	0	0	1	1	1	1	1	1	1	1	0
131	2	1	1	1	1	1	0	0	1	1	1	1	1	1	1	0	0	0	0	0	0	0	0	1	0	0	0	1	1	1	0	1	0	1	0	1	0	0	1	1	1	1	1	1	1	1	0
132	2	1	1	1	0	0	0	0	1	1	1	1	1	1	1	0	0	0	0	0	0	0	0	1	0	0	0	1	1	0	1	1	0	0	1	0	1	1	0	1	1	0	1	1	1	1	0
133	2	1	1	1	0	1	0	0	1	1	1	0	0	0	0	0	0	0	0	0	0	0	0	1	0	0	0	1	0	1	0	1	0	0	1	1	1	1	0	1	0	0	0	1	1	1	0
136	2	1	0	1	1	0	0	0	1	1	1	0	0	0	0	0	0	0	0	0	0	0	0	0	0	0	0	0	0	1	0	1	0	0	1	0	1	1	0	1	0	1	1	1	1	1	0
137	2	1	1	1	1	1	0	0	1	1	1	1	1	1	1	0	0	0	0	0	0	0	1	1	0	0	1	1	1	1	1	1	0	1	0	1	0	0	0	1	0	0	1	1	1	1	0
138	2	1	1	1	1	1	0	0	1	1	1	0	0	0	0	0	0	0	0	0	0	0	1	1	1	0	0	0	1	1	0	1	0	1	0	1	0	1	0	1	1	1	1	1	1	1	0
139	2	1	1	1	1	1	1	0	1	1	1	0	1	1	1	0	0	0	0	0	0	0	0	0	0	1	0	0	-9	-9	-9	-9	0	1	0	1	0	0	1	1	1	1	1	1	1	1	1
140	2	1	1	1	1	0	0	0	1	1	1	1	1	1	1	0	0	0	0	0	0	0	1	0	0	1	0	0	1	1	1	1	0	1	0	1	0	0	1	0	1	1	1	1	1	1	0
143	2	1	1	1	1	0	1	0	1	1	1	1	0	0	0	0	0	0	0	0	0	1	0	0	0	0	0	0	1	1	0	1	0	1	0	1	1	1	0	1	0	0	1	1	1	1	0
144	2	1	1	1	0	0	0	0	1	1	1	0	0	0	0	1	1	1	1	0	0	0	0	0	0	0	1	0	1	1	1	1	0	0	1	1	1	0	1	1	1	1	1	1	1	1	0
145	2	0	0	0	0	1	1	0	0	1	0	0	0	0	0	0	0	0	0	0	0	0	1	1	1	0	0	0	1	1	1	1	0	0	0	1	0	0	0	1	0	1	1	1	1	1	0
146	2	1	1	1	1	0	0	0	1	1	1	0	1	1	0	0	0	0	0	0	0	1	0	0	0	0	0	0	1	1	0	1	0	0	1	1	1	0	1	1	1	1	1	1	1	1	1
147	2	1	1	1	1	1	1	1	0	1	0	1	1	1	1	0	0	0	0	0	0	0	1	1	1	0	1	0	1	1	0	0	0	0	1	1	1	1	0	1	0	0	1	1	1	1	0
148	2	1	1	1	1	1	0	0	1	1	1	1	1	1	1	0	0	0	0	0	0	1	1	0	0	0	1	0	1	1	0	1	0	1	0	1	0	0	1	1	1	1	1	1	1	1	0
149	2	1	1	1	1	0	0	0	1	1	1	1	1	1	1	0	0	0	0	0	0	1	1	1	0	0	0	0	0	0	1	1	0	0	1	1	1	0	1	1	1	1	1	1	1	1	1
150	2	1	1	1	1	0	0	0	1	1	1	1	1	1	0	0	0	0	0	0	0	0	1	0	0	0	0	0	1	1	1	1	0	1	0	1	0	0	1	1	1	1	1	1	1	1	0
151	2	1	0	1	0	0	0	0	1	1	1	1	0	0	0	0	0	0	0	0	0	-9	-9	-9	-9	-9	-9	-9	1	1	0	1	1	0	0	1	0	0	0	1	0	1	1	1	1	1	0
153	2	1	1	1	1	0	0	0	1	1	1	0	0	1	0	0	0	0	0	0	0	0	1	0	0	1	0	0	1	1	0	0	0	1	0	1	0	1	0	1	0	1	1	1	1	1	0
157	2	1	1	1	1	1	1	0	0	0	0	0	1	1	1	0	0	0	0	0	0	0	0	1	1	0	0	0	1	1	0	0	0	1	0	1	0	0	0	1	1	0	1	1	1	0	0
159	2	1	1	1	1	0	0	0	1	1	1	1	1	1	1	0	0	0	0	0	0	0	0	1	0	0	1	1	1	1	0	1	0	1	0	1	0	1	0	1	0	1	1	1	1	1	0
162	2	1	1	1	1	0	1	1	1	1	1	0	0	0	0	0	0	0	0	0	0	0	0	0	0	0	0	1	1	1	1	1	0	0	1	0	1	0	0	1	0	1	1	1	1	1	0
166	2	1	1	1	1	0	0	0	1	1	1	1	1	1	1	0	0	0	0	0	0	0	0	1	0	0	1	1	1	1	0	1	0	1	0	1	0	0	0	0	1	0	1	0	1	1	0
167	2	1	1	1	1	0	1	1	1	1	1	1	1	1	1	0	0	0	0	0	0	0	0	0	0	0	1	0	1	1	0	1	0	1	1	1	0	0	0	1	1	0	1	1	1	1	0
169	2	1	1	1	1	0	0	0	1	1	0	1	1	1	1	0	0	0	0	0	0	0	0	1	0	0	1	1	1	1	0	1	0	1	0	1	1	0	1	1	1	1	1	1	1	1	1
170	2	1	1	1	1	0	0	1	0	1	0	1	1	1	1	0	0	0	0	0	0	0	0	1	0	0	1	1	0	1	0	1	0	1	0	1	0	0	0	1	1	1	1	1	1	1	1
171	2	1	1	1	0	0	0	0	1	0	1	0	0	0	0	0	0	0	0	1	1	0	0	0	1	0	0	1	0	1	0	1	0	1	0	1	0	1	0	1	0	1	1	1	1	1	0
172	2	1	1	1	1	0	0	0	1	1	1	1	1	1	1	0	0	0	0	0	0	0	0	1	0	0	1	1	0	0	0	1	0	1	0	1	0	0	0	0	1	0	1	1	1	1	0
173	2	1	1	1	1	0	0	0	1	1	0	1	1	1	1	0	0	0	0	0	0	0	0	1	0	0	1	1	1	1	0	0	0	1	1	1	0	1	0	1	0	0	1	1	1	1	0
174	2	1	1	1	1	0	0	0	1	1	0	1	1	1	1	0	0	0	0	0	0	0	0	1	1	0	0	0	1	1	0	0	0	1	0	1	1	1	0	1	0	1	1	1	1	1	0
175	2	1	1	1	0	0	0	0	1	0	1	1	1	1	1	0	0	0	0	0	0	0	1	1	1	0	0	0	1	1	1	1	1	0	1	0	0	1	0	1	0	1	1	1	1	1	0
177	2	1	1	1	1	0	0	0	1	1	1	1	1	0	1	0	0	0	0	0	0	0	0	1	0	0	1	1	1	1	0	1	0	1	0	1	0	1	0	1	0	0	1	0	1	0	0
178	2	0	0	0	0	0	1	1	1	0	0	0	1	0	0	0	1	1	0	0	0	0	0	1	0	0	0	0	0	1	0	1	0	0	1	1	0	-9	-9	-9	-9	0	1	0	1	0	0
179	2	1	0	1	0	0	0	0	1	1	1	1	1	1	1	0	0	0	0	0	0	0	0	1	0	0	1	1	1	1	0	0	0	1	0	1	0	0	0	0	1	1	1	1	1	1	0
182	2	1	1	1	1	0	0	0	1	1	1	1	1	1	1	0	0	0	0	0	0	0	0	1	0	0	1	1	0	1	0	1	0	1	0	1	0	1	0	1	0	1	1	1	1	1	0
184	2	1	1	1	1	0	0	0	1	1	1	1	1	1	1	0	0	0	0	0	0	0	1	1	0	0	0	0	1	1	0	1	0	1	0	1	0	0	1	1	1	1	1	1	1	1	0
186	2	1	1	1	1	0	0	0	1	1	1	0	0	0	0	0	0	0	0	0	0	0	0	0	0	1	0	0	1	1	0	1	1	0	0	1	0	0	0	1	1	1	1	1	1	1	0
188	2	1	1	1	1	0	0	0	1	1	1	0	0	0	0	0	0	1	1	0	0	0	0	1	1	0	0	0	0	1	0	0	0	1	0	1	1	0	1	1	1	0	1	1	1	0	0
189	2	1	1	1	1	0	0	0	1	1	1	0	0	0	0	0	0	1	1	0	0	0	1	1	1	0	0	1	1	1	0	1	0	1	0	1	0	0	1	1	1	0	1	1	1	1	0
190	2	1	1	1	1	1	0	0	1	1	1	1	1	0	0	0	0	0	0	0	0	0	0	1	1	0	0	1	1	1	0	1	0	1	0	1	0	0	0	0	1	1	1	1	1	1	0
191	2	0	0	1	0	1	0	0	0	1	1	1	0	1	0	0	0	0	0	0	0	-9	-9	-9	-9	-9	-9	-9	0	1	0	1	0	0	1	1	0	0	0	1	1	1	0	1	1	1	1
194	2	1	0	1	0	0	1	0	0	1	1	0	1	0	1	0	0	0	0	0	0	-9	-9	-9	-9	-9	-9	-9	0	1	0	1	0	0	0	1	0	0	0	1	1	1	1	1	1	1	0
195	2	0	0	0	0	0	0	0	1	1	1	1	1	1	1	0	0	0	0	0	0	0	0	0	1	0	1	0	1	1	1	0	0	0	1	0	1	1	0	1	0	1	1	1	1	0	0
196	2	1	1	1	1	0	0	0	1	1	1	1	1	0	0	0	0	0	0	0	0	0	1	1	0	0	1	1	1	1	1	0	0	1	0	1	0	1	0	1	0	1	1	1	1	1	0
198	2	1	1	1	1	0	0	0	1	1	1	1	1	1	0	0	0	0	0	0	0	0	0	1	0	0	0	0	1	1	0	0	0	1	0	1	0	0	0	1	1	0	1	1	1	1	0
199	2	1	1	1	1	1	0	0	1	1	1	1	1	1	1	0	0	0	0	0	0	0	1	1	1	0	0	0	1	1	1	1	0	1	0	1	1	0	0	1	1	1	1	1	1	1	0
202	2	0	0	1	0	0	0	0	1	1	1	0	0	0	0	0	0	0	0	0	0	0	0	1	1	0	0	0	1	1	1	1	0	1	0	1	0	1	0	1	0	1	1	1	1	1	1
203	2	1	1	1	0	0	0	1	0	1	0	1	1	1	1	0	0	0	0	0	0	0	1	1	0	0	0	0	1	1	0	0	1	0	0	1	0	0	0	1	0	1	1	1	1	1	0
204	2	1	0	1	0	0	0	1	0	1	0	1	1	1	1	0	0	0	0	0	0	0	1	0	1	0	0	0	1	1	0	1	1	0	0	1	0	0	0	1	0	0	1	0	0	1	0
207	2	1	1	1	1	0	0	1	0	1	1	0	0	0	0	1	1	1	1	0	0	1	0	1	0	0	1	1	0	1	0	1	0	0	0	1	1	1	0	0	1	1	1	0	1	1	1
208	2	1	1	1	1	0	0	0	0	1	0	1	1	1	1	0	0	0	0	0	0	0	1	1	0	0	0	0	1	1	0	0	-9	-9	-9	-9	-9	1	0	1	0	0	1	1	1	1	0
209	2	0	0	0	0	0	0	0	1	1	1	1	1	1	1	0	0	0	0	0	0	0	0	1	0	0	1	1	0	0	1	0	0	1	0	1	0	0	1	0	1	1	1	1	1	1	0
212	2	1	1	1	0	0	0	0	1	1	1	0	0	0	0	0	0	0	0	0	0	-9	-9	-9	-9	-9	-9	-9	1	0	1	0	1	0	0	1	0	0	0	1	0	1	1	1	1	1	0
213	2	1	1	1	1	0	0	0	1	1	1	0	0	0	0	0	0	0	0	0	0	1	1	0	0	1	0	0	1	1	1	1	1	0	0	1	0	0	0	1	0	1	1	1	1	1	0
214	2	1	1	1	1	0	0	0	1	1	1	1	1	1	1	0	0	0	0	0	0	0	0	0	0	1	0	0	1	1	0	1	1	0	0	1	0	0	0	1	0	1	1	1	1	1	0
215	2	0	0	0	0	0	0	0	0	0	1	-9	-9	-9	-9	-9	-9	-9	-9	-9	-9	0	1	1	0	0	1	1	1	1	1	1	0	0	1	1	0	0	0	1	1	0	0	0	0	1	0
216	2	1	0	1	0	1	0	0	1	1	1	1	1	1	1	0	0	0	0	0	0	0	0	1	0	0	1	1	0	1	1	1	0	1	0	1	0	0	0	0	1	0	1	1	1	1	0
217	2	1	1	1	1	1	1	0	0	1	0	0	0	0	0	0	0	0	0	0	0	0	0	1	0	0	1	0	1	1	0	1	0	1	0	1	0	1	0	1	1	1	1	1	1	1	0
218	2	1	1	1	1	0	0	0	1	1	1	0	1	1	0	0	0	0	0	0	0	0	0	1	0	0	1	1	0	1	0	1	0	0	0	1	0	0	1	1	1	1	0	0	1	1	0
220	2	0	0	0	0	0	0	0	1	1	1	1	1	1	1	0	0	0	0	0	0	0	0	1	0	0	1	1	0	1	1	1	0	1	0	1	0	0	1	1	1	1	1	1	1	1	0
221	2	1	1	1	1	0	0	0	1	1	1	1	1	1	1	0	0	0	0	0	0	0	0	1	0	0	1	1	0	0	1	1	1	0	0	1	0	1	0	0	1	1	1	1	1	1	0
224	2	1	1	1	0	1	1	0	0	1	0	1	1	1	1	0	0	0	0	0	0	0	0	1	0	0	1	0	1	0	1	1	0	1	0	1	0	1	0	1	0	1	1	1	0	1	1
226	2	1	1	1	1	1	1	0	0	0	1	0	0	0	0	1	1	1	0	0	0	0	0	1	0	0	1	1	0	0	1	1	0	1	0	1	0	0	1	1	1	1	1	1	1	1	0
227	2	1	0	1	1	0	0	0	1	1	1	0	0	0	0	0	0	0	0	0	0	0	0	1	0	0	0	0	1	1	0	1	0	0	0	1	0	0	0	1	0	0	0	1	1	1	0
228	2	1	1	1	1	0	0	0	1	1	1	0	0	0	0	0	0	0	0	0	0	0	1	1	1	0	0	0	1	1	1	0	0	1	0	1	0	1	0	1	0	1	1	1	1	1	0
229	2	1	0	1	0	0	0	0	1	1	1	1	1	1	1	0	0	0	0	0	0	0	0	1	1	0	0	0	1	1	0	0	1	0	0	1	0	0	0	1	1	1	1	1	1	1	1
230	2	1	0	1	0	0	0	0	0	1	1	1	1	0	0	0	0	0	0	0	0	1	1	1	0	0	1	0	0	1	0	1	0	1	0	1	0	0	0	1	1	1	0	0	1	1	0
231	2	1	1	1	1	1	1	0	0	0	1	0	1	1	0	0	0	0	0	0	0	0	0	1	0	0	1	1	1	0	1	1	0	1	0	1	0	0	0	0	1	1	1	1	1	1	0
232	2	1	1	1	1	0	0	0	1	1	1	0	0	0	0	0	0	0	0	0	0	0	0	1	0	0	1	0	1	1	0	1	0	1	0	1	0	1	0	1	0	0	1	1	1	1	0
233	2	1	0	1	1	0	0	0	1	1	1	0	1	1	1	0	0	0	0	0	0	0	0	1	1	0	1	0	1	1	0	1	0	1	0	1	0	1	0	1	1	1	1	1	1	1	0
240	2	1	1	1	1	0	0	0	0	0	1	1	1	1	1	0	0	0	0	0	0	0	0	1	0	0	1	1	0	0	1	1	0	1	0	1	0	-9	-9	-9	-9	1	1	1	1	1	0
244	2	1	1	1	1	0	0	0	1	1	1	1	1	1	1	0	0	0	0	0	0	0	0	1	0	0	1	1	1	1	1	0	0	1	0	1	0	1	0	1	0	1	1	1	1	1	0
248	2	1	1	1	0	0	0	0	1	1	1	1	1	1	1	0	0	0	0	0	0	0	0	0	1	0	1	0	1	1	0	1	0	1	1	1	0	0	0	0	1	0	0	0	1	1	0
249	2	1	1	1	1	-9	-9	-9	-9	-9	-9	1	1	1	1	0	0	0	0	0	0	1	0	0	0	0	1	0	0	0	1	1	0	0	0	1	1	1	0	1	1	1	1	1	1	1	0
252	2	1	1	1	1	0	0	1	0	1	1	0	0	0	0	1	1	0	0	0	0	0	1	1	1	0	0	0	0	1	0	0	0	0	0	1	0	0	0	0	1	1	0	0	1	1	0
255	2	1	1	1	1	0	0	0	1	1	1	0	0	0	0	1	1	1	0	0	0	0	1	0	0	0	1	0	1	1	0	0	0	1	0	1	0	0	1	1	1	0	0	1	1	1	0
256	2	1	1	1	1	0	0	0	1	1	1	1	1	1	1	0	0	0	0	0	0	0	1	1	1	0	1	0	1	1	1	1	0	1	0	1	0	0	0	1	0	0	1	1	1	1	0
257	2	1	0	1	0	0	1	1	1	1	0	-9	-9	-9	-9	-9	-9	-9	-9	-9	-9	0	0	0	1	0	0	0	0	1	0	1	1	0	1	0	0	0	0	0	0	1	1	1	1	1	1
258	2	1	1	1	1	0	0	0	1	1	1	1	1	1	1	0	0	0	0	0	0	0	1	0	0	0	0	0	1	1	1	0	0	1	0	1	0	0	1	1	1	1	1	1	1	1	0
261	2	1	1	1	1	0	0	0	1	1	1	0	1	1	1	0	0	0	0	0	0	0	0	1	1	0	0	0	0	0	1	0	0	0	1	1	0	0	1	1	1	1	1	1	1	1	1
265	2	1	1	1	1	1	0	0	1	1	1	0	0	0	0	0	0	1	1	0	0	0	1	0	0	0	0	0	1	1	1	1	0	1	0	1	0	0	1	1	1	1	1	1	1	1	1
266	2	1	1	1	1	0	0	0	1	1	1	0	0	0	0	0	0	0	0	0	0	0	0	0	0	0	1	1	1	1	1	1	0	1	0	1	0	0	1	1	1	1	1	1	1	1	0
268	2	1	1	1	1	1	0	0	1	1	1	1	1	1	1	0	0	0	0	0	0	0	1	0	1	0	0	0	1	1	1	1	1	0	0	1	1	0	0	0	0	1	1	1	1	1	1
270	2	1	1	1	1	1	1	0	0	1	0	1	1	1	1	0	0	0	0	0	0	1	0	0	0	0	0	0	1	1	1	1	0	1	1	1	0	0	0	0	1	1	1	1	1	1	0
272	2	1	0	1	0	0	0	0	1	1	1	0	0	0	0	0	0	0	0	0	0	0	0	1	0	0	1	1	-9	-9	-9	-9	0	0	0	1	0	0	0	1	1	1	1	1	1	1	0
273	2	1	0	1	0	1	0	0	0	1	1	0	0	0	0	0	0	0	0	0	0	0	0	1	0	0	1	1	0	1	0	1	0	1	0	1	0	-9	-9	-9	-9	1	1	1	1	1	0
274	2	0	0	0	0	0	0	0	1	1	1	0	1	0	0	0	0	0	0	0	0	0	0	1	0	0	1	1	0	1	0	1	0	1	0	1	1	0	0	0	1	1	1	1	1	1	0
276	2	1	0	1	0	0	1	0	0	0	1	0	0	0	1	0	0	0	0	0	0	0	1	0	0	1	1	0	0	1	0	1	0	0	1	1	0	0	0	1	1	1	1	0	0	1	0
277	2	1	0	1	0	0	0	0	1	1	1	0	0	0	0	0	0	0	0	0	0	0	0	0	0	0	1	0	1	1	0	0	0	0	0	1	0	1	0	1	0	1	1	1	1	1	1
282	2	1	1	1	0	0	0	0	1	1	1	0	1	1	0	0	0	0	0	0	0	0	0	0	1	0	1	0	0	0	1	1	0	1	0	1	0	0	1	1	1	1	1	1	1	1	0
283	2	1	1	1	1	0	1	0	1	1	1	1	1	1	1	0	0	0	0	0	0	0	1	1	1	0	0	0	1	1	1	1	0	1	0	1	0	1	0	1	0	1	1	1	1	1	1
284	2	1	1	1	1	0	0	0	1	1	1	1	1	1	1	0	0	0	0	0	0	0	1	0	1	0	0	0	1	1	1	1	0	1	0	1	0	1	0	1	0	1	1	1	1	1	1
285	2	1	1	1	0	0	0	0	1	1	1	0	1	1	0	0	0	0	0	0	0	0	0	1	0	0	0	1	1	1	1	1	0	1	0	1	0	0	1	1	1	0	0	0	1	1	1
286	2	1	1	1	1	1	0	0	0	1	0	1	1	1	1	0	0	0	0	0	0	0	0	1	0	0	1	0	0	0	1	1	0	1	0	1	0	0	1	0	1	1	1	1	1	1	0
287	2	1	1	1	1	0	0	0	1	1	1	1	1	1	1	0	0	0	0	0	0	0	1	0	0	1	0	0	1	1	1	0	0	1	0	1	0	0	1	1	1	1	1	1	1	1	0
288	2	1	1	1	1	0	0	0	1	1	1	1	1	1	1	0	0	0	0	0	0	0	0	1	0	0	1	1	1	0	1	1	-9	-9	-9	-9	-9	0	0	0	1	1	1	1	1	1	0
289	2	1	1	1	1	0	0	0	1	1	1	1	1	1	1	0	0	0	0	0	0	0	1	1	1	0	1	0	1	1	1	1	1	0	1	1	0	0	1	1	1	1	1	1	1	1	0
291	2	1	1	1	1	0	0	0	1	1	1	0	0	0	0	1	1	1	1	0	0	0	0	1	0	0	0	1	1	1	1	1	0	0	1	0	1	0	1	1	1	0	1	0	0	1	1
293	2	1	0	1	1	0	0	0	1	1	1	0	0	0	0	0	0	0	0	0	0	0	0	1	0	0	1	1	0	0	1	0	1	0	0	1	0	0	0	1	0	0	1	1	1	1	0
294	2	1	0	1	1	0	0	0	1	1	1	0	0	1	0	0	0	0	0	0	0	0	1	1	0	0	1	1	1	1	0	0	1	0	0	1	0	0	0	1	0	0	1	1	1	1	0
295	2	1	0	1	1	0	1	0	0	0	1	0	0	1	0	0	0	0	0	0	0	1	1	0	1	0	1	1	0	1	0	1	0	0	1	1	0	0	0	1	1	1	0	0	1	1	0
297	2	0	0	1	0	1	1	0	0	0	0	0	0	1	0	0	0	0	0	0	0	0	1	0	1	0	0	0	0	0	0	1	1	0	1	0	0	-9	-9	-9	-9	1	0	0	0	0	0
298	2	1	1	1	0	1	0	1	0	1	1	0	0	0	0	0	0	0	0	0	0	0	1	1	1	0	0	0	0	1	0	1	0	0	0	1	0	0	0	1	0	0	1	0	1	1	0
299	2	1	1	1	1	0	0	1	0	1	1	1	1	1	1	0	0	0	0	0	0	0	1	1	0	0	1	1	0	1	0	1	0	0	0	1	0	0	0	1	1	1	1	1	1	1	1
300	2	1	1	1	1	0	0	0	1	1	1	0	0	0	0	1	1	1	1	0	0	0	0	0	0	0	0	1	1	0	0	0	1	0	0	1	0	1	0	1	1	1	1	1	1	1	0
301	2	1	1	1	1	0	0	1	0	1	1	1	1	1	1	0	0	0	0	0	0	1	0	1	0	0	1	1	0	1	0	1	0	0	0	1	1	0	0	1	1	1	1	1	1	1	0
302	2	1	1	1	1	1	0	0	1	1	1	1	1	1	1	0	0	0	0	0	0	0	1	0	0	0	0	0	1	1	1	1	0	1	0	1	0	0	0	1	1	1	1	1	1	1	0
303	2	1	1	1	1	1	1	0	0	0	0	0	0	0	0	1	1	1	1	0	0	0	0	1	0	0	1	1	0	1	0	1	1	0	0	1	0	1	0	1	1	1	1	1	1	1	0
304	2	0	0	1	0	0	0	0	0	1	1	-9	-9	-9	-9	-9	-9	-9	-9	-9	-9	0	0	0	0	0	0	1	0	0	1	1	0	0	1	1	0	0	0	0	1	1	0	1	0	1	0
305	2	1	1	1	1	0	0	0	1	1	1	0	0	1	0	0	0	0	0	0	0	0	0	0	0	1	0	0	1	1	1	1	0	1	0	1	0	1	0	1	0	0	1	1	1	1	0
306	2	1	1	1	1	0	0	0	1	1	1	1	1	1	1	0	0	0	0	0	0	0	1	0	0	0	0	0	1	1	1	1	0	1	0	1	0	1	0	1	0	0	1	1	1	1	0
307	2	1	1	1	1	1	1	0	1	1	1	0	0	0	1	0	0	0	0	0	0	1	1	1	0	0	0	0	1	1	1	1	0	1	0	1	0	0	1	1	1	0	1	1	1	0	0
308	2	1	1	1	1	1	1	0	1	1	0	0	0	0	0	0	0	0	0	0	0	0	0	0	0	0	0	1	0	0	1	1	0	1	0	1	0	1	0	1	0	0	1	1	1	1	0
309	2	1	1	1	1	1	0	1	0	1	0	1	0	0	0	0	0	0	0	0	0	0	0	1	0	0	1	1	1	1	1	1	0	1	0	1	0	1	0	1	0	1	1	1	1	1	0
310	2	1	1	1	1	1	1	0	0	1	0	1	1	1	1	0	0	0	0	0	0	0	1	0	0	0	0	0	1	1	1	1	0	1	0	1	0	1	0	1	0	0	1	1	1	1	0
311	2	1	1	1	1	1	1	0	0	1	1	1	1	1	1	0	0	1	1	0	0	0	1	0	1	0	0	1	1	1	1	1	1	0	0	1	1	1	0	1	1	0	1	1	1	1	0
312	2	1	0	1	1	0	0	0	1	1	1	0	0	0	0	0	0	0	0	0	0	-9	-9	-9	-9	-9	-9	-9	0	1	0	1	0	0	1	0	0	0	1	0	1	1	0	0	0	0	1
313.1	2	-9	-9	-9	-9	1	0	1	0	1	1	1	1	1	1	0	0	0	0	0	0	0	1	0	0	1	0	0	0	1	0	1	1	0	0	1	0	0	0	1	1	1	1	1	1	1	1
314	2	1	1	1	1	0	0	0	1	1	1	1	1	1	1	0	0	0	0	0	0	0	1	1	0	0	1	1	1	1	0	1	0	1	0	1	0	0	0	0	1	1	1	1	1	1	1
315	2	0	0	0	0	0	0	0	1	1	1	1	1	1	1	0	0	0	0	0	0	1	0	1	0	0	1	1	0	0	1	1	0	1	0	1	0	0	1	1	1	1	1	1	1	1	0
316	2	1	1	1	1	1	1	0	1	1	0	0	0	0	0	1	1	1	1	0	0	1	0	1	0	0	1	1	0	1	0	1	1	0	0	1	0	1	0	1	1	1	1	1	1	1	1
317	2	1	1	1	1	0	0	0	0	0	0	1	1	1	1	0	0	0	0	0	0	0	0	1	0	0	1	1	1	1	1	0	0	0	1	0	1	0	0	1	1	0	0	0	1	0	0
318	2	1	0	1	0	0	0	0	1	1	1	0	0	0	0	1	1	1	1	0	0	0	0	0	0	0	0	1	0	1	0	1	0	0	0	1	1	0	0	1	1	0	0	0	0	1	0
319	2	1	1	1	1	0	0	0	1	1	1	0	0	0	0	0	0	0	0	0	0	1	0	0	0	0	1	0	1	1	1	0	1	0	0	1	0	0	0	1	1	1	1	1	1	1	0
320	2	1	1	1	1	1	0	0	1	1	1	0	0	0	0	0	0	0	0	0	0	1	0	0	0	0	0	1	1	1	1	0	0	0	1	0	1	1	0	1	0	0	1	1	1	0	0
321	2	1	1	1	1	1	1	0	0	0	1	1	1	1	1	0	0	0	0	0	0	0	1	0	0	0	0	0	1	1	1	0	0	1	0	1	0	0	1	1	1	1	1	1	1	1	0
322	2	1	1	1	1	0	0	1	0	1	1	1	1	1	1	0	0	0	0	0	0	0	0	1	0	0	1	1	0	1	0	1	1	0	0	1	0	0	1	0	1	1	1	1	1	0	0
323	2	1	0	1	1	1	0	1	0	1	0	1	1	1	1	0	0	0	0	0	0	1	0	0	0	0	1	0	1	1	0	0	0	1	1	1	0	1	0	1	1	0	1	1	1	1	0
324	2	1	1	1	1	1	1	0	0	0	0	0	0	0	0	0	0	0	1	0	0	1	1	0	0	1	0	0	1	1	0	0	1	1	1	0	0	1	0	1	0	1	1	1	1	1	0
326	2	1	1	1	1	1	1	0	0	1	0	0	0	0	0	1	1	1	1	0	0	0	0	1	0	0	1	1	0	1	0	1	1	0	0	1	0	1	0	1	1	1	1	1	1	1	0
327	2	1	1	1	1	0	0	0	1	1	1	1	1	1	1	0	0	0	0	0	0	0	0	0	0	0	1	0	0	0	0	1	1	0	0	1	0	0	1	0	1	1	1	1	1	1	0
328	2	0	0	0	0	0	0	0	1	1	1	1	1	1	1	0	0	0	0	0	0	0	0	1	0	0	1	1	0	1	0	1	0	1	0	1	0	0	1	0	1	0	0	1	1	1	0
329	2	1	1	1	1	1	1	0	0	0	0	0	0	0	0	1	1	1	1	0	0	0	0	1	0	0	1	1	0	1	0	1	1	0	0	1	0	0	1	1	1	1	1	1	1	1	0
330	2	1	1	1	1	0	0	0	1	1	1	0	0	0	0	0	0	0	0	1	1	0	0	1	0	0	1	0	0	1	1	1	0	1	0	1	0	1	0	1	0	0	1	1	1	1	0
331	2	1	1	1	1	1	1	0	0	1	0	1	1	1	1	0	0	0	0	0	0	1	0	0	0	0	0	0	1	1	0	1	0	1	0	1	0	0	1	1	1	0	1	1	1	1	0
332	2	0	0	1	0	0	1	0	0	1	1	-9	-9	-9	-9	-9	-9	-9	-9	-9	-9	0	0	0	0	0	1	0	0	1	0	1	0	0	1	1	0	0	0	1	1	1	0	0	0	1	1
333	2	1	1	1	1	1	0	0	1	1	1	1	1	1	1	0	0	0	0	0	0	0	1	1	1	0	0	0	1	1	1	1	0	1	0	1	0	0	0	1	1	1	1	1	1	1	0
334	2	1	1	1	1	1	1	0	0	1	0	1	1	1	1	0	0	0	0	0	0	0	0	1	0	0	1	1	1	0	1	1	0	0	0	1	1	0	0	0	1	1	1	1	1	1	0
335	2	1	0	1	0	1	0	0	1	1	1	0	0	0	0	1	0	0	0	0	0	0	0	1	0	0	1	1	1	1	1	1	0	1	0	1	0	1	0	1	1	1	1	1	1	1	1
336	2	1	1	1	1	0	0	0	1	1	1	0	0	0	1	0	0	0	0	0	0	0	0	1	0	0	1	1	1	1	0	1	1	0	0	1	0	0	0	1	0	0	1	1	1	1	0
3	3	1	0	1	1	1	1	0	0	0	0	1	1	1	1	0	0	0	0	0	0	0	0	1	0	0	0	1	1	1	1	0	0	0	0	0	0	0	0	1	0	1	0	1	0	0	0
4	3	1	0	1	1	0	0	0	0	1	0	0	0	0	0	0	1	0	0	0	0	0	0	0	1	0	1	0	1	1	1	0	0	1	0	1	0	0	0	0	0	1	1	1	1	1	1
9	3	1	0	1	1	1	1	0	0	0	0	1	0	0	0	0	0	0	0	0	0	1	1	0	0	0	0	0	1	1	1	0	0	1	0	1	0	1	0	1	0	1	1	0	1	1	0
10	3	1	1	1	1	0	0	0	1	1	1	0	0	0	0	1	1	1	1	0	0	0	1	0	1	0	1	1	0	0	1	1	0	0	1	0	1	0	1	1	1	1	1	1	0	1	1
12	3	1	1	1	1	0	0	0	1	1	1	1	1	1	1	0	0	0	0	0	0	0	1	0	1	0	1	1	0	0	0	1	1	0	1	1	0	0	0	1	0	0	1	1	1	1	0
13	3	1	1	1	1	0	0	0	1	1	1	0	0	1	1	0	0	0	0	0	0	-9	-9	-9	-9	-9	-9	-9	1	1	1	0	0	1	0	1	0	0	1	1	1	0	1	1	1	0	0
14	3	1	1	1	1	0	0	0	1	1	1	1	1	1	1	0	0	0	0	0	0	0	1	0	0	0	0	0	0	0	0	0	0	0	1	0	1	0	1	1	1	1	1	1	1	1	0
15	3	1	1	1	1	0	0	0	1	1	1	0	0	0	0	1	1	1	1	0	0	0	0	0	0	0	0	1	0	0	0	1	0	0	1	0	1	0	1	1	1	1	1	1	1	1	0
16	3	1	1	1	1	0	0	1	0	1	1	1	1	1	1	0	0	0	0	0	0	1	0	1	0	0	0	0	0	0	1	1	1	0	0	1	1	0	0	1	1	1	1	0	1	1	0
17	3	1	1	1	1	0	0	0	1	1	1	0	0	0	0	0	0	0	0	0	0	0	0	0	0	1	0	0	0	0	1	1	0	0	1	0	1	0	1	1	1	1	1	1	1	1	0
18	3	1	1	1	1	0	0	0	1	1	1	1	1	0	0	0	0	0	0	0	0	1	1	0	1	0	1	1	0	1	0	0	0	0	1	1	1	1	0	1	1	1	1	1	1	1	0
20	3	-9	0	0	0	0	0	0	1	1	1	0	1	1	0	0	0	1	1	0	0	1	1	0	0	0	0	0	0	0	0	1	0	0	1	0	1	0	0	0	0	1	0	0	0	1	0
21	3	1	1	1	1	0	0	0	1	1	1	1	1	1	1	0	0	0	0	0	0	1	1	0	1	0	0	0	0	1	1	1	0	1	0	1	0	0	1	1	1	1	1	1	1	1	1
22	3	1	1	1	1	0	0	0	0	1	1	1	1	1	1	0	0	0	0	0	0	0	1	1	1	1	0	0	1	1	1	0	0	0	1	0	1	1	0	1	0	1	1	1	1	1	1
23	3	1	1	1	1	1	1	0	0	0	0	1	1	1	1	0	0	0	0	0	0	0	0	1	0	0	1	1	0	0	1	1	0	1	1	1	0	0	0	0	1	1	1	0	1	1	0
24	3	1	1	1	1	0	0	0	0	1	1	1	1	0	0	0	0	0	0	0	0	0	1	1	1	1	0	0	1	1	1	0	0	1	0	1	0	0	1	1	0	1	1	1	1	1	1
25	3	1	1	1	1	1	0	0	1	1	1	0	0	0	0	0	0	0	0	0	0	0	0	1	0	0	1	1	1	1	1	0	0	1	0	1	0	0	1	1	1	0	1	1	1	0	1
26	3	1	1	1	1	1	0	0	1	1	1	1	1	1	1	0	0	0	0	0	0	1	0	1	0	0	1	0	1	1	0	1	0	1	1	1	0	1	0	1	0	1	0	0	0	1	1
27	3	1	1	1	1	0	0	0	0	1	1	1	1	1	1	0	0	0	0	0	0	1	0	0	0	0	0	0	0	0	1	1	1	0	0	1	0	0	0	1	0	1	1	1	1	1	0
28	3	1	1	1	1	0	0	0	0	1	1	1	1	1	1	0	0	0	0	0	0	0	0	1	0	0	1	1	1	1	1	1	1	0	0	1	0	0	0	1	0	1	1	1	1	1	0
29	3	0	0	0	0	0	1	0	0	0	0	0	0	0	1	0	0	0	0	0	0	0	0	0	1	0	0	0	0	0	1	0	1	0	0	1	0	0	0	1	1	0	0	0	0	1	0
30	3	1	1	1	1	0	1	0	0	1	1	1	1	1	1	0	0	0	0	0	0	1	1	1	0	0	1	0	1	0	1	0	0	0	0	1	1	0	0	1	1	1	1	1	1	1	0
31	3	0	0	0	0	0	0	0	1	1	1	1	1	1	1	0	0	0	0	0	0	1	0	0	0	0	0	0	0	0	1	1	0	0	1	1	1	0	0	0	1	0	1	0	1	0	0
32	3	1	1	1	1	0	0	0	1	1	1	1	1	1	1	0	0	0	0	0	0	1	1	1	0	0	0	0	1	1	1	1	0	0	1	1	1	0	1	0	1	1	1	1	1	1	1
34	3	1	1	1	1	1	1	0	0	1	0	0	0	0	0	1	1	1	1	0	0	1	1	1	1	0	0	0	1	1	0	1	0	0	1	1	1	-9	-9	-9	-9	1	1	1	1	1	1
35	3	1	1	1	1	0	0	0	1	1	1	0	0	0	0	1	1	1	1	0	0	1	1	0	1	0	0	0	1	1	1	0	0	0	1	0	1	0	1	0	1	1	1	1	1	1	0
36	3	1	1	1	1	1	1	0	0	1	1	0	0	0	1	0	0	0	0	0	0	0	0	0	0	1	0	0	0	0	1	1	1	0	1	1	0	0	0	0	0	1	0	0	1	0	0
37	3	1	1	1	1	1	1	0	0	0	0	0	0	0	0	0	0	1	0	0	0	1	1	1	1	1	0	0	0	0	1	1	0	1	0	1	0	-9	-9	-9	-9	1	1	1	1	1	1
38	3	1	1	1	1	1	0	0	1	1	1	1	1	1	1	0	0	0	0	0	0	0	0	1	1	0	0	1	1	1	1	1	0	1	0	1	0	0	1	0	1	1	1	1	1	1	1
39	3	-9	1	1	1	0	0	0	0	1	1	0	0	1	0	0	0	0	0	0	0	0	0	0	0	1	0	0	0	1	0	0	0	1	0	1	0	1	0	1	0	0	1	0	1	1	0
40	3	1	1	1	1	1	0	0	1	1	1	1	1	1	1	0	0	0	0	0	0	0	1	0	1	0	0	0	1	1	1	1	0	1	0	1	0	0	1	1	1	1	1	1	1	1	0
42	3	1	0	1	1	0	0	0	0	1	1	0	0	0	0	0	0	0	0	0	0	1	0	0	0	1	0	0	1	1	1	1	0	1	0	1	0	0	0	1	0	1	1	1	1	1	0
43	3	0	0	1	0	0	0	1	0	0	0	1	1	1	1	0	0	0	0	0	0	1	0	0	0	0	0	0	1	1	1	0	0	1	0	1	0	1	0	1	0	1	1	1	1	1	0
44	3	1	1	1	1	0	0	0	0	1	1	1	1	0	0	0	0	0	0	0	0	0	0	1	0	0	1	1	1	0	1	1	0	0	1	0	1	1	1	1	0	1	1	1	1	1	0
45	3	0	0	0	0	0	0	0	0	1	1	0	0	0	1	0	0	0	0	0	1	1	0	0	0	1	0	0	1	1	1	1	1	0	1	1	1	0	0	1	0	0	1	1	1	0	0
